# Supplementary material for: Viperin controls chikungunya virus–specific pathogenic T cell IFNγ Th1 stimulation in mice
Source: Life Sci Alliance. 2019 Jan 21;2(1):e201900298. doi: 10.26508/lsa.201900298 (PMC6342136; doi:10.26508/lsa.201900298)
Supplement: Supplementary file 3 [file LSA-2019-00298_Supporting_information_S10.xlsx]

## Sheet: G-CSF (12)
File Name: O:\SIgNLab\Immuno Monitoring\Luminex results\301-400\Lisa\2017-11-16 YiHao\YiHao_Procarta_36-plex_20171116_20171116_130300.rbx
Analyte: G-CSF (12)
Acquisition Date: 16-Nov-2017, 12:25 PM
Reader Serial Number: FM3DD10333001
Plate ID:
RP1 PMT (Volts): 520.97
RP1 Target: NA
Analyte	Type	Well	Outlier	Description	FI	FI - Bkgd	Std Dev	%CV	Conc in Range	Obs Conc	Exp Conc	(Obs/Exp) * 100	Dilution	Bead Count
G-CSF (12)	B	H1,H2	0	Reagent Name: Background0	35	35	2.83	8.08					1
G-CSF (12)	S1	G1,G2	1	Reagent Name: Standard1	---	---					0.84		1
G-CSF (12)	S2	F1,F2	2	Reagent Name: Standard2	36.5	1.5	0	0	3.54	3.54	3.37	105	1
G-CSF (12)	S3	E1,E2	0	Reagent Name: Standard3	47	12	0	0	13.1	13.1	13.48	97	1
G-CSF (12)	S4	D1,D2	0	Reagent Name: Standard4	95.5	60.5	6.36	6.66	54.37	54.37	53.91	101	1
G-CSF (12)	S5	C1,C2	0	Reagent Name: Standard5	296.5	261.5	37.48	12.64	215.21	215.21	215.63	100	1
G-CSF (12)	S6	B1,B2	0	Reagent Name: Standard6	1023.8	988.8	80.26	7.84	862.67	862.67	862.5	100	1
G-CSF (12)	S7	A1,A2	0	Reagent Name: Standard7	1693	1658	2.83	0.17	3449.01	3449.01	3450	100	1
G-CSF (12)	X1	A3	0	WT1_1dpi	48	13	0	0	13.99	13.99			1
G-CSF (12)	X2	B3	0	WT2_1dpi	47	12	0	0	13.1	13.1			1
G-CSF (12)	X3	C3	0	WT3_1dpi	44	9	0	0	10.42	10.42			1
G-CSF (12)	X4	D3	0	WT4_1dpi	49	14	0	0	14.87	14.87			1
G-CSF (12)	X5	E3	0	WT5_1dpi	45	10	0	0	11.32	11.32			1
G-CSF (12)	X6	F3	0	RH1_6dpi	49.5	14.5	0	0	15.31	15.31			1
G-CSF (12)	X7	G3	0	RHEV1_6dpi	54	19	0	0	19.26	19.26			1
G-CSF (12)	X8	H3	0	EV1_6dpi	44	9	0	0	10.42	10.42			1
G-CSF (12)	X9	A4	0	RH1_1dpi	47	12	0	0	13.1	13.1			1
G-CSF (12)	X10	B4	0	RH2_1dpi	49.5	14.5	0	0	15.31	15.31			1
G-CSF (12)	X11	C4	0	RH3_1dpi	52	17	0	0	17.51	17.51			1
G-CSF (12)	X12	D4	0	RH4_1dpi	48	13	0	0	13.99	13.99			1
G-CSF (12)	X13	E4	0	RH5_1dpi	46	11	0	0	12.21	12.21			1
G-CSF (12)	X14	F4	0	RH2_6dpi	51	16	0	0	16.63	16.63			1
G-CSF (12)	X15	G4	0	RHEV2_6dpi	47	12	0	0	13.1	13.1			1
G-CSF (12)	X16	H4	0	EV2_6dpi	50	15	0	0	15.76	15.76			1
G-CSF (12)	X17	A5	0	RHEV1_1dpi	48	13	0	0	13.99	13.99			1
G-CSF (12)	X18	B5	0	RHEV2_1dpi	48	13	0	0	13.99	13.99			1
G-CSF (12)	X19	C5	0	RHEV3_1dpi	54	19	0	0	19.26	19.26			1
G-CSF (12)	X20	D5	0	RHEV4_1dpi	48	13	0	0	13.99	13.99			1
G-CSF (12)	X21	E5	0	RHEV5_1dpi	47	12	0	0	13.1	13.1			1
G-CSF (12)	X22	F5	0	RH3_6dpi	46.5	11.5	0	0	12.66	12.66			1
G-CSF (12)	X23	G5	0	RHEV3_6dpi	48	13	0	0	13.99	13.99			1
G-CSF (12)	X24	H5	0	EV3_6dpi	45	10	0	0	11.32	11.32			1
G-CSF (12)	X25	A6	0	EV1_1dpi	44	9	0	0	10.42	10.42			1
G-CSF (12)	X26	B6	0	EV2_1dpi	44	9	0	0	10.42	10.42			1
G-CSF (12)	X27	C6	0	EV3_1dpi	45	10	0	0	11.32	11.32			1
G-CSF (12)	X28	D6	0	EV4_1dpi	51	16	0	0	16.63	16.63			1
G-CSF (12)	X29	E6	0	EV5_1dpi	46	11	0	0	12.21	12.21			1
G-CSF (12)	X30	F6	0	RH4_6dpi	52	17	0	0	17.51	17.51			1
G-CSF (12)	X31	G6	0	RHEV4_6dpi	46	11	0	0	12.21	12.21			1
G-CSF (12)	X32	H6	0	EV4_6dpi	43	8	0	0	9.52	9.52			1
G-CSF (12)	X33	A7	0	MK1	42	7	0	0	8.62	8.62			1
G-CSF (12)	X34	B7	0	MK2	44	9	0	0	10.42	10.42			1
G-CSF (12)	X35	C7	0	MK3	45	10	0	0	11.32	11.32			1
G-CSF (12)	X36	D7	0	MK4	40	5	0	0	6.8	6.8			1
G-CSF (12)	X37	E7	0	MK5	45	10	0	0	11.32	11.32			1
G-CSF (12)	X38	F7	0	RH5_6dpi	49	14	0	0	14.87	14.87			1
G-CSF (12)	X39	G7	0	RHEV5_6dpi	48	13	0	0	13.99	13.99			1
G-CSF (12)	X40	H7	0	EV5_6dpi	43	8	0	0	9.52	9.52			1
G-CSF (12)	X41	A8	0	WT1_2dpi	52	17	0	0	17.51	17.51			1
G-CSF (12)	X42	B8	0	WT2_2dpi	49	14	0	0	14.87	14.87			1
G-CSF (12)	X43	C8	0	WT3_2dpi	52	17	0	0	17.51	17.51			1
G-CSF (12)	X44	D8	0	WT4_2dpi	54	19	0	0	19.26	19.26			1
G-CSF (12)	X45	E8	0	WT5_2dpi	49.5	14.5	0	0	15.31	15.31			1
G-CSF (12)	X46	F8	0	G1_WT1	58	23	0	0	22.73	22.73			1
G-CSF (12)	X47	G8	0	G1_WT2	45	10	0	0	11.32	11.32			1
G-CSF (12)	X48	H8	0	G1_WT3	45.5	10.5	0	0	11.77	11.77			1
G-CSF (12)	X49	A9	0	RH1_2dpi	48	13	0	0	13.99	13.99			1
G-CSF (12)	X50	B9	0	RH2_2dpi	56	21	0	0	21	21			1
G-CSF (12)	X51	C9	0	RH3_2dpi	48	13	0	0	13.99	13.99			1
G-CSF (12)	X52	D9	0	RH4_2dpi	51	16	0	0	16.63	16.63			1
G-CSF (12)	X53	E9	0	RH5_2dpi	36	1	0	0	OOR <	*3.06			1
G-CSF (12)	X54	F9	0	G1_Vip1	46	11	0	0	12.21	12.21			1
G-CSF (12)	X55	G9	0	G1_Vip2	43	8	0	0	9.52	9.52			1
G-CSF (12)	X56	H9	0	G1_Vip3	52.5	17.5	0	0	17.95	17.95			1
G-CSF (12)	X57	A10	0	RHEV1_2dpi	43.5	8.5	0	0	9.97	9.97			1
G-CSF (12)	X58	B10	0	RHEV2_2dpi	45	10	0	0	11.32	11.32			1
G-CSF (12)	X59	C10	0	RHEV3_2dpi	46	11	0	0	12.21	12.21			1
G-CSF (12)	X60	D10	0	RHEV4_2dpi	51	16	0	0	16.63	16.63			1
G-CSF (12)	X61	E10	0	RHEV5_2dpi	43.5	8.5	0	0	9.97	9.97			1
G-CSF (12)	X62	F10	0	G2_WT1	50.5	15.5	0	0	16.2	16.2			1
G-CSF (12)	X63	G10	0	G2_WT2	43	8	0	0	9.52	9.52			1
G-CSF (12)	X64	H10	0	G2_WT3	43	8	0	0	9.52	9.52			1
G-CSF (12)	X65	A11	0	EV1_2dpi	48	13	0	0	13.99	13.99			1
G-CSF (12)	X66	B11	0	EV2_2dpi	58	23	0	0	22.73	22.73			1
G-CSF (12)	X67	C11	0	EV3_2dpi	51	16	0	0	16.63	16.63			1
G-CSF (12)	X68	D11	0	EV4_2dpi	48	13	0	0	13.99	13.99			1
G-CSF (12)	X69	E11	0	EV5_2dpi	56	21	0	0	21	21			1
G-CSF (12)	X70	F11	0	G2_WT4	45	10	0	0	11.32	11.32			1
G-CSF (12)	X71	G11	0	G2_Vip1	51	16	0	0	16.63	16.63			1
G-CSF (12)	X72	H11	0	G2_Vip2	45	10	0	0	11.32	11.32			1
G-CSF (12)	X73	A12	0	WT1_6dpi	39	4	0	0	5.88	5.88			1
G-CSF (12)	X74	B12	0	WT2_6dpi	43	8	0	0	9.52	9.52			1
G-CSF (12)	X75	C12	0	WT3_6dpi	36	1	0	0	OOR <	*3.06			1
G-CSF (12)	X76	D12	0	WT4_6dpi	39	4	0	0	5.88	5.88			1
G-CSF (12)	X77	E12	0	WT5_6dpi	38	3	0	0	4.95	4.95			1
G-CSF (12)	X78	F12	0	G2_Vip3	35	0	0	0	OOR <	*2.10			1
G-CSF (12)	X79	G12	0	G2_Vip4	45	10	0	0	11.32	11.32			1
G-CSF (12)	X80	H12	0	G2_Vip5	51	16	0	0	16.63	16.63			1
Analyte	Type	Well	Outlier	Description	FI	FI - Bkgd	Std Dev	%CV	Conc in Range	Obs Conc	Exp Conc	(Obs/Exp) * 100	Dilution	Bead Count
G-CSF (12)	B	H1	0	Reagent Name: Background0	37	37							1	76
G-CSF (12)	B	H2	0	Reagent Name: Background0	33	33							1	60
G-CSF (12)	S1	G1	1	Reagent Name: Standard1	36.5	1.5					0.84		1	80
G-CSF (12)	S1	G2	1	Reagent Name: Standard1	33	-2					0.84		1	62
G-CSF (12)	S2	F1	0	Reagent Name: Standard2	36.5	1.5			3.54	3.54	3.37	105	1	76
G-CSF (12)	S2	F2	1	Reagent Name: Standard2	41	6					3.37		1	75
G-CSF (12)	S3	E1	0	Reagent Name: Standard3	47	12			13.1	13.1	13.48	97	1	81
G-CSF (12)	S3	E2	0	Reagent Name: Standard3	47	12			13.1	13.1	13.48	97	1	83
G-CSF (12)	S4	D1	0	Reagent Name: Standard4	100	65			58.1	58.1	53.91	108	1	99
G-CSF (12)	S4	D2	0	Reagent Name: Standard4	91	56			50.64	50.64	53.91	94	1	67
G-CSF (12)	S5	C1	0	Reagent Name: Standard5	323	288			236.09	236.09	215.63	109	1	63
G-CSF (12)	S5	C2	0	Reagent Name: Standard5	270	235			194.32	194.32	215.63	90	1	57
G-CSF (12)	S6	B1	0	Reagent Name: Standard6	1080.5	1045.5			930.04	930.04	862.5	108	1	68
G-CSF (12)	S6	B2	0	Reagent Name: Standard6	967	932			799.79	799.79	862.5	93	1	92
G-CSF (12)	S7	A1	0	Reagent Name: Standard7	1691	1656			3401.2	3401.2	3450	99	1	91
G-CSF (12)	S7	A2	0	Reagent Name: Standard7	1695	1660			OOR >	*3499.03	3450	101	1	58
G-CSF (12)	X1	A3	0	WT1_1dpi	48	13			13.99	13.99			1	102
G-CSF (12)	X2	B3	0	WT2_1dpi	47	12			13.1	13.1			1	193
G-CSF (12)	X3	C3	0	WT3_1dpi	44	9			10.42	10.42			1	164
G-CSF (12)	X4	D3	0	WT4_1dpi	49	14			14.87	14.87			1	98
G-CSF (12)	X5	E3	0	WT5_1dpi	45	10			11.32	11.32			1	144
G-CSF (12)	X6	F3	0	RH1_6dpi	49.5	14.5			15.31	15.31			1	114
G-CSF (12)	X7	G3	0	RHEV1_6dpi	54	19			19.26	19.26			1	80
G-CSF (12)	X8	H3	0	EV1_6dpi	44	9			10.42	10.42			1	223
G-CSF (12)	X9	A4	0	RH1_1dpi	47	12			13.1	13.1			1	142
G-CSF (12)	X10	B4	0	RH2_1dpi	49.5	14.5			15.31	15.31			1	150
G-CSF (12)	X11	C4	0	RH3_1dpi	52	17			17.51	17.51			1	149
G-CSF (12)	X12	D4	0	RH4_1dpi	48	13			13.99	13.99			1	124
G-CSF (12)	X13	E4	0	RH5_1dpi	46	11			12.21	12.21			1	191
G-CSF (12)	X14	F4	0	RH2_6dpi	51	16			16.63	16.63			1	143
G-CSF (12)	X15	G4	0	RHEV2_6dpi	47	12			13.1	13.1			1	115
G-CSF (12)	X16	H4	0	EV2_6dpi	50	15			15.76	15.76			1	104
G-CSF (12)	X17	A5	0	RHEV1_1dpi	48	13			13.99	13.99			1	65
G-CSF (12)	X18	B5	0	RHEV2_1dpi	48	13			13.99	13.99			1	114
G-CSF (12)	X19	C5	0	RHEV3_1dpi	54	19			19.26	19.26			1	121
G-CSF (12)	X20	D5	0	RHEV4_1dpi	48	13			13.99	13.99			1	173
G-CSF (12)	X21	E5	0	RHEV5_1dpi	47	12			13.1	13.1			1	219
G-CSF (12)	X22	F5	0	RH3_6dpi	46.5	11.5			12.66	12.66			1	102
G-CSF (12)	X23	G5	0	RHEV3_6dpi	48	13			13.99	13.99			1	121
G-CSF (12)	X24	H5	0	EV3_6dpi	45	10			11.32	11.32			1	139
G-CSF (12)	X25	A6	0	EV1_1dpi	44	9			10.42	10.42			1	140
G-CSF (12)	X26	B6	0	EV2_1dpi	44	9			10.42	10.42			1	119
G-CSF (12)	X27	C6	0	EV3_1dpi	45	10			11.32	11.32			1	167
G-CSF (12)	X28	D6	0	EV4_1dpi	51	16			16.63	16.63			1	117
G-CSF (12)	X29	E6	0	EV5_1dpi	46	11			12.21	12.21			1	211
G-CSF (12)	X30	F6	0	RH4_6dpi	52	17			17.51	17.51			1	120
G-CSF (12)	X31	G6	0	RHEV4_6dpi	46	11			12.21	12.21			1	173
G-CSF (12)	X32	H6	0	EV4_6dpi	43	8			9.52	9.52			1	72
G-CSF (12)	X33	A7	0	MK1	42	7			8.62	8.62			1	118
G-CSF (12)	X34	B7	0	MK2	44	9			10.42	10.42			1	117
G-CSF (12)	X35	C7	0	MK3	45	10			11.32	11.32			1	172
G-CSF (12)	X36	D7	0	MK4	40	5			6.8	6.8			1	128
G-CSF (12)	X37	E7	0	MK5	45	10			11.32	11.32			1	179
G-CSF (12)	X38	F7	0	RH5_6dpi	49	14			14.87	14.87			1	121
G-CSF (12)	X39	G7	0	RHEV5_6dpi	48	13			13.99	13.99			1	101
G-CSF (12)	X40	H7	0	EV5_6dpi	43	8			9.52	9.52			1	95
G-CSF (12)	X41	A8	0	WT1_2dpi	52	17			17.51	17.51			1	153
G-CSF (12)	X42	B8	0	WT2_2dpi	49	14			14.87	14.87			1	121
G-CSF (12)	X43	C8	0	WT3_2dpi	52	17			17.51	17.51			1	194
G-CSF (12)	X44	D8	0	WT4_2dpi	54	19			19.26	19.26			1	227
G-CSF (12)	X45	E8	0	WT5_2dpi	49.5	14.5			15.31	15.31			1	150
G-CSF (12)	X46	F8	0	G1_WT1	58	23			22.73	22.73			1	139
G-CSF (12)	X47	G8	0	G1_WT2	45	10			11.32	11.32			1	105
G-CSF (12)	X48	H8	0	G1_WT3	45.5	10.5			11.77	11.77			1	118
G-CSF (12)	X49	A9	0	RH1_2dpi	48	13			13.99	13.99			1	152
G-CSF (12)	X50	B9	0	RH2_2dpi	56	21			21	21			1	312
G-CSF (12)	X51	C9	0	RH3_2dpi	48	13			13.99	13.99			1	111
G-CSF (12)	X52	D9	0	RH4_2dpi	51	16			16.63	16.63			1	116
G-CSF (12)	X53	E9	0	RH5_2dpi	36	1			OOR <	*3.06			1	197
G-CSF (12)	X54	F9	0	G1_Vip1	46	11			12.21	12.21			1	83
G-CSF (12)	X55	G9	0	G1_Vip2	43	8			9.52	9.52			1	84
G-CSF (12)	X56	H9	0	G1_Vip3	52.5	17.5			17.95	17.95			1	88
G-CSF (12)	X57	A10	0	RHEV1_2dpi	43.5	8.5			9.97	9.97			1	148
G-CSF (12)	X58	B10	0	RHEV2_2dpi	45	10			11.32	11.32			1	177
G-CSF (12)	X59	C10	0	RHEV3_2dpi	46	11			12.21	12.21			1	187
G-CSF (12)	X60	D10	0	RHEV4_2dpi	51	16			16.63	16.63			1	74
G-CSF (12)	X61	E10	0	RHEV5_2dpi	43.5	8.5			9.97	9.97			1	172
G-CSF (12)	X62	F10	0	G2_WT1	50.5	15.5			16.2	16.2			1	174
G-CSF (12)	X63	G10	0	G2_WT2	43	8			9.52	9.52			1	125
G-CSF (12)	X64	H10	0	G2_WT3	43	8			9.52	9.52			1	129
G-CSF (12)	X65	A11	0	EV1_2dpi	48	13			13.99	13.99			1	104
G-CSF (12)	X66	B11	0	EV2_2dpi	58	23			22.73	22.73			1	143
G-CSF (12)	X67	C11	0	EV3_2dpi	51	16			16.63	16.63			1	107
G-CSF (12)	X68	D11	0	EV4_2dpi	48	13			13.99	13.99			1	120
G-CSF (12)	X69	E11	0	EV5_2dpi	56	21			21	21			1	87
G-CSF (12)	X70	F11	0	G2_WT4	45	10			11.32	11.32			1	179
G-CSF (12)	X71	G11	0	G2_Vip1	51	16			16.63	16.63			1	100
G-CSF (12)	X72	H11	0	G2_Vip2	45	10			11.32	11.32			1	107
G-CSF (12)	X73	A12	0	WT1_6dpi	39	4			5.88	5.88			1	84
G-CSF (12)	X74	B12	0	WT2_6dpi	43	8			9.52	9.52			1	103
G-CSF (12)	X75	C12	0	WT3_6dpi	36	1			OOR <	*3.06			1	96
G-CSF (12)	X76	D12	0	WT4_6dpi	39	4			5.88	5.88			1	109
G-CSF (12)	X77	E12	0	WT5_6dpi	38	3			4.95	4.95			1	53
G-CSF (12)	X78	F12	0	G2_Vip3	35	0			OOR <	*2.10			1	101
G-CSF (12)	X79	G12	0	G2_Vip4	45	10			11.32	11.32			1	195
G-CSF (12)	X80	H12	0	G2_Vip5	51	16			16.63	16.63			1	152
*** = Value not available; --- = Designated as an outlier
*Value = Value extrapolated beyond standard range
OOR = Out of Range; OOR> = Out of Range Above; OOR< = Out of Range Below
Exp Conc = Expected Concentration; Obs Conc = Observed Concentration
Conc in Range = Unknown sample concentrations within range where standards recovery is 80-120%
Conc In Range = 3.539 to 3449.014 (equivalent to 1.5 to 1658.0 FI - Bkgd)
Regression Type: Logistic - 5PL
Std. Curve: FI = -2.06177 + (1719.12 + 2.06177) / ((1 + (Conc / 1280.7)^-2.45143))^0.427953
FitProb. = 0.8391, ResVar. = 0.0412

## Sheet: IL-10 (13)
File Name: O:\SIgNLab\Immuno Monitoring\Luminex results\301-400\Lisa\2017-11-16 YiHao\YiHao_Procarta_36-plex_20171116_20171116_130300.rbx
Analyte: IL-10 (13)
Acquisition Date: 16-Nov-2017, 12:25 PM
Reader Serial Number: FM3DD10333001
Plate ID:
RP1 PMT (Volts): 520.97
RP1 Target: NA
Analyte	Type	Well	Outlier	Description	FI	FI - Bkgd	Std Dev	%CV	Conc in Range	Obs Conc	Exp Conc	(Obs/Exp) * 100	Dilution	Bead Count
IL-10 (13)	B	H1,H2	0	Reagent Name: Background0	48	48	1.41	2.95					1
IL-10 (13)	S1	G1,G2	1	Reagent Name: Standard1	---	---					2.27		1
IL-10 (13)	S2	F1,F2	1	Reagent Name: Standard2	---	---					9.08		1
IL-10 (13)	S3	E1,E2	2	Reagent Name: Standard3	48	0	0	0	33.42	33.42	36.33	92	1
IL-10 (13)	S4	D1,D2	2	Reagent Name: Standard4	74	26	0	0	153.16	153.16	145.31	105	1
IL-10 (13)	S5	C1,C2	0	Reagent Name: Standard5	179.8	131.8	37.12	20.65	569.01	569.01	581.25	98	1
IL-10 (13)	S6	B1,B2	0	Reagent Name: Standard6	691.5	643.5	123.74	17.89	2341.52	2341.52	2325	101	1
IL-10 (13)	S7	A1,A2	0	Reagent Name: Standard7	2670.3	2622.3	200.46	7.51	9291.26	9291.26	9300	100	1
IL-10 (13)	X1	A3	0	WT1_1dpi	51	3	0	0	48.55	48.55			1
IL-10 (13)	X2	B3	0	WT2_1dpi	54.5	6.5	0	0	65.51	65.51			1
IL-10 (13)	X3	C3	0	WT3_1dpi	49	1	0	0	38.54	38.54			1
IL-10 (13)	X4	D3	0	WT4_1dpi	70	22	0	0	135.81	135.81			1
IL-10 (13)	X5	E3	0	WT5_1dpi	51	3	0	0	48.55	48.55			1
IL-10 (13)	X6	F3	0	RH1_6dpi	73	25	0	0	148.84	148.84			1
IL-10 (13)	X7	G3	0	RHEV1_6dpi	68.5	20.5	0	0	129.24	129.24			1
IL-10 (13)	X8	H3	0	EV1_6dpi	70	22	0	0	135.81	135.81			1
IL-10 (13)	X9	A4	0	RH1_1dpi	48	0	0	0	33.42	33.42			1
IL-10 (13)	X10	B4	0	RH2_1dpi	51	3	0	0	48.55	48.55			1
IL-10 (13)	X11	C4	0	RH3_1dpi	65	17	0	0	113.75	113.75			1
IL-10 (13)	X12	D4	0	RH4_1dpi	61	13	0	0	95.73	95.73			1
IL-10 (13)	X13	E4	0	RH5_1dpi	53	5	0	0	58.31	58.31			1
IL-10 (13)	X14	F4	0	RH2_6dpi	70.5	22.5	0	0	137.99	137.99			1
IL-10 (13)	X15	G4	0	RHEV2_6dpi	76	28	0	0	161.74	161.74			1
IL-10 (13)	X16	H4	0	EV2_6dpi	56	8	0	0	72.61	72.61			1
IL-10 (13)	X17	A5	0	RHEV1_1dpi	51.5	3.5	0	0	51.01	51.01			1
IL-10 (13)	X18	B5	0	RHEV2_1dpi	78.5	30.5	0	0	172.4	172.4			1
IL-10 (13)	X19	C5	0	RHEV3_1dpi	65	17	0	0	113.75	113.75			1
IL-10 (13)	X20	D5	0	RHEV4_1dpi	56.5	8.5	0	0	74.96	74.96			1
IL-10 (13)	X21	E5	0	RHEV5_1dpi	80	32	0	0	178.76	178.76			1
IL-10 (13)	X22	F5	0	RH3_6dpi	76.5	28.5	0	0	163.88	163.88			1
IL-10 (13)	X23	G5	0	RHEV3_6dpi	73	25	0	0	148.84	148.84			1
IL-10 (13)	X24	H5	0	EV3_6dpi	51.5	3.5	0	0	51.01	51.01			1
IL-10 (13)	X25	A6	0	EV1_1dpi	48	0	0	0	33.42	33.42			1
IL-10 (13)	X26	B6	0	EV2_1dpi	50	2	0	0	43.58	43.58			1
IL-10 (13)	X27	C6	0	EV3_1dpi	63	15	0	0	104.79	104.79			1
IL-10 (13)	X28	D6	0	EV4_1dpi	69	21	0	0	131.44	131.44			1
IL-10 (13)	X29	E6	0	EV5_1dpi	54	6	0	0	63.12	63.12			1
IL-10 (13)	X30	F6	0	RH4_6dpi	80	32	0	0	178.76	178.76			1
IL-10 (13)	X31	G6	0	RHEV4_6dpi	84	36	0	0	195.59	195.59			1
IL-10 (13)	X32	H6	0	EV4_6dpi	83	35	0	0	191.4	191.4			1
IL-10 (13)	X33	A7	0	MK1	45.5	-2.5	0	0	OOR <	*20.13			1
IL-10 (13)	X34	B7	0	MK2	44	-4	0	0	OOR <	*11.64			1
IL-10 (13)	X35	C7	0	MK3	48	0	0	0	33.42	33.42			1
IL-10 (13)	X36	D7	0	MK4	41	-7	0	0	OOR <	OOR <			1
IL-10 (13)	X37	E7	0	MK5	42.5	-5.5	0	0	OOR <	*2.16			1
IL-10 (13)	X38	F7	0	RH5_6dpi	72	24	0	0	144.52	144.52			1
IL-10 (13)	X39	G7	0	RHEV5_6dpi	67	19	0	0	122.63	122.63			1
IL-10 (13)	X40	H7	0	EV5_6dpi	61	13	0	0	95.73	95.73			1
IL-10 (13)	X41	A8	0	WT1_2dpi	49	1	0	0	38.54	38.54			1
IL-10 (13)	X42	B8	0	WT2_2dpi	57.5	9.5	0	0	79.63	79.63			1
IL-10 (13)	X43	C8	0	WT3_2dpi	64.5	16.5	0	0	111.52	111.52			1
IL-10 (13)	X44	D8	0	WT4_2dpi	60	12	0	0	91.17	91.17			1
IL-10 (13)	X45	E8	0	WT5_2dpi	64	16	0	0	109.28	109.28			1
IL-10 (13)	X46	F8	0	G1_WT1	102	54	0	0	269.48	269.48			1
IL-10 (13)	X47	G8	0	G1_WT2	80	32	0	0	178.76	178.76			1
IL-10 (13)	X48	H8	0	G1_WT3	100	52	0	0	261.4	261.4			1
IL-10 (13)	X49	A9	0	RH1_2dpi	51.5	3.5	0	0	51.01	51.01			1
IL-10 (13)	X50	B9	0	RH2_2dpi	68	20	0	0	127.04	127.04			1
IL-10 (13)	X51	C9	0	RH3_2dpi	55	7	0	0	67.89	67.89			1
IL-10 (13)	X52	D9	0	RH4_2dpi	55	7	0	0	67.89	67.89			1
IL-10 (13)	X53	E9	0	RH5_2dpi	86.5	38.5	0	0	206.02	206.02			1
IL-10 (13)	X54	F9	0	G1_Vip1	57.5	9.5	0	0	79.63	79.63			1
IL-10 (13)	X55	G9	0	G1_Vip2	86	38	0	0	203.94	203.94			1
IL-10 (13)	X56	H9	0	G1_Vip3	66.5	18.5	0	0	120.42	120.42			1
IL-10 (13)	X57	A10	0	RHEV1_2dpi	49.5	1.5	0	0	41.07	41.07			1
IL-10 (13)	X58	B10	0	RHEV2_2dpi	48.5	0.5	0	0	35.99	35.99			1
IL-10 (13)	X59	C10	0	RHEV3_2dpi	63	15	0	0	104.79	104.79			1
IL-10 (13)	X60	D10	0	RHEV4_2dpi	57.5	9.5	0	0	79.63	79.63			1
IL-10 (13)	X61	E10	0	RHEV5_2dpi	49	1	0	0	38.54	38.54			1
IL-10 (13)	X62	F10	0	G2_WT1	67	19	0	0	122.63	122.63			1
IL-10 (13)	X63	G10	0	G2_WT2	56	8	0	0	72.61	72.61			1
IL-10 (13)	X64	H10	0	G2_WT3	90	42	0	0	220.52	220.52			1
IL-10 (13)	X65	A11	0	EV1_2dpi	56	8	0	0	72.61	72.61			1
IL-10 (13)	X66	B11	0	EV2_2dpi	56	8	0	0	72.61	72.61			1
IL-10 (13)	X67	C11	0	EV3_2dpi	56	8	0	0	72.61	72.61			1
IL-10 (13)	X68	D11	0	EV4_2dpi	58	10	0	0	81.95	81.95			1
IL-10 (13)	X69	E11	0	EV5_2dpi	50.5	2.5	0	0	46.07	46.07			1
IL-10 (13)	X70	F11	0	G2_WT4	83	35	0	0	191.4	191.4			1
IL-10 (13)	X71	G11	0	G2_Vip1	102	54	0	0	269.48	269.48			1
IL-10 (13)	X72	H11	0	G2_Vip2	48	0	0	0	33.42	33.42			1
IL-10 (13)	X73	A12	0	WT1_6dpi	35	-13	0	0	OOR <	OOR <			1
IL-10 (13)	X74	B12	0	WT2_6dpi	51	3	0	0	48.55	48.55			1
IL-10 (13)	X75	C12	0	WT3_6dpi	41	-7	0	0	OOR <	OOR <			1
IL-10 (13)	X76	D12	0	WT4_6dpi	45.5	-2.5	0	0	OOR <	*20.13			1
IL-10 (13)	X77	E12	0	WT5_6dpi	38	-10	0	0	OOR <	OOR <			1
IL-10 (13)	X78	F12	0	G2_Vip3	43	-5	0	0	OOR <	*5.53			1
IL-10 (13)	X79	G12	0	G2_Vip4	60	12	0	0	91.17	91.17			1
IL-10 (13)	X80	H12	0	G2_Vip5	82	34	0	0	187.19	187.19			1
Analyte	Type	Well	Outlier	Description	FI	FI - Bkgd	Std Dev	%CV	Conc in Range	Obs Conc	Exp Conc	(Obs/Exp) * 100	Dilution	Bead Count
IL-10 (13)	B	H1	0	Reagent Name: Background0	49	49							1	78
IL-10 (13)	B	H2	0	Reagent Name: Background0	47	47							1	71
IL-10 (13)	S1	G1	1	Reagent Name: Standard1	43	-5					2.27		1	81
IL-10 (13)	S1	G2	1	Reagent Name: Standard1	36	-12					2.27		1	64
IL-10 (13)	S2	F1	1	Reagent Name: Standard2	55.5	7.5					9.08		1	66
IL-10 (13)	S2	F2	1	Reagent Name: Standard2	59.5	11.5					9.08		1	56
IL-10 (13)	S3	E1	1	Reagent Name: Standard3	68	20					36.33		1	57
IL-10 (13)	S3	E2	0	Reagent Name: Standard3	48	0			33.42	33.42	36.33	92	1	66
IL-10 (13)	S4	D1	1	Reagent Name: Standard4	116	68					145.31		1	54
IL-10 (13)	S4	D2	0	Reagent Name: Standard4	74	26			153.16	153.16	145.31	105	1	53
IL-10 (13)	S5	C1	0	Reagent Name: Standard5	153.5	105.5			470.37	470.37	581.25	81	1	56
IL-10 (13)	S5	C2	0	Reagent Name: Standard5	206	158			665.93	665.93	581.25	115	1	51
IL-10 (13)	S6	B1	0	Reagent Name: Standard6	779	731			2635.14	2635.14	2325	113	1	55
IL-10 (13)	S6	B2	0	Reagent Name: Standard6	604	556			2046.97	2046.97	2325	88	1	61
IL-10 (13)	S7	A1	0	Reagent Name: Standard7	2528.5	2480.5			8754.03	8754.03	9300	94	1	62
IL-10 (13)	S7	A2	0	Reagent Name: Standard7	2812	2764			OOR >	*9837.02	9300	106	1	51
IL-10 (13)	X1	A3	0	WT1_1dpi	51	3			48.55	48.55			1	64
IL-10 (13)	X2	B3	0	WT2_1dpi	54.5	6.5			65.51	65.51			1	118
IL-10 (13)	X3	C3	0	WT3_1dpi	49	1			38.54	38.54			1	80
IL-10 (13)	X4	D3	0	WT4_1dpi	70	22			135.81	135.81			1	62
IL-10 (13)	X5	E3	0	WT5_1dpi	51	3			48.55	48.55			1	84
IL-10 (13)	X6	F3	0	RH1_6dpi	73	25			148.84	148.84			1	97
IL-10 (13)	X7	G3	0	RHEV1_6dpi	68.5	20.5			129.24	129.24			1	46
IL-10 (13)	X8	H3	0	EV1_6dpi	70	22			135.81	135.81			1	98
IL-10 (13)	X9	A4	0	RH1_1dpi	48	0			33.42	33.42			1	95
IL-10 (13)	X10	B4	0	RH2_1dpi	51	3			48.55	48.55			1	87
IL-10 (13)	X11	C4	0	RH3_1dpi	65	17			113.75	113.75			1	91
IL-10 (13)	X12	D4	0	RH4_1dpi	61	13			95.73	95.73			1	78
IL-10 (13)	X13	E4	0	RH5_1dpi	53	5			58.31	58.31			1	97
IL-10 (13)	X14	F4	0	RH2_6dpi	70.5	22.5			137.99	137.99			1	102
IL-10 (13)	X15	G4	0	RHEV2_6dpi	76	28			161.74	161.74			1	51
IL-10 (13)	X16	H4	0	EV2_6dpi	56	8			72.61	72.61			1	31
IL-10 (13)	X17	A5	0	RHEV1_1dpi	51.5	3.5			51.01	51.01			1	40
IL-10 (13)	X18	B5	0	RHEV2_1dpi	78.5	30.5			172.4	172.4			1	60
IL-10 (13)	X19	C5	0	RHEV3_1dpi	65	17			113.75	113.75			1	65
IL-10 (13)	X20	D5	0	RHEV4_1dpi	56.5	8.5			74.96	74.96			1	80
IL-10 (13)	X21	E5	0	RHEV5_1dpi	80	32			178.76	178.76			1	73
IL-10 (13)	X22	F5	0	RH3_6dpi	76.5	28.5			163.88	163.88			1	62
IL-10 (13)	X23	G5	0	RHEV3_6dpi	73	25			148.84	148.84			1	66
IL-10 (13)	X24	H5	0	EV3_6dpi	51.5	3.5			51.01	51.01			1	80
IL-10 (13)	X25	A6	0	EV1_1dpi	48	0			33.42	33.42			1	104
IL-10 (13)	X26	B6	0	EV2_1dpi	50	2			43.58	43.58			1	101
IL-10 (13)	X27	C6	0	EV3_1dpi	63	15			104.79	104.79			1	116
IL-10 (13)	X28	D6	0	EV4_1dpi	69	21			131.44	131.44			1	83
IL-10 (13)	X29	E6	0	EV5_1dpi	54	6			63.12	63.12			1	71
IL-10 (13)	X30	F6	0	RH4_6dpi	80	32			178.76	178.76			1	66
IL-10 (13)	X31	G6	0	RHEV4_6dpi	84	36			195.59	195.59			1	121
IL-10 (13)	X32	H6	0	EV4_6dpi	83	35			191.4	191.4			1	35
IL-10 (13)	X33	A7	0	MK1	45.5	-2.5			OOR <	*20.13			1	74
IL-10 (13)	X34	B7	0	MK2	44	-4			OOR <	*11.64			1	76
IL-10 (13)	X35	C7	0	MK3	48	0			33.42	33.42			1	124
IL-10 (13)	X36	D7	0	MK4	41	-7			OOR <	OOR <			1	74
IL-10 (13)	X37	E7	0	MK5	42.5	-5.5			OOR <	*2.16			1	94
IL-10 (13)	X38	F7	0	RH5_6dpi	72	24			144.52	144.52			1	70
IL-10 (13)	X39	G7	0	RHEV5_6dpi	67	19			122.63	122.63			1	59
IL-10 (13)	X40	H7	0	EV5_6dpi	61	13			95.73	95.73			1	79
IL-10 (13)	X41	A8	0	WT1_2dpi	49	1			38.54	38.54			1	103
IL-10 (13)	X42	B8	0	WT2_2dpi	57.5	9.5			79.63	79.63			1	82
IL-10 (13)	X43	C8	0	WT3_2dpi	64.5	16.5			111.52	111.52			1	106
IL-10 (13)	X44	D8	0	WT4_2dpi	60	12			91.17	91.17			1	102
IL-10 (13)	X45	E8	0	WT5_2dpi	64	16			109.28	109.28			1	97
IL-10 (13)	X46	F8	0	G1_WT1	102	54			269.48	269.48			1	50
IL-10 (13)	X47	G8	0	G1_WT2	80	32			178.76	178.76			1	51
IL-10 (13)	X48	H8	0	G1_WT3	100	52			261.4	261.4			1	81
IL-10 (13)	X49	A9	0	RH1_2dpi	51.5	3.5			51.01	51.01			1	86
IL-10 (13)	X50	B9	0	RH2_2dpi	68	20			127.04	127.04			1	94
IL-10 (13)	X51	C9	0	RH3_2dpi	55	7			67.89	67.89			1	76
IL-10 (13)	X52	D9	0	RH4_2dpi	55	7			67.89	67.89			1	93
IL-10 (13)	X53	E9	0	RH5_2dpi	86.5	38.5			206.02	206.02			1	108
IL-10 (13)	X54	F9	0	G1_Vip1	57.5	9.5			79.63	79.63			1	58
IL-10 (13)	X55	G9	0	G1_Vip2	86	38			203.94	203.94			1	61
IL-10 (13)	X56	H9	0	G1_Vip3	66.5	18.5			120.42	120.42			1	50
IL-10 (13)	X57	A10	0	RHEV1_2dpi	49.5	1.5			41.07	41.07			1	82
IL-10 (13)	X58	B10	0	RHEV2_2dpi	48.5	0.5			35.99	35.99			1	80
IL-10 (13)	X59	C10	0	RHEV3_2dpi	63	15			104.79	104.79			1	110
IL-10 (13)	X60	D10	0	RHEV4_2dpi	57.5	9.5			79.63	79.63			1	72
IL-10 (13)	X61	E10	0	RHEV5_2dpi	49	1			38.54	38.54			1	96
IL-10 (13)	X62	F10	0	G2_WT1	67	19			122.63	122.63			1	103
IL-10 (13)	X63	G10	0	G2_WT2	56	8			72.61	72.61			1	65
IL-10 (13)	X64	H10	0	G2_WT3	90	42			220.52	220.52			1	111
IL-10 (13)	X65	A11	0	EV1_2dpi	56	8			72.61	72.61			1	71
IL-10 (13)	X66	B11	0	EV2_2dpi	56	8			72.61	72.61			1	95
IL-10 (13)	X67	C11	0	EV3_2dpi	56	8			72.61	72.61			1	93
IL-10 (13)	X68	D11	0	EV4_2dpi	58	10			81.95	81.95			1	74
IL-10 (13)	X69	E11	0	EV5_2dpi	50.5	2.5			46.07	46.07			1	50
IL-10 (13)	X70	F11	0	G2_WT4	83	35			191.4	191.4			1	79
IL-10 (13)	X71	G11	0	G2_Vip1	102	54			269.48	269.48			1	39
IL-10 (13)	X72	H11	0	G2_Vip2	48	0			33.42	33.42			1	47
IL-10 (13)	X73	A12	0	WT1_6dpi	35	-13			OOR <	OOR <			1	64
IL-10 (13)	X74	B12	0	WT2_6dpi	51	3			48.55	48.55			1	53
IL-10 (13)	X75	C12	0	WT3_6dpi	41	-7			OOR <	OOR <			1	66
IL-10 (13)	X76	D12	0	WT4_6dpi	45.5	-2.5			OOR <	*20.13			1	84
IL-10 (13)	X77	E12	0	WT5_6dpi	38	-10			OOR <	OOR <			1	35
IL-10 (13)	X78	F12	0	G2_Vip3	43	-5			OOR <	*5.53			1	65
IL-10 (13)	X79	G12	0	G2_Vip4	60	12			91.17	91.17			1	65
IL-10 (13)	X80	H12	0	G2_Vip5	82	34			187.19	187.19			1	58
*** = Value not available; --- = Designated as an outlier
*Value = Value extrapolated beyond standard range
OOR = Out of Range; OOR> = Out of Range Above; OOR< = Out of Range Below
Exp Conc = Expected Concentration; Obs Conc = Observed Concentration
Conc in Range = Unknown sample concentrations within range where standards recovery is 80-120%
Conc In Range = 33.417 to 9291.256 (equivalent to 0.0 to 2622.3 FI - Bkgd)
Regression Type: Logistic - 4PL
Std. Curve: FI = -5.76746 + (15016.4 + 5.76746) / (1 + (Conc / 37024.1)^-1.12188)
FitProb. = 0.5608, ResVar. = 0.3383

## Sheet: IL-3 (14)
File Name: O:\SIgNLab\Immuno Monitoring\Luminex results\301-400\Lisa\2017-11-16 YiHao\YiHao_Procarta_36-plex_20171116_20171116_130300.rbx
Analyte: IL-3 (14)
Acquisition Date: 16-Nov-2017, 12:25 PM
Reader Serial Number: FM3DD10333001
Plate ID:
RP1 PMT (Volts): 520.97
RP1 Target: NA
Analyte	Type	Well	Outlier	Description	FI	FI - Bkgd	Std Dev	%CV	Conc in Range	Obs Conc	Exp Conc	(Obs/Exp) * 100	Dilution	Bead Count
IL-3 (14)	B	H1,H2	0	Reagent Name: Background0	21.8	21.8	10.96	50.39					1
IL-3 (14)	S1	G1,G2	1	Reagent Name: Standard1	---	---					0.34		1
IL-3 (14)	S2	F1,F2	2	Reagent Name: Standard2	25	3.3	0	0	1.22	1.22	1.37	89	1
IL-3 (14)	S3	E1,E2	2	Reagent Name: Standard3	50.5	28.8	0	0	6.34	6.34	5.47	116	1
IL-3 (14)	S4	D1,D2	0	Reagent Name: Standard4	114.5	92.8	7.78	6.79	20.25	20.25	21.88	93	1
IL-3 (14)	S5	C1,C2	0	Reagent Name: Standard5	408	386.3	56.57	13.86	89.51	89.51	87.5	102	1
IL-3 (14)	S6	B1,B2	0	Reagent Name: Standard6	1423	1401.3	35.36	2.48	350.14	350.14	350	100	1
IL-3 (14)	S7	A1,A2	0	Reagent Name: Standard7	3853.5	3831.8	38.89	1.01	1399.99	1399.99	1400	100	1
IL-3 (14)	X1	A3	0	WT1_1dpi	26	4.3	0	0	1.41	1.41			1
IL-3 (14)	X2	B3	0	WT2_1dpi	27.5	5.8	0	0	1.7	1.7			1
IL-3 (14)	X3	C3	0	WT3_1dpi	22	0.3	0	0	OOR <	*0.66			1
IL-3 (14)	X4	D3	0	WT4_1dpi	19	-2.8	0	0	OOR <	*0.14			1
IL-3 (14)	X5	E3	0	WT5_1dpi	22	0.3	0	0	OOR <	*0.66			1
IL-3 (14)	X6	F3	0	RH1_6dpi	29	7.3	0	0	1.99	1.99			1
IL-3 (14)	X7	G3	0	RHEV1_6dpi	42	20.3	0	0	4.59	4.59			1
IL-3 (14)	X8	H3	0	EV1_6dpi	29.5	7.8	0	0	2.09	2.09			1
IL-3 (14)	X9	A4	0	RH1_1dpi	21	-0.8	0	0	OOR <	*0.48			1
IL-3 (14)	X10	B4	0	RH2_1dpi	25.5	3.8	0	0	1.32	1.32			1
IL-3 (14)	X11	C4	0	RH3_1dpi	29	7.3	0	0	1.99	1.99			1
IL-3 (14)	X12	D4	0	RH4_1dpi	24	2.3	0	0	OOR <	*1.03			1
IL-3 (14)	X13	E4	0	RH5_1dpi	22	0.3	0	0	OOR <	*0.66			1
IL-3 (14)	X14	F4	0	RH2_6dpi	39	17.3	0	0	3.98	3.98			1
IL-3 (14)	X15	G4	0	RHEV2_6dpi	46	24.3	0	0	5.41	5.41			1
IL-3 (14)	X16	H4	0	EV2_6dpi	31	9.3	0	0	2.38	2.38			1
IL-3 (14)	X17	A5	0	RHEV1_1dpi	24	2.3	0	0	OOR <	*1.03			1
IL-3 (14)	X18	B5	0	RHEV2_1dpi	24	2.3	0	0	OOR <	*1.03			1
IL-3 (14)	X19	C5	0	RHEV3_1dpi	29.5	7.8	0	0	2.09	2.09			1
IL-3 (14)	X20	D5	0	RHEV4_1dpi	27	5.3	0	0	1.6	1.6			1
IL-3 (14)	X21	E5	0	RHEV5_1dpi	39	17.3	0	0	3.98	3.98			1
IL-3 (14)	X22	F5	0	RH3_6dpi	33	11.3	0	0	2.77	2.77			1
IL-3 (14)	X23	G5	0	RHEV3_6dpi	33	11.3	0	0	2.77	2.77			1
IL-3 (14)	X24	H5	0	EV3_6dpi	26.5	4.8	0	0	1.51	1.51			1
IL-3 (14)	X25	A6	0	EV1_1dpi	21	-0.8	0	0	OOR <	*0.48			1
IL-3 (14)	X26	B6	0	EV2_1dpi	25	3.3	0	0	1.22	1.22			1
IL-3 (14)	X27	C6	0	EV3_1dpi	25	3.3	0	0	1.22	1.22			1
IL-3 (14)	X28	D6	0	EV4_1dpi	28	6.3	0	0	1.79	1.79			1
IL-3 (14)	X29	E6	0	EV5_1dpi	21	-0.8	0	0	OOR <	*0.48			1
IL-3 (14)	X30	F6	0	RH4_6dpi	36	14.3	0	0	3.37	3.37			1
IL-3 (14)	X31	G6	0	RHEV4_6dpi	74	52.3	0	0	11.34	11.34			1
IL-3 (14)	X32	H6	0	EV4_6dpi	41	19.3	0	0	4.38	4.38			1
IL-3 (14)	X33	A7	0	MK1	23	1.3	0	0	OOR <	*0.85			1
IL-3 (14)	X34	B7	0	MK2	20	-1.8	0	0	OOR <	*0.31			1
IL-3 (14)	X35	C7	0	MK3	20.5	-1.3	0	0	OOR <	*0.39			1
IL-3 (14)	X36	D7	0	MK4	23.5	1.8	0	0	OOR <	*0.94			1
IL-3 (14)	X37	E7	0	MK5	20	-1.8	0	0	OOR <	*0.31			1
IL-3 (14)	X38	F7	0	RH5_6dpi	32	10.3	0	0	2.58	2.58			1
IL-3 (14)	X39	G7	0	RHEV5_6dpi	30	8.3	0	0	2.18	2.18			1
IL-3 (14)	X40	H7	0	EV5_6dpi	27	5.3	0	0	1.6	1.6			1
IL-3 (14)	X41	A8	0	WT1_2dpi	27.5	5.8	0	0	1.7	1.7			1
IL-3 (14)	X42	B8	0	WT2_2dpi	27	5.3	0	0	1.6	1.6			1
IL-3 (14)	X43	C8	0	WT3_2dpi	37	15.3	0	0	3.57	3.57			1
IL-3 (14)	X44	D8	0	WT4_2dpi	43	21.3	0	0	4.79	4.79			1
IL-3 (14)	X45	E8	0	WT5_2dpi	22	0.3	0	0	OOR <	*0.66			1
IL-3 (14)	X46	F8	0	G1_WT1	78.5	56.8	0	0	12.31	12.31			1
IL-3 (14)	X47	G8	0	G1_WT2	42	20.3	0	0	4.59	4.59			1
IL-3 (14)	X48	H8	0	G1_WT3	64	42.3	0	0	9.19	9.19			1
IL-3 (14)	X49	A9	0	RH1_2dpi	32.5	10.8	0	0	2.68	2.68			1
IL-3 (14)	X50	B9	0	RH2_2dpi	39	17.3	0	0	3.98	3.98			1
IL-3 (14)	X51	C9	0	RH3_2dpi	24.5	2.8	0	0	OOR <	*1.13			1
IL-3 (14)	X52	D9	0	RH4_2dpi	33	11.3	0	0	2.77	2.77			1
IL-3 (14)	X53	E9	0	RH5_2dpi	30.5	8.8	0	0	2.28	2.28			1
IL-3 (14)	X54	F9	0	G1_Vip1	46.5	24.8	0	0	5.51	5.51			1
IL-3 (14)	X55	G9	0	G1_Vip2	39	17.3	0	0	3.98	3.98			1
IL-3 (14)	X56	H9	0	G1_Vip3	55	33.3	0	0	7.29	7.29			1
IL-3 (14)	X57	A10	0	RHEV1_2dpi	28	6.3	0	0	1.79	1.79			1
IL-3 (14)	X58	B10	0	RHEV2_2dpi	31	9.3	0	0	2.38	2.38			1
IL-3 (14)	X59	C10	0	RHEV3_2dpi	33	11.3	0	0	2.77	2.77			1
IL-3 (14)	X60	D10	0	RHEV4_2dpi	42	20.3	0	0	4.59	4.59			1
IL-3 (14)	X61	E10	0	RHEV5_2dpi	27	5.3	0	0	1.6	1.6			1
IL-3 (14)	X62	F10	0	G2_WT1	50	28.3	0	0	6.24	6.24			1
IL-3 (14)	X63	G10	0	G2_WT2	47	25.3	0	0	5.62	5.62			1
IL-3 (14)	X64	H10	0	G2_WT3	37	15.3	0	0	3.57	3.57			1
IL-3 (14)	X65	A11	0	EV1_2dpi	19.5	-2.3	0	0	OOR <	*0.22			1
IL-3 (14)	X66	B11	0	EV2_2dpi	35.5	13.8	0	0	3.27	3.27			1
IL-3 (14)	X67	C11	0	EV3_2dpi	29	7.3	0	0	1.99	1.99			1
IL-3 (14)	X68	D11	0	EV4_2dpi	30	8.3	0	0	2.18	2.18			1
IL-3 (14)	X69	E11	0	EV5_2dpi	28	6.3	0	0	1.79	1.79			1
IL-3 (14)	X70	F11	0	G2_WT4	84.5	62.8	0	0	13.62	13.62			1
IL-3 (14)	X71	G11	0	G2_Vip1	160	138.3	0	0	30.55	30.55			1
IL-3 (14)	X72	H11	0	G2_Vip2	26	4.3	0	0	1.41	1.41			1
IL-3 (14)	X73	A12	0	WT1_6dpi	26	4.3	0	0	1.41	1.41			1
IL-3 (14)	X74	B12	0	WT2_6dpi	25.5	3.8	0	0	1.32	1.32			1
IL-3 (14)	X75	C12	0	WT3_6dpi	20.5	-1.3	0	0	OOR <	*0.39			1
IL-3 (14)	X76	D12	0	WT4_6dpi	23	1.3	0	0	OOR <	*0.85			1
IL-3 (14)	X77	E12	0	WT5_6dpi	22.5	0.8	0	0	OOR <	*0.75			1
IL-3 (14)	X78	F12	0	G2_Vip3	24	2.3	0	0	OOR <	*1.03			1
IL-3 (14)	X79	G12	0	G2_Vip4	59.5	37.8	0	0	8.24	8.24			1
IL-3 (14)	X80	H12	0	G2_Vip5	38	16.3	0	0	3.78	3.78			1
Analyte	Type	Well	Outlier	Description	FI	FI - Bkgd	Std Dev	%CV	Conc in Range	Obs Conc	Exp Conc	(Obs/Exp) * 100	Dilution	Bead Count
IL-3 (14)	B	H1	0	Reagent Name: Background0	29.5	29.5							1	50
IL-3 (14)	B	H2	0	Reagent Name: Background0	14	14							1	50
IL-3 (14)	S1	G1	1	Reagent Name: Standard1	20	-1.8					0.34		1	60
IL-3 (14)	S1	G2	1	Reagent Name: Standard1	21	-0.8					0.34		1	65
IL-3 (14)	S2	F1	0	Reagent Name: Standard2	25	3.3			1.22	1.22	1.37	89	1	67
IL-3 (14)	S2	F2	1	Reagent Name: Standard2	61	39.3					1.37		1	56
IL-3 (14)	S3	E1	1	Reagent Name: Standard3	74.5	52.8					5.47		1	50
IL-3 (14)	S3	E2	0	Reagent Name: Standard3	50.5	28.8			6.34	6.34	5.47	116	1	76
IL-3 (14)	S4	D1	0	Reagent Name: Standard4	109	87.3			19.02	19.02	21.88	87	1	55
IL-3 (14)	S4	D2	0	Reagent Name: Standard4	120	98.3			21.48	21.48	21.88	98	1	70
IL-3 (14)	S5	C1	0	Reagent Name: Standard5	448	426.3			99.31	99.31	87.5	113	1	69
IL-3 (14)	S5	C2	0	Reagent Name: Standard5	368	346.3			79.78	79.78	87.5	91	1	55
IL-3 (14)	S6	B1	0	Reagent Name: Standard6	1448	1426.3			356.79	356.79	350	102	1	74
IL-3 (14)	S6	B2	0	Reagent Name: Standard6	1398	1376.3			343.5	343.5	350	98	1	70
IL-3 (14)	S7	A1	0	Reagent Name: Standard7	3826	3804.3			1349.24	1349.24	1400	96	1	73
IL-3 (14)	S7	A2	0	Reagent Name: Standard7	3881	3859.3			OOR >	*1462.04	1400	104	1	53
IL-3 (14)	X1	A3	0	WT1_1dpi	26	4.3			1.41	1.41			1	84
IL-3 (14)	X2	B3	0	WT2_1dpi	27.5	5.8			1.7	1.7			1	178
IL-3 (14)	X3	C3	0	WT3_1dpi	22	0.3			OOR <	*0.66			1	145
IL-3 (14)	X4	D3	0	WT4_1dpi	19	-2.8			OOR <	*0.14			1	95
IL-3 (14)	X5	E3	0	WT5_1dpi	22	0.3			OOR <	*0.66			1	120
IL-3 (14)	X6	F3	0	RH1_6dpi	29	7.3			1.99	1.99			1	114
IL-3 (14)	X7	G3	0	RHEV1_6dpi	42	20.3			4.59	4.59			1	91
IL-3 (14)	X8	H3	0	EV1_6dpi	29.5	7.8			2.09	2.09			1	192
IL-3 (14)	X9	A4	0	RH1_1dpi	21	-0.8			OOR <	*0.48			1	145
IL-3 (14)	X10	B4	0	RH2_1dpi	25.5	3.8			1.32	1.32			1	100
IL-3 (14)	X11	C4	0	RH3_1dpi	29	7.3			1.99	1.99			1	144
IL-3 (14)	X12	D4	0	RH4_1dpi	24	2.3			OOR <	*1.03			1	124
IL-3 (14)	X13	E4	0	RH5_1dpi	22	0.3			OOR <	*0.66			1	186
IL-3 (14)	X14	F4	0	RH2_6dpi	39	17.3			3.98	3.98			1	127
IL-3 (14)	X15	G4	0	RHEV2_6dpi	46	24.3			5.41	5.41			1	87
IL-3 (14)	X16	H4	0	EV2_6dpi	31	9.3			2.38	2.38			1	111
IL-3 (14)	X17	A5	0	RHEV1_1dpi	24	2.3			OOR <	*1.03			1	77
IL-3 (14)	X18	B5	0	RHEV2_1dpi	24	2.3			OOR <	*1.03			1	123
IL-3 (14)	X19	C5	0	RHEV3_1dpi	29.5	7.8			2.09	2.09			1	104
IL-3 (14)	X20	D5	0	RHEV4_1dpi	27	5.3			1.6	1.6			1	106
IL-3 (14)	X21	E5	0	RHEV5_1dpi	39	17.3			3.98	3.98			1	214
IL-3 (14)	X22	F5	0	RH3_6dpi	33	11.3			2.77	2.77			1	69
IL-3 (14)	X23	G5	0	RHEV3_6dpi	33	11.3			2.77	2.77			1	105
IL-3 (14)	X24	H5	0	EV3_6dpi	26.5	4.8			1.51	1.51			1	128
IL-3 (14)	X25	A6	0	EV1_1dpi	21	-0.8			OOR <	*0.48			1	134
IL-3 (14)	X26	B6	0	EV2_1dpi	25	3.3			1.22	1.22			1	103
IL-3 (14)	X27	C6	0	EV3_1dpi	25	3.3			1.22	1.22			1	136
IL-3 (14)	X28	D6	0	EV4_1dpi	28	6.3			1.79	1.79			1	122
IL-3 (14)	X29	E6	0	EV5_1dpi	21	-0.8			OOR <	*0.48			1	219
IL-3 (14)	X30	F6	0	RH4_6dpi	36	14.3			3.37	3.37			1	113
IL-3 (14)	X31	G6	0	RHEV4_6dpi	74	52.3			11.34	11.34			1	163
IL-3 (14)	X32	H6	0	EV4_6dpi	41	19.3			4.38	4.38			1	56
IL-3 (14)	X33	A7	0	MK1	23	1.3			OOR <	*0.85			1	88
IL-3 (14)	X34	B7	0	MK2	20	-1.8			OOR <	*0.31			1	127
IL-3 (14)	X35	C7	0	MK3	20.5	-1.3			OOR <	*0.39			1	154
IL-3 (14)	X36	D7	0	MK4	23.5	1.8			OOR <	*0.94			1	110
IL-3 (14)	X37	E7	0	MK5	20	-1.8			OOR <	*0.31			1	163
IL-3 (14)	X38	F7	0	RH5_6dpi	32	10.3			2.58	2.58			1	116
IL-3 (14)	X39	G7	0	RHEV5_6dpi	30	8.3			2.18	2.18			1	69
IL-3 (14)	X40	H7	0	EV5_6dpi	27	5.3			1.6	1.6			1	100
IL-3 (14)	X41	A8	0	WT1_2dpi	27.5	5.8			1.7	1.7			1	116
IL-3 (14)	X42	B8	0	WT2_2dpi	27	5.3			1.6	1.6			1	105
IL-3 (14)	X43	C8	0	WT3_2dpi	37	15.3			3.57	3.57			1	141
IL-3 (14)	X44	D8	0	WT4_2dpi	43	21.3			4.79	4.79			1	142
IL-3 (14)	X45	E8	0	WT5_2dpi	22	0.3			OOR <	*0.66			1	126
IL-3 (14)	X46	F8	0	G1_WT1	78.5	56.8			12.31	12.31			1	92
IL-3 (14)	X47	G8	0	G1_WT2	42	20.3			4.59	4.59			1	102
IL-3 (14)	X48	H8	0	G1_WT3	64	42.3			9.19	9.19			1	139
IL-3 (14)	X49	A9	0	RH1_2dpi	32.5	10.8			2.68	2.68			1	142
IL-3 (14)	X50	B9	0	RH2_2dpi	39	17.3			3.98	3.98			1	225
IL-3 (14)	X51	C9	0	RH3_2dpi	24.5	2.8			OOR <	*1.13			1	126
IL-3 (14)	X52	D9	0	RH4_2dpi	33	11.3			2.77	2.77			1	109
IL-3 (14)	X53	E9	0	RH5_2dpi	30.5	8.8			2.28	2.28			1	174
IL-3 (14)	X54	F9	0	G1_Vip1	46.5	24.8			5.51	5.51			1	82
IL-3 (14)	X55	G9	0	G1_Vip2	39	17.3			3.98	3.98			1	74
IL-3 (14)	X56	H9	0	G1_Vip3	55	33.3			7.29	7.29			1	66
IL-3 (14)	X57	A10	0	RHEV1_2dpi	28	6.3			1.79	1.79			1	150
IL-3 (14)	X58	B10	0	RHEV2_2dpi	31	9.3			2.38	2.38			1	160
IL-3 (14)	X59	C10	0	RHEV3_2dpi	33	11.3			2.77	2.77			1	199
IL-3 (14)	X60	D10	0	RHEV4_2dpi	42	20.3			4.59	4.59			1	91
IL-3 (14)	X61	E10	0	RHEV5_2dpi	27	5.3			1.6	1.6			1	149
IL-3 (14)	X62	F10	0	G2_WT1	50	28.3			6.24	6.24			1	151
IL-3 (14)	X63	G10	0	G2_WT2	47	25.3			5.62	5.62			1	131
IL-3 (14)	X64	H10	0	G2_WT3	37	15.3			3.57	3.57			1	135
IL-3 (14)	X65	A11	0	EV1_2dpi	19.5	-2.3			OOR <	*0.22			1	100
IL-3 (14)	X66	B11	0	EV2_2dpi	35.5	13.8			3.27	3.27			1	118
IL-3 (14)	X67	C11	0	EV3_2dpi	29	7.3			1.99	1.99			1	115
IL-3 (14)	X68	D11	0	EV4_2dpi	30	8.3			2.18	2.18			1	98
IL-3 (14)	X69	E11	0	EV5_2dpi	28	6.3			1.79	1.79			1	80
IL-3 (14)	X70	F11	0	G2_WT4	84.5	62.8			13.62	13.62			1	132
IL-3 (14)	X71	G11	0	G2_Vip1	160	138.3			30.55	30.55			1	83
IL-3 (14)	X72	H11	0	G2_Vip2	26	4.3			1.41	1.41			1	73
IL-3 (14)	X73	A12	0	WT1_6dpi	26	4.3			1.41	1.41			1	88
IL-3 (14)	X74	B12	0	WT2_6dpi	25.5	3.8			1.32	1.32			1	100
IL-3 (14)	X75	C12	0	WT3_6dpi	20.5	-1.3			OOR <	*0.39			1	106
IL-3 (14)	X76	D12	0	WT4_6dpi	23	1.3			OOR <	*0.85			1	129
IL-3 (14)	X77	E12	0	WT5_6dpi	22.5	0.8			OOR <	*0.75			1	64
IL-3 (14)	X78	F12	0	G2_Vip3	24	2.3			OOR <	*1.03			1	85
IL-3 (14)	X79	G12	0	G2_Vip4	59.5	37.8			8.24	8.24			1	152
IL-3 (14)	X80	H12	0	G2_Vip5	38	16.3			3.78	3.78			1	118
*** = Value not available; --- = Designated as an outlier
*Value = Value extrapolated beyond standard range
OOR = Out of Range; OOR> = Out of Range Above; OOR< = Out of Range Below
Exp Conc = Expected Concentration; Obs Conc = Observed Concentration
Conc in Range = Unknown sample concentrations within range where standards recovery is 80-120%
Conc In Range = 1.220 to 1399.992 (equivalent to 3.3 to 3831.8 FI - Bkgd)
Regression Type: Logistic - 5PL
Std. Curve: FI = -3.62072 + (3982.75 + 3.62072) / ((1 + (Conc / 1060.98)^-5.18635))^0.181291
FitProb. = 0.0745, ResVar. = 3.1812

## Sheet: LIF (18)
File Name: O:\SIgNLab\Immuno Monitoring\Luminex results\301-400\Lisa\2017-11-16 YiHao\YiHao_Procarta_36-plex_20171116_20171116_130300.rbx
Analyte: LIF (18)
Acquisition Date: 16-Nov-2017, 12:25 PM
Reader Serial Number: FM3DD10333001
Plate ID:
RP1 PMT (Volts): 520.97
RP1 Target: NA
Analyte	Type	Well	Outlier	Description	FI	FI - Bkgd	Std Dev	%CV	Conc in Range	Obs Conc	Exp Conc	(Obs/Exp) * 100	Dilution	Bead Count
LIF (18)	B	H1,H2	0	Reagent Name: Background0	15.5	15.5	2.12	13.69					1
LIF (18)	S1	G1,G2	0	Reagent Name: Standard1	24.3	8.8	0.35	1.46	1.86	1.86	2.23	83	1
LIF (18)	S2	F1,F2	0	Reagent Name: Standard2	42	26.5	1.41	3.37	9.55	9.55	8.94	107	1
LIF (18)	S3	E1,E2	0	Reagent Name: Standard3	121	105.5	7.07	5.84	38.5	38.5	35.74	108	1
LIF (18)	S4	D1,D2	0	Reagent Name: Standard4	407.5	392	10.61	2.6	129.72	129.72	142.97	91	1
LIF (18)	S5	C1,C2	0	Reagent Name: Standard5	2077	2061.5	312.54	15.05	616.3	616.3	571.88	108	1
LIF (18)	S6	B1,B2	0	Reagent Name: Standard6	5474.5	5459	143.54	2.62	2176.82	2176.82	2287.5	95	1
LIF (18)	S7	A1,A2	2	Reagent Name: Standard7	7513.5	7498	0	0	OOR >	11197.1	9150	122	1
LIF (18)	X1	A3	0	WT1_1dpi	112	96.5	0	0	35.38	35.38			1
LIF (18)	X2	B3	0	WT2_1dpi	93	77.5	0	0	28.69	28.69			1
LIF (18)	X3	C3	0	WT3_1dpi	83	67.5	0	0	25.1	25.1			1
LIF (18)	X4	D3	0	WT4_1dpi	80	64.5	0	0	24.01	24.01			1
LIF (18)	X5	E3	0	WT5_1dpi	99	83.5	0	0	30.82	30.82			1
LIF (18)	X6	F3	0	RH1_6dpi	145	129.5	0	0	46.69	46.69			1
LIF (18)	X7	G3	0	RHEV1_6dpi	205	189.5	0	0	66.53	66.53			1
LIF (18)	X8	H3	0	EV1_6dpi	155	139.5	0	0	50.05	50.05			1
LIF (18)	X9	A4	0	RH1_1dpi	102.5	87	0	0	32.06	32.06			1
LIF (18)	X10	B4	0	RH2_1dpi	87	71.5	0	0	26.54	26.54			1
LIF (18)	X11	C4	0	RH3_1dpi	105	89.5	0	0	32.94	32.94			1
LIF (18)	X12	D4	0	RH4_1dpi	102	86.5	0	0	31.88	31.88			1
LIF (18)	X13	E4	0	RH5_1dpi	99	83.5	0	0	30.82	30.82			1
LIF (18)	X14	F4	0	RH2_6dpi	136.5	121	0	0	43.81	43.81			1
LIF (18)	X15	G4	0	RHEV2_6dpi	204.5	189	0	0	66.36	66.36			1
LIF (18)	X16	H4	0	EV2_6dpi	175.5	160	0	0	56.87	56.87			1
LIF (18)	X17	A5	0	RHEV1_1dpi	81	65.5	0	0	24.37	24.37			1
LIF (18)	X18	B5	0	RHEV2_1dpi	63	47.5	0	0	17.72	17.72			1
LIF (18)	X19	C5	0	RHEV3_1dpi	77	61.5	0	0	22.91	22.91			1
LIF (18)	X20	D5	0	RHEV4_1dpi	82	66.5	0	0	24.73	24.73			1
LIF (18)	X21	E5	0	RHEV5_1dpi	46	30.5	0	0	11.15	11.15			1
LIF (18)	X22	F5	0	RH3_6dpi	133	117.5	0	0	42.62	42.62			1
LIF (18)	X23	G5	0	RHEV3_6dpi	138	122.5	0	0	44.32	44.32			1
LIF (18)	X24	H5	0	EV3_6dpi	133	117.5	0	0	42.62	42.62			1
LIF (18)	X25	A6	0	EV1_1dpi	78	62.5	0	0	23.28	23.28			1
LIF (18)	X26	B6	0	EV2_1dpi	83	67.5	0	0	25.1	25.1			1
LIF (18)	X27	C6	0	EV3_1dpi	70.5	55	0	0	20.52	20.52			1
LIF (18)	X28	D6	0	EV4_1dpi	75	59.5	0	0	22.18	22.18			1
LIF (18)	X29	E6	0	EV5_1dpi	62	46.5	0	0	17.34	17.34			1
LIF (18)	X30	F6	0	RH4_6dpi	142	126.5	0	0	45.68	45.68			1
LIF (18)	X31	G6	0	RHEV4_6dpi	154	138.5	0	0	49.72	49.72			1
LIF (18)	X32	H6	0	EV4_6dpi	135.5	120	0	0	43.47	43.47			1
LIF (18)	X33	A7	0	MK1	66	50.5	0	0	18.84	18.84			1
LIF (18)	X34	B7	0	MK2	78	62.5	0	0	23.28	23.28			1
LIF (18)	X35	C7	0	MK3	79	63.5	0	0	23.64	23.64			1
LIF (18)	X36	D7	0	MK4	75.5	60	0	0	22.36	22.36			1
LIF (18)	X37	E7	0	MK5	71.5	56	0	0	20.89	20.89			1
LIF (18)	X38	F7	0	RH5_6dpi	146	130.5	0	0	47.03	47.03			1
LIF (18)	X39	G7	0	RHEV5_6dpi	153.5	138	0	0	49.55	49.55			1
LIF (18)	X40	H7	0	EV5_6dpi	118	102.5	0	0	37.47	37.47			1
LIF (18)	X41	A8	0	WT1_2dpi	189	173.5	0	0	61.31	61.31			1
LIF (18)	X42	B8	0	WT2_2dpi	180	164.5	0	0	58.35	58.35			1
LIF (18)	X43	C8	0	WT3_2dpi	133	117.5	0	0	42.62	42.62			1
LIF (18)	X44	D8	0	WT4_2dpi	182	166.5	0	0	59.01	59.01			1
LIF (18)	X45	E8	0	WT5_2dpi	131	115.5	0	0	41.94	41.94			1
LIF (18)	X46	F8	0	G1_WT1	112	96.5	0	0	35.38	35.38			1
LIF (18)	X47	G8	0	G1_WT2	123.5	108	0	0	39.36	39.36			1
LIF (18)	X48	H8	0	G1_WT3	120.5	105	0	0	38.33	38.33			1
LIF (18)	X49	A9	0	RH1_2dpi	119	103.5	0	0	37.81	37.81			1
LIF (18)	X50	B9	0	RH2_2dpi	154	138.5	0	0	49.72	49.72			1
LIF (18)	X51	C9	0	RH3_2dpi	131	115.5	0	0	41.94	41.94			1
LIF (18)	X52	D9	0	RH4_2dpi	142	126.5	0	0	45.68	45.68			1
LIF (18)	X53	E9	0	RH5_2dpi	114	98.5	0	0	36.08	36.08			1
LIF (18)	X54	F9	0	G1_Vip1	93	77.5	0	0	28.69	28.69			1
LIF (18)	X55	G9	0	G1_Vip2	109	93.5	0	0	34.34	34.34			1
LIF (18)	X56	H9	0	G1_Vip3	102	86.5	0	0	31.88	31.88			1
LIF (18)	X57	A10	0	RHEV1_2dpi	121	105.5	0	0	38.5	38.5			1
LIF (18)	X58	B10	0	RHEV2_2dpi	165	149.5	0	0	53.39	53.39			1
LIF (18)	X59	C10	0	RHEV3_2dpi	134	118.5	0	0	42.96	42.96			1
LIF (18)	X60	D10	0	RHEV4_2dpi	152.5	137	0	0	49.21	49.21			1
LIF (18)	X61	E10	0	RHEV5_2dpi	105	89.5	0	0	32.94	32.94			1
LIF (18)	X62	F10	0	G2_WT1	118	102.5	0	0	37.47	37.47			1
LIF (18)	X63	G10	0	G2_WT2	142	126.5	0	0	45.68	45.68			1
LIF (18)	X64	H10	0	G2_WT3	97	81.5	0	0	30.11	30.11			1
LIF (18)	X65	A11	0	EV1_2dpi	145	129.5	0	0	46.69	46.69			1
LIF (18)	X66	B11	0	EV2_2dpi	175	159.5	0	0	56.7	56.7			1
LIF (18)	X67	C11	0	EV3_2dpi	169	153.5	0	0	54.72	54.72			1
LIF (18)	X68	D11	0	EV4_2dpi	125	109.5	0	0	39.88	39.88			1
LIF (18)	X69	E11	0	EV5_2dpi	136	120.5	0	0	43.64	43.64			1
LIF (18)	X70	F11	0	G2_WT4	95.5	80	0	0	29.58	29.58			1
LIF (18)	X71	G11	0	G2_Vip1	163	147.5	0	0	52.72	52.72			1
LIF (18)	X72	H11	0	G2_Vip2	141	125.5	0	0	45.34	45.34			1
LIF (18)	X73	A12	0	WT1_6dpi	187.5	172	0	0	60.82	60.82			1
LIF (18)	X74	B12	0	WT2_6dpi	156	140.5	0	0	50.39	50.39			1
LIF (18)	X75	C12	0	WT3_6dpi	134	118.5	0	0	42.96	42.96			1
LIF (18)	X76	D12	0	WT4_6dpi	125	109.5	0	0	39.88	39.88			1
LIF (18)	X77	E12	0	WT5_6dpi	114	98.5	0	0	36.08	36.08			1
LIF (18)	X78	F12	0	G2_Vip3	112	96.5	0	0	35.38	35.38			1
LIF (18)	X79	G12	0	G2_Vip4	145	129.5	0	0	46.69	46.69			1
LIF (18)	X80	H12	0	G2_Vip5	112	96.5	0	0	35.38	35.38			1
Analyte	Type	Well	Outlier	Description	FI	FI - Bkgd	Std Dev	%CV	Conc in Range	Obs Conc	Exp Conc	(Obs/Exp) * 100	Dilution	Bead Count
LIF (18)	B	H1	0	Reagent Name: Background0	14	14							1	105
LIF (18)	B	H2	0	Reagent Name: Background0	17	17							1	72
LIF (18)	S1	G1	0	Reagent Name: Standard1	24	8.5			OOR <	*1.74	2.23	78	1	79
LIF (18)	S1	G2	0	Reagent Name: Standard1	24.5	9			1.98	1.98	2.23	89	1	76
LIF (18)	S2	F1	0	Reagent Name: Standard2	43	27.5			9.95	9.95	8.94	111	1	84
LIF (18)	S2	F2	0	Reagent Name: Standard2	41	25.5			9.14	9.14	8.94	102	1	110
LIF (18)	S3	E1	0	Reagent Name: Standard3	116	100.5			36.77	36.77	35.74	103	1	119
LIF (18)	S3	E2	0	Reagent Name: Standard3	126	110.5			40.22	40.22	35.74	113	1	110
LIF (18)	S4	D1	0	Reagent Name: Standard4	400	384.5			127.45	127.45	142.97	89	1	193
LIF (18)	S4	D2	0	Reagent Name: Standard4	415	399.5			131.99	131.99	142.97	92	1	117
LIF (18)	S5	C1	0	Reagent Name: Standard5	2298	2282.5			683.99	683.99	571.88	120	1	91
LIF (18)	S5	C2	0	Reagent Name: Standard5	1856	1840.5			550.18	550.18	571.88	96	1	66
LIF (18)	S6	B1	0	Reagent Name: Standard6	5576	5560.5			OOR >	2263.55	2287.5	99	1	81
LIF (18)	S6	B2	0	Reagent Name: Standard6	5373	5357.5			2095.21	2095.21	2287.5	92	1	129
LIF (18)	S7	A1	1	Reagent Name: Standard7	7240.5	7225					9150		1	84
LIF (18)	S7	A2	0	Reagent Name: Standard7	7513.5	7498			OOR >	11197.1	9150	122	1	94
LIF (18)	X1	A3	0	WT1_1dpi	112	96.5			35.38	35.38			1	109
LIF (18)	X2	B3	0	WT2_1dpi	93	77.5			28.69	28.69			1	233
LIF (18)	X3	C3	0	WT3_1dpi	83	67.5			25.1	25.1			1	225
LIF (18)	X4	D3	0	WT4_1dpi	80	64.5			24.01	24.01			1	135
LIF (18)	X5	E3	0	WT5_1dpi	99	83.5			30.82	30.82			1	151
LIF (18)	X6	F3	0	RH1_6dpi	145	129.5			46.69	46.69			1	151
LIF (18)	X7	G3	0	RHEV1_6dpi	205	189.5			66.53	66.53			1	108
LIF (18)	X8	H3	0	EV1_6dpi	155	139.5			50.05	50.05			1	301
LIF (18)	X9	A4	0	RH1_1dpi	102.5	87			32.06	32.06			1	186
LIF (18)	X10	B4	0	RH2_1dpi	87	71.5			26.54	26.54			1	154
LIF (18)	X11	C4	0	RH3_1dpi	105	89.5			32.94	32.94			1	162
LIF (18)	X12	D4	0	RH4_1dpi	102	86.5			31.88	31.88			1	145
LIF (18)	X13	E4	0	RH5_1dpi	99	83.5			30.82	30.82			1	204
LIF (18)	X14	F4	0	RH2_6dpi	136.5	121			43.81	43.81			1	170
LIF (18)	X15	G4	0	RHEV2_6dpi	204.5	189			66.36	66.36			1	124
LIF (18)	X16	H4	0	EV2_6dpi	175.5	160			56.87	56.87			1	132
LIF (18)	X17	A5	0	RHEV1_1dpi	81	65.5			24.37	24.37			1	119
LIF (18)	X18	B5	0	RHEV2_1dpi	63	47.5			17.72	17.72			1	132
LIF (18)	X19	C5	0	RHEV3_1dpi	77	61.5			22.91	22.91			1	167
LIF (18)	X20	D5	0	RHEV4_1dpi	82	66.5			24.73	24.73			1	174
LIF (18)	X21	E5	0	RHEV5_1dpi	46	30.5			11.15	11.15			1	277
LIF (18)	X22	F5	0	RH3_6dpi	133	117.5			42.62	42.62			1	139
LIF (18)	X23	G5	0	RHEV3_6dpi	138	122.5			44.32	44.32			1	144
LIF (18)	X24	H5	0	EV3_6dpi	133	117.5			42.62	42.62			1	153
LIF (18)	X25	A6	0	EV1_1dpi	78	62.5			23.28	23.28			1	176
LIF (18)	X26	B6	0	EV2_1dpi	83	67.5			25.1	25.1			1	127
LIF (18)	X27	C6	0	EV3_1dpi	70.5	55			20.52	20.52			1	224
LIF (18)	X28	D6	0	EV4_1dpi	75	59.5			22.18	22.18			1	138
LIF (18)	X29	E6	0	EV5_1dpi	62	46.5			17.34	17.34			1	249
LIF (18)	X30	F6	0	RH4_6dpi	142	126.5			45.68	45.68			1	150
LIF (18)	X31	G6	0	RHEV4_6dpi	154	138.5			49.72	49.72			1	221
LIF (18)	X32	H6	0	EV4_6dpi	135.5	120			43.47	43.47			1	128
LIF (18)	X33	A7	0	MK1	66	50.5			18.84	18.84			1	111
LIF (18)	X34	B7	0	MK2	78	62.5			23.28	23.28			1	132
LIF (18)	X35	C7	0	MK3	79	63.5			23.64	23.64			1	229
LIF (18)	X36	D7	0	MK4	75.5	60			22.36	22.36			1	140
LIF (18)	X37	E7	0	MK5	71.5	56			20.89	20.89			1	170
LIF (18)	X38	F7	0	RH5_6dpi	146	130.5			47.03	47.03			1	160
LIF (18)	X39	G7	0	RHEV5_6dpi	153.5	138			49.55	49.55			1	118
LIF (18)	X40	H7	0	EV5_6dpi	118	102.5			37.47	37.47			1	141
LIF (18)	X41	A8	0	WT1_2dpi	189	173.5			61.31	61.31			1	177
LIF (18)	X42	B8	0	WT2_2dpi	180	164.5			58.35	58.35			1	148
LIF (18)	X43	C8	0	WT3_2dpi	133	117.5			42.62	42.62			1	225
LIF (18)	X44	D8	0	WT4_2dpi	182	166.5			59.01	59.01			1	231
LIF (18)	X45	E8	0	WT5_2dpi	131	115.5			41.94	41.94			1	169
LIF (18)	X46	F8	0	G1_WT1	112	96.5			35.38	35.38			1	147
LIF (18)	X47	G8	0	G1_WT2	123.5	108			39.36	39.36			1	124
LIF (18)	X48	H8	0	G1_WT3	120.5	105			38.33	38.33			1	170
LIF (18)	X49	A9	0	RH1_2dpi	119	103.5			37.81	37.81			1	160
LIF (18)	X50	B9	0	RH2_2dpi	154	138.5			49.72	49.72			1	297
LIF (18)	X51	C9	0	RH3_2dpi	131	115.5			41.94	41.94			1	125
LIF (18)	X52	D9	0	RH4_2dpi	142	126.5			45.68	45.68			1	119
LIF (18)	X53	E9	0	RH5_2dpi	114	98.5			36.08	36.08			1	234
LIF (18)	X54	F9	0	G1_Vip1	93	77.5			28.69	28.69			1	108
LIF (18)	X55	G9	0	G1_Vip2	109	93.5			34.34	34.34			1	122
LIF (18)	X56	H9	0	G1_Vip3	102	86.5			31.88	31.88			1	113
LIF (18)	X57	A10	0	RHEV1_2dpi	121	105.5			38.5	38.5			1	145
LIF (18)	X58	B10	0	RHEV2_2dpi	165	149.5			53.39	53.39			1	184
LIF (18)	X59	C10	0	RHEV3_2dpi	134	118.5			42.96	42.96			1	238
LIF (18)	X60	D10	0	RHEV4_2dpi	152.5	137			49.21	49.21			1	92
LIF (18)	X61	E10	0	RHEV5_2dpi	105	89.5			32.94	32.94			1	170
LIF (18)	X62	F10	0	G2_WT1	118	102.5			37.47	37.47			1	163
LIF (18)	X63	G10	0	G2_WT2	142	126.5			45.68	45.68			1	147
LIF (18)	X64	H10	0	G2_WT3	97	81.5			30.11	30.11			1	141
LIF (18)	X65	A11	0	EV1_2dpi	145	129.5			46.69	46.69			1	109
LIF (18)	X66	B11	0	EV2_2dpi	175	159.5			56.7	56.7			1	167
LIF (18)	X67	C11	0	EV3_2dpi	169	153.5			54.72	54.72			1	150
LIF (18)	X68	D11	0	EV4_2dpi	125	109.5			39.88	39.88			1	125
LIF (18)	X69	E11	0	EV5_2dpi	136	120.5			43.64	43.64			1	110
LIF (18)	X70	F11	0	G2_WT4	95.5	80			29.58	29.58			1	204
LIF (18)	X71	G11	0	G2_Vip1	163	147.5			52.72	52.72			1	150
LIF (18)	X72	H11	0	G2_Vip2	141	125.5			45.34	45.34			1	143
LIF (18)	X73	A12	0	WT1_6dpi	187.5	172			60.82	60.82			1	100
LIF (18)	X74	B12	0	WT2_6dpi	156	140.5			50.39	50.39			1	110
LIF (18)	X75	C12	0	WT3_6dpi	134	118.5			42.96	42.96			1	141
LIF (18)	X76	D12	0	WT4_6dpi	125	109.5			39.88	39.88			1	135
LIF (18)	X77	E12	0	WT5_6dpi	114	98.5			36.08	36.08			1	76
LIF (18)	X78	F12	0	G2_Vip3	112	96.5			35.38	35.38			1	151
LIF (18)	X79	G12	0	G2_Vip4	145	129.5			46.69	46.69			1	264
LIF (18)	X80	H12	0	G2_Vip5	112	96.5			35.38	35.38			1	255
*** = Value not available; --- = Designated as an outlier
*Value = Value extrapolated beyond standard range
OOR = Out of Range; OOR> = Out of Range Above; OOR< = Out of Range Below
Exp Conc = Expected Concentration; Obs Conc = Observed Concentration
Conc in Range = Unknown sample concentrations within range where standards recovery is 80-120%
Conc In Range = 1.860 to 2176.818 (equivalent to 8.8 to 5459.0 FI - Bkgd)
Regression Type: Logistic - 5PL
Std. Curve: FI = 5.33272 + (7658.5 - 5.33272) / ((1 + (Conc / 1880.05)^-1.86242))^0.598699
FitProb. = 0.0196, ResVar. = 3.9305

## Sheet: IL-1 beta (19)
File Name: O:\SIgNLab\Immuno Monitoring\Luminex results\301-400\Lisa\2017-11-16 YiHao\YiHao_Procarta_36-plex_20171116_20171116_130300.rbx
Analyte: IL-1 beta (19)
Acquisition Date: 16-Nov-2017, 12:25 PM
Reader Serial Number: FM3DD10333001
Plate ID:
RP1 PMT (Volts): 520.97
RP1 Target: NA
Analyte	Type	Well	Outlier	Description	FI	FI - Bkgd	Std Dev	%CV	Conc in Range	Obs Conc	Exp Conc	(Obs/Exp) * 100	Dilution	Bead Count
IL-1 beta (19)	B	H1,H2	0	Reagent Name: Background0	14.5	14.5	2.12	14.63					1
IL-1 beta (19)	S1	G1,G2	0	Reagent Name: Standard1	35.5	21	0.71	1.99	1.17	1.17	1.17	100	1
IL-1 beta (19)	S2	F1,F2	0	Reagent Name: Standard2	101	86.5	5.66	5.6	4.67	4.67	4.69	100	1
IL-1 beta (19)	S3	E1,E2	0	Reagent Name: Standard3	388.3	373.8	0.35	0.09	19.3	19.3	18.75	103	1
IL-1 beta (19)	S4	D1,D2	0	Reagent Name: Standard4	1433.5	1419	167.58	11.69	71.85	71.85	75	96	1
IL-1 beta (19)	S5	C1,C2	0	Reagent Name: Standard5	5641.5	5627	635.69	11.27	312.44	312.44	300	104	1
IL-1 beta (19)	S6	B1,B2	0	Reagent Name: Standard6	14168.3	14153.8	866.56	6.12	1166.41	1166.41	1200	97	1
IL-1 beta (19)	S7	A1,A2	2	Reagent Name: Standard7	22951	22936.5	0	0	4916.63	4916.63	4800	102	1
IL-1 beta (19)	X1	A3	0	WT1_1dpi	26	11.5	0	0	OOR <	*0.64			1
IL-1 beta (19)	X2	B3	0	WT2_1dpi	25.5	11	0	0	OOR <	*0.61			1
IL-1 beta (19)	X3	C3	0	WT3_1dpi	23	8.5	0	0	OOR <	*0.47			1
IL-1 beta (19)	X4	D3	0	WT4_1dpi	20.5	6	0	0	OOR <	*0.33			1
IL-1 beta (19)	X5	E3	0	WT5_1dpi	24.5	10	0	0	OOR <	*0.56			1
IL-1 beta (19)	X6	F3	0	RH1_6dpi	55	40.5	0	0	2.23	2.23			1
IL-1 beta (19)	X7	G3	0	RHEV1_6dpi	66	51.5	0	0	2.82	2.82			1
IL-1 beta (19)	X8	H3	0	EV1_6dpi	91	76.5	0	0	4.14	4.14			1
IL-1 beta (19)	X9	A4	0	RH1_1dpi	39.5	25	0	0	1.39	1.39			1
IL-1 beta (19)	X10	B4	0	RH2_1dpi	62	47.5	0	0	2.61	2.61			1
IL-1 beta (19)	X11	C4	0	RH3_1dpi	34	19.5	0	0	OOR <	*1.09			1
IL-1 beta (19)	X12	D4	0	RH4_1dpi	45.5	31	0	0	1.72	1.72			1
IL-1 beta (19)	X13	E4	0	RH5_1dpi	27	12.5	0	0	OOR <	*0.70			1
IL-1 beta (19)	X14	F4	0	RH2_6dpi	47.5	33	0	0	1.83	1.83			1
IL-1 beta (19)	X15	G4	0	RHEV2_6dpi	60	45.5	0	0	2.5	2.5			1
IL-1 beta (19)	X16	H4	0	EV2_6dpi	73.5	59	0	0	3.22	3.22			1
IL-1 beta (19)	X17	A5	0	RHEV1_1dpi	37	22.5	0	0	1.25	1.25			1
IL-1 beta (19)	X18	B5	0	RHEV2_1dpi	34.5	20	0	0	OOR <	*1.12			1
IL-1 beta (19)	X19	C5	0	RHEV3_1dpi	43	28.5	0	0	1.58	1.58			1
IL-1 beta (19)	X20	D5	0	RHEV4_1dpi	39	24.5	0	0	1.36	1.36			1
IL-1 beta (19)	X21	E5	0	RHEV5_1dpi	29	14.5	0	0	OOR <	*0.81			1
IL-1 beta (19)	X22	F5	0	RH3_6dpi	42	27.5	0	0	1.53	1.53			1
IL-1 beta (19)	X23	G5	0	RHEV3_6dpi	43	28.5	0	0	1.58	1.58			1
IL-1 beta (19)	X24	H5	0	EV3_6dpi	66.5	52	0	0	2.85	2.85			1
IL-1 beta (19)	X25	A6	0	EV1_1dpi	24	9.5	0	0	OOR <	*0.53			1
IL-1 beta (19)	X26	B6	0	EV2_1dpi	20.5	6	0	0	OOR <	*0.33			1
IL-1 beta (19)	X27	C6	0	EV3_1dpi	22	7.5	0	0	OOR <	*0.41			1
IL-1 beta (19)	X28	D6	0	EV4_1dpi	21	6.5	0	0	OOR <	*0.36			1
IL-1 beta (19)	X29	E6	0	EV5_1dpi	25	10.5	0	0	OOR <	*0.59			1
IL-1 beta (19)	X30	F6	0	RH4_6dpi	43	28.5	0	0	1.58	1.58			1
IL-1 beta (19)	X31	G6	0	RHEV4_6dpi	66	51.5	0	0	2.82	2.82			1
IL-1 beta (19)	X32	H6	0	EV4_6dpi	75	60.5	0	0	3.3	3.3			1
IL-1 beta (19)	X33	A7	0	MK1	16	1.5	0	0	OOR <	*0.06			1
IL-1 beta (19)	X34	B7	0	MK2	18	3.5	0	0	OOR <	*0.18			1
IL-1 beta (19)	X35	C7	0	MK3	19	4.5	0	0	OOR <	*0.24			1
IL-1 beta (19)	X36	D7	0	MK4	20	5.5	0	0	OOR <	*0.30			1
IL-1 beta (19)	X37	E7	0	MK5	16	1.5	0	0	OOR <	*0.06			1
IL-1 beta (19)	X38	F7	0	RH5_6dpi	42	27.5	0	0	1.53	1.53			1
IL-1 beta (19)	X39	G7	0	RHEV5_6dpi	50	35.5	0	0	1.96	1.96			1
IL-1 beta (19)	X40	H7	0	EV5_6dpi	78.5	64	0	0	3.48	3.48			1
IL-1 beta (19)	X41	A8	0	WT1_2dpi	44	29.5	0	0	1.64	1.64			1
IL-1 beta (19)	X42	B8	0	WT2_2dpi	53	38.5	0	0	2.12	2.12			1
IL-1 beta (19)	X43	C8	0	WT3_2dpi	34.5	20	0	0	OOR <	*1.12			1
IL-1 beta (19)	X44	D8	0	WT4_2dpi	40	25.5	0	0	1.42	1.42			1
IL-1 beta (19)	X45	E8	0	WT5_2dpi	44	29.5	0	0	1.64	1.64			1
IL-1 beta (19)	X46	F8	0	G1_WT1	77	62.5	0	0	3.4	3.4			1
IL-1 beta (19)	X47	G8	0	G1_WT2	76	61.5	0	0	3.35	3.35			1
IL-1 beta (19)	X48	H8	0	G1_WT3	111	96.5	0	0	5.19	5.19			1
IL-1 beta (19)	X49	A9	0	RH1_2dpi	34	19.5	0	0	OOR <	*1.09			1
IL-1 beta (19)	X50	B9	0	RH2_2dpi	41	26.5	0	0	1.47	1.47			1
IL-1 beta (19)	X51	C9	0	RH3_2dpi	45	30.5	0	0	1.69	1.69			1
IL-1 beta (19)	X52	D9	0	RH4_2dpi	57	42.5	0	0	2.34	2.34			1
IL-1 beta (19)	X53	E9	0	RH5_2dpi	42	27.5	0	0	1.53	1.53			1
IL-1 beta (19)	X54	F9	0	G1_Vip1	59	44.5	0	0	2.44	2.44			1
IL-1 beta (19)	X55	G9	0	G1_Vip2	77	62.5	0	0	3.4	3.4			1
IL-1 beta (19)	X56	H9	0	G1_Vip3	60	45.5	0	0	2.5	2.5			1
IL-1 beta (19)	X57	A10	0	RHEV1_2dpi	44	29.5	0	0	1.64	1.64			1
IL-1 beta (19)	X58	B10	0	RHEV2_2dpi	37.5	23	0	0	1.28	1.28			1
IL-1 beta (19)	X59	C10	0	RHEV3_2dpi	39	24.5	0	0	1.36	1.36			1
IL-1 beta (19)	X60	D10	0	RHEV4_2dpi	36	21.5	0	0	1.2	1.2			1
IL-1 beta (19)	X61	E10	0	RHEV5_2dpi	34.5	20	0	0	OOR <	*1.12			1
IL-1 beta (19)	X62	F10	0	G2_WT1	76	61.5	0	0	3.35	3.35			1
IL-1 beta (19)	X63	G10	0	G2_WT2	73	58.5	0	0	3.19	3.19			1
IL-1 beta (19)	X64	H10	0	G2_WT3	61	46.5	0	0	2.55	2.55			1
IL-1 beta (19)	X65	A11	0	EV1_2dpi	42	27.5	0	0	1.53	1.53			1
IL-1 beta (19)	X66	B11	0	EV2_2dpi	43	28.5	0	0	1.58	1.58			1
IL-1 beta (19)	X67	C11	0	EV3_2dpi	40	25.5	0	0	1.42	1.42			1
IL-1 beta (19)	X68	D11	0	EV4_2dpi	45.5	31	0	0	1.72	1.72			1
IL-1 beta (19)	X69	E11	0	EV5_2dpi	37	22.5	0	0	1.25	1.25			1
IL-1 beta (19)	X70	F11	0	G2_WT4	54	39.5	0	0	2.18	2.18			1
IL-1 beta (19)	X71	G11	0	G2_Vip1	86	71.5	0	0	3.88	3.88			1
IL-1 beta (19)	X72	H11	0	G2_Vip2	90.5	76	0	0	4.11	4.11			1
IL-1 beta (19)	X73	A12	0	WT1_6dpi	132	117.5	0	0	6.28	6.28			1
IL-1 beta (19)	X74	B12	0	WT2_6dpi	92	77.5	0	0	4.19	4.19			1
IL-1 beta (19)	X75	C12	0	WT3_6dpi	60	45.5	0	0	2.5	2.5			1
IL-1 beta (19)	X76	D12	0	WT4_6dpi	71	56.5	0	0	3.08	3.08			1
IL-1 beta (19)	X77	E12	0	WT5_6dpi	76.5	62	0	0	3.38	3.38			1
IL-1 beta (19)	X78	F12	0	G2_Vip3	106.5	92	0	0	4.95	4.95			1
IL-1 beta (19)	X79	G12	0	G2_Vip4	83	68.5	0	0	3.72	3.72			1
IL-1 beta (19)	X80	H12	0	G2_Vip5	81	66.5	0	0	3.61	3.61			1
Analyte	Type	Well	Outlier	Description	FI	FI - Bkgd	Std Dev	%CV	Conc in Range	Obs Conc	Exp Conc	(Obs/Exp) * 100	Dilution	Bead Count
IL-1 beta (19)	B	H1	0	Reagent Name: Background0	13	13							1	83
IL-1 beta (19)	B	H2	0	Reagent Name: Background0	16	16							1	66
IL-1 beta (19)	S1	G1	0	Reagent Name: Standard1	36	21.5			1.2	1.2	1.17	102	1	67
IL-1 beta (19)	S1	G2	0	Reagent Name: Standard1	35	20.5			OOR <	*1.14	1.17	98	1	63
IL-1 beta (19)	S2	F1	0	Reagent Name: Standard2	105	90.5			4.87	4.87	4.69	104	1	68
IL-1 beta (19)	S2	F2	0	Reagent Name: Standard2	97	82.5			4.46	4.46	4.69	95	1	68
IL-1 beta (19)	S3	E1	0	Reagent Name: Standard3	388.5	374			19.32	19.32	18.75	103	1	80
IL-1 beta (19)	S3	E2	0	Reagent Name: Standard3	388	373.5			19.29	19.29	18.75	103	1	77
IL-1 beta (19)	S4	D1	0	Reagent Name: Standard4	1552	1537.5			77.89	77.89	75	104	1	100
IL-1 beta (19)	S4	D2	0	Reagent Name: Standard4	1315	1300.5			65.83	65.83	75	88	1	95
IL-1 beta (19)	S5	C1	0	Reagent Name: Standard5	6091	6076.5			342.37	342.37	300	114	1	83
IL-1 beta (19)	S5	C2	0	Reagent Name: Standard5	5192	5177.5			283.49	283.49	300	94	1	56
IL-1 beta (19)	S6	B1	0	Reagent Name: Standard6	14781	14766.5			1266.73	1266.73	1200	106	1	51
IL-1 beta (19)	S6	B2	0	Reagent Name: Standard6	13555.5	13541			1074.21	1074.21	1200	90	1	90
IL-1 beta (19)	S7	A1	1	Reagent Name: Standard7	21017	21002.5					4800		1	76
IL-1 beta (19)	S7	A2	0	Reagent Name: Standard7	22951	22936.5			4916.63	4916.63	4800	102	1	51
IL-1 beta (19)	X1	A3	0	WT1_1dpi	26	11.5			OOR <	*0.64			1	87
IL-1 beta (19)	X2	B3	0	WT2_1dpi	25.5	11			OOR <	*0.61			1	212
IL-1 beta (19)	X3	C3	0	WT3_1dpi	23	8.5			OOR <	*0.47			1	153
IL-1 beta (19)	X4	D3	0	WT4_1dpi	20.5	6			OOR <	*0.33			1	98
IL-1 beta (19)	X5	E3	0	WT5_1dpi	24.5	10			OOR <	*0.56			1	104
IL-1 beta (19)	X6	F3	0	RH1_6dpi	55	40.5			2.23	2.23			1	129
IL-1 beta (19)	X7	G3	0	RHEV1_6dpi	66	51.5			2.82	2.82			1	93
IL-1 beta (19)	X8	H3	0	EV1_6dpi	91	76.5			4.14	4.14			1	279
IL-1 beta (19)	X9	A4	0	RH1_1dpi	39.5	25			1.39	1.39			1	124
IL-1 beta (19)	X10	B4	0	RH2_1dpi	62	47.5			2.61	2.61			1	141
IL-1 beta (19)	X11	C4	0	RH3_1dpi	34	19.5			OOR <	*1.09			1	125
IL-1 beta (19)	X12	D4	0	RH4_1dpi	45.5	31			1.72	1.72			1	106
IL-1 beta (19)	X13	E4	0	RH5_1dpi	27	12.5			OOR <	*0.70			1	159
IL-1 beta (19)	X14	F4	0	RH2_6dpi	47.5	33			1.83	1.83			1	142
IL-1 beta (19)	X15	G4	0	RHEV2_6dpi	60	45.5			2.5	2.5			1	112
IL-1 beta (19)	X16	H4	0	EV2_6dpi	73.5	59			3.22	3.22			1	116
IL-1 beta (19)	X17	A5	0	RHEV1_1dpi	37	22.5			1.25	1.25			1	69
IL-1 beta (19)	X18	B5	0	RHEV2_1dpi	34.5	20			OOR <	*1.12			1	82
IL-1 beta (19)	X19	C5	0	RHEV3_1dpi	43	28.5			1.58	1.58			1	112
IL-1 beta (19)	X20	D5	0	RHEV4_1dpi	39	24.5			1.36	1.36			1	103
IL-1 beta (19)	X21	E5	0	RHEV5_1dpi	29	14.5			OOR <	*0.81			1	139
IL-1 beta (19)	X22	F5	0	RH3_6dpi	42	27.5			1.53	1.53			1	108
IL-1 beta (19)	X23	G5	0	RHEV3_6dpi	43	28.5			1.58	1.58			1	114
IL-1 beta (19)	X24	H5	0	EV3_6dpi	66.5	52			2.85	2.85			1	132
IL-1 beta (19)	X25	A6	0	EV1_1dpi	24	9.5			OOR <	*0.53			1	118
IL-1 beta (19)	X26	B6	0	EV2_1dpi	20.5	6			OOR <	*0.33			1	96
IL-1 beta (19)	X27	C6	0	EV3_1dpi	22	7.5			OOR <	*0.41			1	180
IL-1 beta (19)	X28	D6	0	EV4_1dpi	21	6.5			OOR <	*0.36			1	109
IL-1 beta (19)	X29	E6	0	EV5_1dpi	25	10.5			OOR <	*0.59			1	171
IL-1 beta (19)	X30	F6	0	RH4_6dpi	43	28.5			1.58	1.58			1	126
IL-1 beta (19)	X31	G6	0	RHEV4_6dpi	66	51.5			2.82	2.82			1	176
IL-1 beta (19)	X32	H6	0	EV4_6dpi	75	60.5			3.3	3.3			1	117
IL-1 beta (19)	X33	A7	0	MK1	16	1.5			OOR <	*0.06			1	119
IL-1 beta (19)	X34	B7	0	MK2	18	3.5			OOR <	*0.18			1	134
IL-1 beta (19)	X35	C7	0	MK3	19	4.5			OOR <	*0.24			1	187
IL-1 beta (19)	X36	D7	0	MK4	20	5.5			OOR <	*0.30			1	88
IL-1 beta (19)	X37	E7	0	MK5	16	1.5			OOR <	*0.06			1	148
IL-1 beta (19)	X38	F7	0	RH5_6dpi	42	27.5			1.53	1.53			1	121
IL-1 beta (19)	X39	G7	0	RHEV5_6dpi	50	35.5			1.96	1.96			1	97
IL-1 beta (19)	X40	H7	0	EV5_6dpi	78.5	64			3.48	3.48			1	130
IL-1 beta (19)	X41	A8	0	WT1_2dpi	44	29.5			1.64	1.64			1	124
IL-1 beta (19)	X42	B8	0	WT2_2dpi	53	38.5			2.12	2.12			1	121
IL-1 beta (19)	X43	C8	0	WT3_2dpi	34.5	20			OOR <	*1.12			1	132
IL-1 beta (19)	X44	D8	0	WT4_2dpi	40	25.5			1.42	1.42			1	158
IL-1 beta (19)	X45	E8	0	WT5_2dpi	44	29.5			1.64	1.64			1	117
IL-1 beta (19)	X46	F8	0	G1_WT1	77	62.5			3.4	3.4			1	135
IL-1 beta (19)	X47	G8	0	G1_WT2	76	61.5			3.35	3.35			1	110
IL-1 beta (19)	X48	H8	0	G1_WT3	111	96.5			5.19	5.19			1	141
IL-1 beta (19)	X49	A9	0	RH1_2dpi	34	19.5			OOR <	*1.09			1	106
IL-1 beta (19)	X50	B9	0	RH2_2dpi	41	26.5			1.47	1.47			1	208
IL-1 beta (19)	X51	C9	0	RH3_2dpi	45	30.5			1.69	1.69			1	132
IL-1 beta (19)	X52	D9	0	RH4_2dpi	57	42.5			2.34	2.34			1	111
IL-1 beta (19)	X53	E9	0	RH5_2dpi	42	27.5			1.53	1.53			1	155
IL-1 beta (19)	X54	F9	0	G1_Vip1	59	44.5			2.44	2.44			1	75
IL-1 beta (19)	X55	G9	0	G1_Vip2	77	62.5			3.4	3.4			1	97
IL-1 beta (19)	X56	H9	0	G1_Vip3	60	45.5			2.5	2.5			1	83
IL-1 beta (19)	X57	A10	0	RHEV1_2dpi	44	29.5			1.64	1.64			1	112
IL-1 beta (19)	X58	B10	0	RHEV2_2dpi	37.5	23			1.28	1.28			1	160
IL-1 beta (19)	X59	C10	0	RHEV3_2dpi	39	24.5			1.36	1.36			1	190
IL-1 beta (19)	X60	D10	0	RHEV4_2dpi	36	21.5			1.2	1.2			1	69
IL-1 beta (19)	X61	E10	0	RHEV5_2dpi	34.5	20			OOR <	*1.12			1	164
IL-1 beta (19)	X62	F10	0	G2_WT1	76	61.5			3.35	3.35			1	147
IL-1 beta (19)	X63	G10	0	G2_WT2	73	58.5			3.19	3.19			1	129
IL-1 beta (19)	X64	H10	0	G2_WT3	61	46.5			2.55	2.55			1	122
IL-1 beta (19)	X65	A11	0	EV1_2dpi	42	27.5			1.53	1.53			1	91
IL-1 beta (19)	X66	B11	0	EV2_2dpi	43	28.5			1.58	1.58			1	137
IL-1 beta (19)	X67	C11	0	EV3_2dpi	40	25.5			1.42	1.42			1	128
IL-1 beta (19)	X68	D11	0	EV4_2dpi	45.5	31			1.72	1.72			1	108
IL-1 beta (19)	X69	E11	0	EV5_2dpi	37	22.5			1.25	1.25			1	79
IL-1 beta (19)	X70	F11	0	G2_WT4	54	39.5			2.18	2.18			1	161
IL-1 beta (19)	X71	G11	0	G2_Vip1	86	71.5			3.88	3.88			1	107
IL-1 beta (19)	X72	H11	0	G2_Vip2	90.5	76			4.11	4.11			1	118
IL-1 beta (19)	X73	A12	0	WT1_6dpi	132	117.5			6.28	6.28			1	75
IL-1 beta (19)	X74	B12	0	WT2_6dpi	92	77.5			4.19	4.19			1	115
IL-1 beta (19)	X75	C12	0	WT3_6dpi	60	45.5			2.5	2.5			1	105
IL-1 beta (19)	X76	D12	0	WT4_6dpi	71	56.5			3.08	3.08			1	141
IL-1 beta (19)	X77	E12	0	WT5_6dpi	76.5	62			3.38	3.38			1	64
IL-1 beta (19)	X78	F12	0	G2_Vip3	106.5	92			4.95	4.95			1	92
IL-1 beta (19)	X79	G12	0	G2_Vip4	83	68.5			3.72	3.72			1	179
IL-1 beta (19)	X80	H12	0	G2_Vip5	81	66.5			3.61	3.61			1	160
*** = Value not available; --- = Designated as an outlier
*Value = Value extrapolated beyond standard range
OOR = Out of Range; OOR> = Out of Range Above; OOR< = Out of Range Below
Exp Conc = Expected Concentration; Obs Conc = Observed Concentration
Conc in Range = Unknown sample concentrations within range where standards recovery is 80-120%
Conc In Range = 1.171 to 4916.632 (equivalent to 21.0 to 22936.5 FI - Bkgd)
Regression Type: Logistic - 5PL
Std. Curve: FI = 0.539389 + (27321.7 - 0.539389) / ((1 + (Conc / 1190.82)^-1.11353))^0.933276
FitProb. = 0.4849, ResVar. = 0.7237

## Sheet: IL-2 (20)
File Name: O:\SIgNLab\Immuno Monitoring\Luminex results\301-400\Lisa\2017-11-16 YiHao\YiHao_Procarta_36-plex_20171116_20171116_130300.rbx
Analyte: IL-2 (20)
Acquisition Date: 16-Nov-2017, 12:25 PM
Reader Serial Number: FM3DD10333001
Plate ID:
RP1 PMT (Volts): 520.97
RP1 Target: NA
Analyte	Type	Well	Outlier	Description	FI	FI - Bkgd	Std Dev	%CV	Conc in Range	Obs Conc	Exp Conc	(Obs/Exp) * 100	Dilution	Bead Count
IL-2 (20)	B	H1,H2	0	Reagent Name: Background0	30.3	30.3	8.13	26.88					1
IL-2 (20)	S1	G1,G2	2	Reagent Name: Standard1	46	15.8	0	0	1.34	1.34	1.48	90	1
IL-2 (20)	S2	F1,F2	0	Reagent Name: Standard2	102.5	72.3	9.19	8.97	6.52	6.52	5.91	110	1
IL-2 (20)	S3	E1,E2	0	Reagent Name: Standard3	312.3	282	37.83	12.12	23.32	23.32	23.63	99	1
IL-2 (20)	S4	D1,D2	0	Reagent Name: Standard4	1253.5	1223.3	95.46	7.62	90.17	90.17	94.53	95	1
IL-2 (20)	S5	C1,C2	0	Reagent Name: Standard5	5725.8	5695.5	593.62	10.37	398.19	398.19	378.13	105	1
IL-2 (20)	S6	B1,B2	0	Reagent Name: Standard6	15450.3	15420	927.37	6	1458.46	1458.46	1512.5	96	1
IL-2 (20)	S7	A1,A2	2	Reagent Name: Standard7	23365	23334.8	0	0	6430.06	6430.06	6050	106	1
IL-2 (20)	X1	A3	0	WT1_1dpi	506	475.8	0	0	37.76	37.76			1
IL-2 (20)	X2	B3	0	WT2_1dpi	237	206.8	0	0	17.5	17.5			1
IL-2 (20)	X3	C3	0	WT3_1dpi	289	258.8	0	0	21.54	21.54			1
IL-2 (20)	X4	D3	0	WT4_1dpi	175	144.8	0	0	12.56	12.56			1
IL-2 (20)	X5	E3	0	WT5_1dpi	206.5	176.3	0	0	15.09	15.09			1
IL-2 (20)	X6	F3	0	RH1_6dpi	203	172.8	0	0	14.82	14.82			1
IL-2 (20)	X7	G3	0	RHEV1_6dpi	503	472.8	0	0	37.54	37.54			1
IL-2 (20)	X8	H3	0	EV1_6dpi	264.5	234.3	0	0	19.65	19.65			1
IL-2 (20)	X9	A4	0	RH1_1dpi	88	57.8	0	0	5.25	5.25			1
IL-2 (20)	X10	B4	0	RH2_1dpi	119	88.8	0	0	7.93	7.93			1
IL-2 (20)	X11	C4	0	RH3_1dpi	171	140.8	0	0	12.24	12.24			1
IL-2 (20)	X12	D4	0	RH4_1dpi	196	165.8	0	0	14.26	14.26			1
IL-2 (20)	X13	E4	0	RH5_1dpi	238	207.8	0	0	17.58	17.58			1
IL-2 (20)	X14	F4	0	RH2_6dpi	280.5	250.3	0	0	20.89	20.89			1
IL-2 (20)	X15	G4	0	RHEV2_6dpi	315.5	285.3	0	0	23.57	23.57			1
IL-2 (20)	X16	H4	0	EV2_6dpi	271	240.8	0	0	20.15	20.15			1
IL-2 (20)	X17	A5	0	RHEV1_1dpi	56	25.8	0	0	2.32	2.32			1
IL-2 (20)	X18	B5	0	RHEV2_1dpi	76	45.8	0	0	4.18	4.18			1
IL-2 (20)	X19	C5	0	RHEV3_1dpi	86.5	56.3	0	0	5.12	5.12			1
IL-2 (20)	X20	D5	0	RHEV4_1dpi	322.5	292.3	0	0	24.1	24.1			1
IL-2 (20)	X21	E5	0	RHEV5_1dpi	222	191.8	0	0	16.32	16.32			1
IL-2 (20)	X22	F5	0	RH3_6dpi	224	193.8	0	0	16.48	16.48			1
IL-2 (20)	X23	G5	0	RHEV3_6dpi	263	232.8	0	0	19.53	19.53			1
IL-2 (20)	X24	H5	0	EV3_6dpi	173.5	143.3	0	0	12.44	12.44			1
IL-2 (20)	X25	A6	0	EV1_1dpi	60	29.8	0	0	2.7	2.7			1
IL-2 (20)	X26	B6	0	EV2_1dpi	67	36.8	0	0	3.35	3.35			1
IL-2 (20)	X27	C6	0	EV3_1dpi	71	40.8	0	0	3.72	3.72			1
IL-2 (20)	X28	D6	0	EV4_1dpi	61.5	31.3	0	0	2.84	2.84			1
IL-2 (20)	X29	E6	0	EV5_1dpi	74	43.8	0	0	4	4			1
IL-2 (20)	X30	F6	0	RH4_6dpi	367	336.8	0	0	27.47	27.47			1
IL-2 (20)	X31	G6	0	RHEV4_6dpi	266	235.8	0	0	19.77	19.77			1
IL-2 (20)	X32	H6	0	EV4_6dpi	242	211.8	0	0	17.9	17.9			1
IL-2 (20)	X33	A7	0	MK1	84	53.8	0	0	4.89	4.89			1
IL-2 (20)	X34	B7	0	MK2	83	52.8	0	0	4.81	4.81			1
IL-2 (20)	X35	C7	0	MK3	59.5	29.3	0	0	2.65	2.65			1
IL-2 (20)	X36	D7	0	MK4	58	27.8	0	0	2.51	2.51			1
IL-2 (20)	X37	E7	0	MK5	56	25.8	0	0	2.32	2.32			1
IL-2 (20)	X38	F7	0	RH5_6dpi	283	252.8	0	0	21.08	21.08			1
IL-2 (20)	X39	G7	0	RHEV5_6dpi	279	248.8	0	0	20.77	20.77			1
IL-2 (20)	X40	H7	0	EV5_6dpi	313	282.8	0	0	23.38	23.38			1
IL-2 (20)	X41	A8	0	WT1_2dpi	296	265.8	0	0	22.08	22.08			1
IL-2 (20)	X42	B8	0	WT2_2dpi	174.5	144.3	0	0	12.52	12.52			1
IL-2 (20)	X43	C8	0	WT3_2dpi	202.5	172.3	0	0	14.78	14.78			1
IL-2 (20)	X44	D8	0	WT4_2dpi	318	287.8	0	0	23.76	23.76			1
IL-2 (20)	X45	E8	0	WT5_2dpi	362	331.8	0	0	27.09	27.09			1
IL-2 (20)	X46	F8	0	G1_WT1	235	204.8	0	0	17.35	17.35			1
IL-2 (20)	X47	G8	0	G1_WT2	515	484.8	0	0	38.41	38.41			1
IL-2 (20)	X48	H8	0	G1_WT3	321.5	291.3	0	0	24.03	24.03			1
IL-2 (20)	X49	A9	0	RH1_2dpi	353	322.8	0	0	26.42	26.42			1
IL-2 (20)	X50	B9	0	RH2_2dpi	217	186.8	0	0	15.93	15.93			1
IL-2 (20)	X51	C9	0	RH3_2dpi	213	182.8	0	0	15.61	15.61			1
IL-2 (20)	X52	D9	0	RH4_2dpi	275.5	245.3	0	0	20.5	20.5			1
IL-2 (20)	X53	E9	0	RH5_2dpi	252.5	222.3	0	0	18.72	18.72			1
IL-2 (20)	X54	F9	0	G1_Vip1	186.5	156.3	0	0	13.49	13.49			1
IL-2 (20)	X55	G9	0	G1_Vip2	250.5	220.3	0	0	18.56	18.56			1
IL-2 (20)	X56	H9	0	G1_Vip3	171	140.8	0	0	12.24	12.24			1
IL-2 (20)	X57	A10	0	RHEV1_2dpi	247.5	217.3	0	0	18.33	18.33			1
IL-2 (20)	X58	B10	0	RHEV2_2dpi	346	315.8	0	0	25.89	25.89			1
IL-2 (20)	X59	C10	0	RHEV3_2dpi	363.5	333.3	0	0	27.21	27.21			1
IL-2 (20)	X60	D10	0	RHEV4_2dpi	252.5	222.3	0	0	18.72	18.72			1
IL-2 (20)	X61	E10	0	RHEV5_2dpi	240.5	210.3	0	0	17.78	17.78			1
IL-2 (20)	X62	F10	0	G2_WT1	285.5	255.3	0	0	21.27	21.27			1
IL-2 (20)	X63	G10	0	G2_WT2	236.5	206.3	0	0	17.46	17.46			1
IL-2 (20)	X64	H10	0	G2_WT3	338.5	308.3	0	0	25.32	25.32			1
IL-2 (20)	X65	A11	0	EV1_2dpi	351	320.8	0	0	26.26	26.26			1
IL-2 (20)	X66	B11	0	EV2_2dpi	395.5	365.3	0	0	29.6	29.6			1
IL-2 (20)	X67	C11	0	EV3_2dpi	242	211.8	0	0	17.9	17.9			1
IL-2 (20)	X68	D11	0	EV4_2dpi	512	481.8	0	0	38.19	38.19			1
IL-2 (20)	X69	E11	0	EV5_2dpi	307	276.8	0	0	22.92	22.92			1
IL-2 (20)	X70	F11	0	G2_WT4	214	183.8	0	0	15.69	15.69			1
IL-2 (20)	X71	G11	0	G2_Vip1	380	349.8	0	0	28.44	28.44			1
IL-2 (20)	X72	H11	0	G2_Vip2	434	403.8	0	0	32.47	32.47			1
IL-2 (20)	X73	A12	0	WT1_6dpi	236	205.8	0	0	17.43	17.43			1
IL-2 (20)	X74	B12	0	WT2_6dpi	227	196.8	0	0	16.72	16.72			1
IL-2 (20)	X75	C12	0	WT3_6dpi	293	262.8	0	0	21.85	21.85			1
IL-2 (20)	X76	D12	0	WT4_6dpi	362	331.8	0	0	27.09	27.09			1
IL-2 (20)	X77	E12	0	WT5_6dpi	250	219.8	0	0	18.52	18.52			1
IL-2 (20)	X78	F12	0	G2_Vip3	557	526.8	0	0	41.46	41.46			1
IL-2 (20)	X79	G12	0	G2_Vip4	508	477.8	0	0	37.9	37.9			1
IL-2 (20)	X80	H12	0	G2_Vip5	377	346.8	0	0	28.22	28.22			1
Analyte	Type	Well	Outlier	Description	FI	FI - Bkgd	Std Dev	%CV	Conc in Range	Obs Conc	Exp Conc	(Obs/Exp) * 100	Dilution	Bead Count
IL-2 (20)	B	H1	0	Reagent Name: Background0	24.5	24.5							1	56
IL-2 (20)	B	H2	0	Reagent Name: Background0	36	36							1	63
IL-2 (20)	S1	G1	1	Reagent Name: Standard1	59	28.8					1.48		1	50
IL-2 (20)	S1	G2	0	Reagent Name: Standard1	46	15.8			1.34	1.34	1.48	90	1	50
IL-2 (20)	S2	F1	0	Reagent Name: Standard2	96	65.8			5.95	5.95	5.91	101	1	57
IL-2 (20)	S2	F2	0	Reagent Name: Standard2	109	78.8			7.08	7.08	5.91	120	1	53
IL-2 (20)	S3	E1	0	Reagent Name: Standard3	285.5	255.3			21.27	21.27	23.63	90	1	58
IL-2 (20)	S3	E2	0	Reagent Name: Standard3	339	308.8			25.36	25.36	23.63	107	1	50
IL-2 (20)	S4	D1	0	Reagent Name: Standard4	1321	1290.8			94.78	94.78	94.53	100	1	82
IL-2 (20)	S4	D2	0	Reagent Name: Standard4	1186	1155.8			85.55	85.55	94.53	91	1	65
IL-2 (20)	S5	C1	0	Reagent Name: Standard5	6145.5	6115.3			429.32	429.32	378.13	114	1	50
IL-2 (20)	S5	C2	0	Reagent Name: Standard5	5306	5275.8			367.65	367.65	378.13	97	1	51
IL-2 (20)	S6	B1	0	Reagent Name: Standard6	16106	16075.8			1581.57	1581.57	1512.5	105	1	63
IL-2 (20)	S6	B2	0	Reagent Name: Standard6	14794.5	14764.3			1347.03	1347.03	1512.5	89	1	56
IL-2 (20)	S7	A1	1	Reagent Name: Standard7	21788.5	21758.3					6050		1	58
IL-2 (20)	S7	A2	0	Reagent Name: Standard7	23365	23334.8			6430.06	6430.06	6050	106	1	61
IL-2 (20)	X1	A3	0	WT1_1dpi	506	475.8			37.76	37.76			1	59
IL-2 (20)	X2	B3	0	WT2_1dpi	237	206.8			17.5	17.5			1	83
IL-2 (20)	X3	C3	0	WT3_1dpi	289	258.8			21.54	21.54			1	37
IL-2 (20)	X4	D3	0	WT4_1dpi	175	144.8			12.56	12.56			1	47
IL-2 (20)	X5	E3	0	WT5_1dpi	206.5	176.3			15.09	15.09			1	82
IL-2 (20)	X6	F3	0	RH1_6dpi	203	172.8			14.82	14.82			1	95
IL-2 (20)	X7	G3	0	RHEV1_6dpi	503	472.8			37.54	37.54			1	23
IL-2 (20)	X8	H3	0	EV1_6dpi	264.5	234.3			19.65	19.65			1	42
IL-2 (20)	X9	A4	0	RH1_1dpi	88	57.8			5.25	5.25			1	131
IL-2 (20)	X10	B4	0	RH2_1dpi	119	88.8			7.93	7.93			1	69
IL-2 (20)	X11	C4	0	RH3_1dpi	171	140.8			12.24	12.24			1	78
IL-2 (20)	X12	D4	0	RH4_1dpi	196	165.8			14.26	14.26			1	58
IL-2 (20)	X13	E4	0	RH5_1dpi	238	207.8			17.58	17.58			1	125
IL-2 (20)	X14	F4	0	RH2_6dpi	280.5	250.3			20.89	20.89			1	50
IL-2 (20)	X15	G4	0	RHEV2_6dpi	315.5	285.3			23.57	23.57			1	50
IL-2 (20)	X16	H4	0	EV2_6dpi	271	240.8			20.15	20.15			1	3
IL-2 (20)	X17	A5	0	RHEV1_1dpi	56	25.8			2.32	2.32			1	69
IL-2 (20)	X18	B5	0	RHEV2_1dpi	76	45.8			4.18	4.18			1	85
IL-2 (20)	X19	C5	0	RHEV3_1dpi	86.5	56.3			5.12	5.12			1	102
IL-2 (20)	X20	D5	0	RHEV4_1dpi	322.5	292.3			24.1	24.1			1	50
IL-2 (20)	X21	E5	0	RHEV5_1dpi	222	191.8			16.32	16.32			1	51
IL-2 (20)	X22	F5	0	RH3_6dpi	224	193.8			16.48	16.48			1	50
IL-2 (20)	X23	G5	0	RHEV3_6dpi	263	232.8			19.53	19.53			1	53
IL-2 (20)	X24	H5	0	EV3_6dpi	173.5	143.3			12.44	12.44			1	26
IL-2 (20)	X25	A6	0	EV1_1dpi	60	29.8			2.7	2.7			1	97
IL-2 (20)	X26	B6	0	EV2_1dpi	67	36.8			3.35	3.35			1	97
IL-2 (20)	X27	C6	0	EV3_1dpi	71	40.8			3.72	3.72			1	103
IL-2 (20)	X28	D6	0	EV4_1dpi	61.5	31.3			2.84	2.84			1	90
IL-2 (20)	X29	E6	0	EV5_1dpi	74	43.8			4	4			1	139
IL-2 (20)	X30	F6	0	RH4_6dpi	367	336.8			27.47	27.47			1	36
IL-2 (20)	X31	G6	0	RHEV4_6dpi	266	235.8			19.77	19.77			1	50
IL-2 (20)	X32	H6	0	EV4_6dpi	242	211.8			17.9	17.9			1	5
IL-2 (20)	X33	A7	0	MK1	84	53.8			4.89	4.89			1	96
IL-2 (20)	X34	B7	0	MK2	83	52.8			4.81	4.81			1	93
IL-2 (20)	X35	C7	0	MK3	59.5	29.3			2.65	2.65			1	148
IL-2 (20)	X36	D7	0	MK4	58	27.8			2.51	2.51			1	101
IL-2 (20)	X37	E7	0	MK5	56	25.8			2.32	2.32			1	113
IL-2 (20)	X38	F7	0	RH5_6dpi	283	252.8			21.08	21.08			1	50
IL-2 (20)	X39	G7	0	RHEV5_6dpi	279	248.8			20.77	20.77			1	50
IL-2 (20)	X40	H7	0	EV5_6dpi	313	282.8			23.38	23.38			1	21
IL-2 (20)	X41	A8	0	WT1_2dpi	296	265.8			22.08	22.08			1	50
IL-2 (20)	X42	B8	0	WT2_2dpi	174.5	144.3			12.52	12.52			1	50
IL-2 (20)	X43	C8	0	WT3_2dpi	202.5	172.3			14.78	14.78			1	50
IL-2 (20)	X44	D8	0	WT4_2dpi	318	287.8			23.76	23.76			1	50
IL-2 (20)	X45	E8	0	WT5_2dpi	362	331.8			27.09	27.09			1	50
IL-2 (20)	X46	F8	0	G1_WT1	235	204.8			17.35	17.35			1	85
IL-2 (20)	X47	G8	0	G1_WT2	515	484.8			38.41	38.41			1	50
IL-2 (20)	X48	H8	0	G1_WT3	321.5	291.3			24.03	24.03			1	60
IL-2 (20)	X49	A9	0	RH1_2dpi	353	322.8			26.42	26.42			1	53
IL-2 (20)	X50	B9	0	RH2_2dpi	217	186.8			15.93	15.93			1	39
IL-2 (20)	X51	C9	0	RH3_2dpi	213	182.8			15.61	15.61			1	51
IL-2 (20)	X52	D9	0	RH4_2dpi	275.5	245.3			20.5	20.5			1	50
IL-2 (20)	X53	E9	0	RH5_2dpi	252.5	222.3			18.72	18.72			1	50
IL-2 (20)	X54	F9	0	G1_Vip1	186.5	156.3			13.49	13.49			1	50
IL-2 (20)	X55	G9	0	G1_Vip2	250.5	220.3			18.56	18.56			1	58
IL-2 (20)	X56	H9	0	G1_Vip3	171	140.8			12.24	12.24			1	55
IL-2 (20)	X57	A10	0	RHEV1_2dpi	247.5	217.3			18.33	18.33			1	50
IL-2 (20)	X58	B10	0	RHEV2_2dpi	346	315.8			25.89	25.89			1	47
IL-2 (20)	X59	C10	0	RHEV3_2dpi	363.5	333.3			27.21	27.21			1	50
IL-2 (20)	X60	D10	0	RHEV4_2dpi	252.5	222.3			18.72	18.72			1	50
IL-2 (20)	X61	E10	0	RHEV5_2dpi	240.5	210.3			17.78	17.78			1	50
IL-2 (20)	X62	F10	0	G2_WT1	285.5	255.3			21.27	21.27			1	50
IL-2 (20)	X63	G10	0	G2_WT2	236.5	206.3			17.46	17.46			1	50
IL-2 (20)	X64	H10	0	G2_WT3	338.5	308.3			25.32	25.32			1	50
IL-2 (20)	X65	A11	0	EV1_2dpi	351	320.8			26.26	26.26			1	50
IL-2 (20)	X66	B11	0	EV2_2dpi	395.5	365.3			29.6	29.6			1	50
IL-2 (20)	X67	C11	0	EV3_2dpi	242	211.8			17.9	17.9			1	50
IL-2 (20)	X68	D11	0	EV4_2dpi	512	481.8			38.19	38.19			1	59
IL-2 (20)	X69	E11	0	EV5_2dpi	307	276.8			22.92	22.92			1	55
IL-2 (20)	X70	F11	0	G2_WT4	214	183.8			15.69	15.69			1	50
IL-2 (20)	X71	G11	0	G2_Vip1	380	349.8			28.44	28.44			1	9
IL-2 (20)	X72	H11	0	G2_Vip2	434	403.8			32.47	32.47			1	51
IL-2 (20)	X73	A12	0	WT1_6dpi	236	205.8			17.43	17.43			1	14
IL-2 (20)	X74	B12	0	WT2_6dpi	227	196.8			16.72	16.72			1	23
IL-2 (20)	X75	C12	0	WT3_6dpi	293	262.8			21.85	21.85			1	24
IL-2 (20)	X76	D12	0	WT4_6dpi	362	331.8			27.09	27.09			1	28
IL-2 (20)	X77	E12	0	WT5_6dpi	250	219.8			18.52	18.52			1	5
IL-2 (20)	X78	F12	0	G2_Vip3	557	526.8			41.46	41.46			1	11
IL-2 (20)	X79	G12	0	G2_Vip4	508	477.8			37.9	37.9			1	33
IL-2 (20)	X80	H12	0	G2_Vip5	377	346.8			28.22	28.22			1	26
*** = Value not available; --- = Designated as an outlier
*Value = Value extrapolated beyond standard range
OOR = Out of Range; OOR> = Out of Range Above; OOR< = Out of Range Below
Exp Conc = Expected Concentration; Obs Conc = Observed Concentration
Conc in Range = Unknown sample concentrations within range where standards recovery is 80-120%
Conc In Range = 1.336 to 6430.063 (equivalent to 15.8 to 23334.8 FI - Bkgd)
Regression Type: Logistic - 5PL
Std. Curve: FI = 3.78863 + (25074.2 - 3.78863) / ((1 + (Conc / 1389.59)^-1.48908))^0.739261
FitProb. = 0.2071, ResVar. = 1.5744

## Sheet: M-CSF (21)
File Name: O:\SIgNLab\Immuno Monitoring\Luminex results\301-400\Lisa\2017-11-16 YiHao\YiHao_Procarta_36-plex_20171116_20171116_130300.rbx
Analyte: M-CSF (21)
Acquisition Date: 16-Nov-2017, 12:25 PM
Reader Serial Number: FM3DD10333001
Plate ID:
RP1 PMT (Volts): 520.97
RP1 Target: NA
Analyte	Type	Well	Outlier	Description	FI	FI - Bkgd	Std Dev	%CV	Conc in Range	Obs Conc	Exp Conc	(Obs/Exp) * 100	Dilution	Bead Count
M-CSF (21)	B	H1,H2	0	Reagent Name: Background0	34.3	34.3	1.06	3.1					1
M-CSF (21)	S1	G1,G2	0	Reagent Name: Standard1	43.8	9.5	1.77	4.04	0.19	0.19	0.21	93	1
M-CSF (21)	S2	F1,F2	0	Reagent Name: Standard2	86	51.8	15.56	18.09	0.87	0.87	0.83	105	1
M-CSF (21)	S3	E1,E2	0	Reagent Name: Standard3	255.3	221	8.13	3.19	3.47	3.47	3.32	104	1
M-CSF (21)	S4	D1,D2	0	Reagent Name: Standard4	823.3	789	6.72	0.82	12.09	12.09	13.28	91	1
M-CSF (21)	S5	C1,C2	0	Reagent Name: Standard5	3590.8	3556.5	327.74	9.13	59.18	59.18	53.13	111	1
M-CSF (21)	S6	B1,B2	0	Reagent Name: Standard6	9031.8	8997.5	380.78	4.22	201.15	201.15	212.5	95	1
M-CSF (21)	S7	A1,A2	0	Reagent Name: Standard7	17153.8	17119.5	189.86	1.11	877.61	877.61	850	103	1
M-CSF (21)	X1	A3	0	WT1_1dpi	431	396.8	0	0	6.13	6.13			1
M-CSF (21)	X2	B3	0	WT2_1dpi	324	289.8	0	0	4.51	4.51			1
M-CSF (21)	X3	C3	0	WT3_1dpi	225	190.8	0	0	3.01	3.01			1
M-CSF (21)	X4	D3	0	WT4_1dpi	321	286.8	0	0	4.46	4.46			1
M-CSF (21)	X5	E3	0	WT5_1dpi	315	280.8	0	0	4.37	4.37			1
M-CSF (21)	X6	F3	0	RH1_6dpi	379	344.8	0	0	5.34	5.34			1
M-CSF (21)	X7	G3	0	RHEV1_6dpi	360	325.8	0	0	5.05	5.05			1
M-CSF (21)	X8	H3	0	EV1_6dpi	589	554.8	0	0	8.52	8.52			1
M-CSF (21)	X9	A4	0	RH1_1dpi	415	380.8	0	0	5.88	5.88			1
M-CSF (21)	X10	B4	0	RH2_1dpi	418	383.8	0	0	5.93	5.93			1
M-CSF (21)	X11	C4	0	RH3_1dpi	341	306.8	0	0	4.76	4.76			1
M-CSF (21)	X12	D4	0	RH4_1dpi	371	336.8	0	0	5.22	5.22			1
M-CSF (21)	X13	E4	0	RH5_1dpi	242.5	208.3	0	0	3.27	3.27			1
M-CSF (21)	X14	F4	0	RH2_6dpi	260.5	226.3	0	0	3.55	3.55			1
M-CSF (21)	X15	G4	0	RHEV2_6dpi	361	326.8	0	0	5.07	5.07			1
M-CSF (21)	X16	H4	0	EV2_6dpi	674	639.8	0	0	9.81	9.81			1
M-CSF (21)	X17	A5	0	RHEV1_1dpi	335	300.8	0	0	4.67	4.67			1
M-CSF (21)	X18	B5	0	RHEV2_1dpi	319.5	285.3	0	0	4.44	4.44			1
M-CSF (21)	X19	C5	0	RHEV3_1dpi	342	307.8	0	0	4.78	4.78			1
M-CSF (21)	X20	D5	0	RHEV4_1dpi	268	233.8	0	0	3.66	3.66			1
M-CSF (21)	X21	E5	0	RHEV5_1dpi	241	206.8	0	0	3.25	3.25			1
M-CSF (21)	X22	F5	0	RH3_6dpi	240	205.8	0	0	3.23	3.23			1
M-CSF (21)	X23	G5	0	RHEV3_6dpi	329.5	295.3	0	0	4.59	4.59			1
M-CSF (21)	X24	H5	0	EV3_6dpi	435	400.8	0	0	6.19	6.19			1
M-CSF (21)	X25	A6	0	EV1_1dpi	343	308.8	0	0	4.79	4.79			1
M-CSF (21)	X26	B6	0	EV2_1dpi	297.5	263.3	0	0	4.11	4.11			1
M-CSF (21)	X27	C6	0	EV3_1dpi	349	314.8	0	0	4.89	4.89			1
M-CSF (21)	X28	D6	0	EV4_1dpi	233	198.8	0	0	3.13	3.13			1
M-CSF (21)	X29	E6	0	EV5_1dpi	169.5	135.3	0	0	2.16	2.16			1
M-CSF (21)	X30	F6	0	RH4_6dpi	336	301.8	0	0	4.69	4.69			1
M-CSF (21)	X31	G6	0	RHEV4_6dpi	374	339.8	0	0	5.26	5.26			1
M-CSF (21)	X32	H6	0	EV4_6dpi	792	757.8	0	0	11.61	11.61			1
M-CSF (21)	X33	A7	0	MK1	292	257.8	0	0	4.02	4.02			1
M-CSF (21)	X34	B7	0	MK2	190.5	156.3	0	0	2.48	2.48			1
M-CSF (21)	X35	C7	0	MK3	313.5	279.3	0	0	4.35	4.35			1
M-CSF (21)	X36	D7	0	MK4	193	158.8	0	0	2.52	2.52			1
M-CSF (21)	X37	E7	0	MK5	192	157.8	0	0	2.5	2.5			1
M-CSF (21)	X38	F7	0	RH5_6dpi	283.5	249.3	0	0	3.89	3.89			1
M-CSF (21)	X39	G7	0	RHEV5_6dpi	299.5	265.3	0	0	4.14	4.14			1
M-CSF (21)	X40	H7	0	EV5_6dpi	567	532.8	0	0	8.19	8.19			1
M-CSF (21)	X41	A8	0	WT1_2dpi	296.5	262.3	0	0	4.09	4.09			1
M-CSF (21)	X42	B8	0	WT2_2dpi	344	309.8	0	0	4.81	4.81			1
M-CSF (21)	X43	C8	0	WT3_2dpi	291.5	257.3	0	0	4.02	4.02			1
M-CSF (21)	X44	D8	0	WT4_2dpi	320	285.8	0	0	4.45	4.45			1
M-CSF (21)	X45	E8	0	WT5_2dpi	428	393.8	0	0	6.08	6.08			1
M-CSF (21)	X46	F8	0	G1_WT1	288.5	254.3	0	0	3.97	3.97			1
M-CSF (21)	X47	G8	0	G1_WT2	300	265.8	0	0	4.14	4.14			1
M-CSF (21)	X48	H8	0	G1_WT3	287	252.8	0	0	3.95	3.95			1
M-CSF (21)	X49	A9	0	RH1_2dpi	292	257.8	0	0	4.02	4.02			1
M-CSF (21)	X50	B9	0	RH2_2dpi	315	280.8	0	0	4.37	4.37			1
M-CSF (21)	X51	C9	0	RH3_2dpi	232	197.8	0	0	3.11	3.11			1
M-CSF (21)	X52	D9	0	RH4_2dpi	329.5	295.3	0	0	4.59	4.59			1
M-CSF (21)	X53	E9	0	RH5_2dpi	273	238.8	0	0	3.73	3.73			1
M-CSF (21)	X54	F9	0	G1_Vip1	205	170.8	0	0	2.7	2.7			1
M-CSF (21)	X55	G9	0	G1_Vip2	228	193.8	0	0	3.05	3.05			1
M-CSF (21)	X56	H9	0	G1_Vip3	216	181.8	0	0	2.87	2.87			1
M-CSF (21)	X57	A10	0	RHEV1_2dpi	301	266.8	0	0	4.16	4.16			1
M-CSF (21)	X58	B10	0	RHEV2_2dpi	309.5	275.3	0	0	4.29	4.29			1
M-CSF (21)	X59	C10	0	RHEV3_2dpi	307	272.8	0	0	4.25	4.25			1
M-CSF (21)	X60	D10	0	RHEV4_2dpi	278.5	244.3	0	0	3.82	3.82			1
M-CSF (21)	X61	E10	0	RHEV5_2dpi	280	245.8	0	0	3.84	3.84			1
M-CSF (21)	X62	F10	0	G2_WT1	337	302.8	0	0	4.7	4.7			1
M-CSF (21)	X63	G10	0	G2_WT2	339	304.8	0	0	4.73	4.73			1
M-CSF (21)	X64	H10	0	G2_WT3	277.5	243.3	0	0	3.8	3.8			1
M-CSF (21)	X65	A11	0	EV1_2dpi	289.5	255.3	0	0	3.98	3.98			1
M-CSF (21)	X66	B11	0	EV2_2dpi	408.5	374.3	0	0	5.79	5.79			1
M-CSF (21)	X67	C11	0	EV3_2dpi	302	267.8	0	0	4.17	4.17			1
M-CSF (21)	X68	D11	0	EV4_2dpi	445	410.8	0	0	6.34	6.34			1
M-CSF (21)	X69	E11	0	EV5_2dpi	271	236.8	0	0	3.7	3.7			1
M-CSF (21)	X70	F11	0	G2_WT4	255	220.8	0	0	3.46	3.46			1
M-CSF (21)	X71	G11	0	G2_Vip1	402.5	368.3	0	0	5.7	5.7			1
M-CSF (21)	X72	H11	0	G2_Vip2	458.5	424.3	0	0	6.54	6.54			1
M-CSF (21)	X73	A12	0	WT1_6dpi	1094	1059.8	0	0	16.28	16.28			1
M-CSF (21)	X74	B12	0	WT2_6dpi	856	821.8	0	0	12.6	12.6			1
M-CSF (21)	X75	C12	0	WT3_6dpi	670	635.8	0	0	9.75	9.75			1
M-CSF (21)	X76	D12	0	WT4_6dpi	863	828.8	0	0	12.7	12.7			1
M-CSF (21)	X77	E12	0	WT5_6dpi	521	486.8	0	0	7.49	7.49			1
M-CSF (21)	X78	F12	0	G2_Vip3	432	397.8	0	0	6.14	6.14			1
M-CSF (21)	X79	G12	0	G2_Vip4	473	438.8	0	0	6.76	6.76			1
M-CSF (21)	X80	H12	0	G2_Vip5	434.5	400.3	0	0	6.18	6.18			1
Analyte	Type	Well	Outlier	Description	FI	FI - Bkgd	Std Dev	%CV	Conc in Range	Obs Conc	Exp Conc	(Obs/Exp) * 100	Dilution	Bead Count
M-CSF (21)	B	H1	0	Reagent Name: Background0	33.5	33.5							1	126
M-CSF (21)	B	H2	0	Reagent Name: Background0	35	35							1	57
M-CSF (21)	S1	G1	0	Reagent Name: Standard1	45	10.8			0.21	0.21	0.21	103	1	78
M-CSF (21)	S1	G2	0	Reagent Name: Standard1	42.5	8.3			OOR <	*0.17	0.21	84	1	92
M-CSF (21)	S2	F1	0	Reagent Name: Standard2	97	62.8			1.04	1.04	0.83	125	1	91
M-CSF (21)	S2	F2	0	Reagent Name: Standard2	75	40.8			0.7	0.7	0.83	84	1	101
M-CSF (21)	S3	E1	0	Reagent Name: Standard3	261	226.8			3.55	3.55	3.32	107	1	121
M-CSF (21)	S3	E2	0	Reagent Name: Standard3	249.5	215.3			3.38	3.38	3.32	102	1	94
M-CSF (21)	S4	D1	0	Reagent Name: Standard4	828	793.8			12.17	12.17	13.28	92	1	218
M-CSF (21)	S4	D2	0	Reagent Name: Standard4	818.5	784.3			12.02	12.02	13.28	91	1	124
M-CSF (21)	S5	C1	0	Reagent Name: Standard5	3822.5	3788.3			63.66	63.66	53.13	120	1	110
M-CSF (21)	S5	C2	0	Reagent Name: Standard5	3359	3324.8			54.79	54.79	53.13	103	1	82
M-CSF (21)	S6	B1	0	Reagent Name: Standard6	9301	9266.8			210.98	210.98	212.5	99	1	91
M-CSF (21)	S6	B2	0	Reagent Name: Standard6	8762.5	8728.3			191.68	191.68	212.5	90	1	136
M-CSF (21)	S7	A1	0	Reagent Name: Standard7	17019.5	16985.3			852.02	852.02	850	100	1	106
M-CSF (21)	S7	A2	0	Reagent Name: Standard7	17288	17253.8			OOR >	*904.37	850	106	1	113
M-CSF (21)	X1	A3	0	WT1_1dpi	431	396.8			6.13	6.13			1	64
M-CSF (21)	X2	B3	0	WT2_1dpi	324	289.8			4.51	4.51			1	85
M-CSF (21)	X3	C3	0	WT3_1dpi	225	190.8			3.01	3.01			1	52
M-CSF (21)	X4	D3	0	WT4_1dpi	321	286.8			4.46	4.46			1	43
M-CSF (21)	X5	E3	0	WT5_1dpi	315	280.8			4.37	4.37			1	75
M-CSF (21)	X6	F3	0	RH1_6dpi	379	344.8			5.34	5.34			1	99
M-CSF (21)	X7	G3	0	RHEV1_6dpi	360	325.8			5.05	5.05			1	21
M-CSF (21)	X8	H3	0	EV1_6dpi	589	554.8			8.52	8.52			1	61
M-CSF (21)	X9	A4	0	RH1_1dpi	415	380.8			5.88	5.88			1	81
M-CSF (21)	X10	B4	0	RH2_1dpi	418	383.8			5.93	5.93			1	57
M-CSF (21)	X11	C4	0	RH3_1dpi	341	306.8			4.76	4.76			1	90
M-CSF (21)	X12	D4	0	RH4_1dpi	371	336.8			5.22	5.22			1	71
M-CSF (21)	X13	E4	0	RH5_1dpi	242.5	208.3			3.27	3.27			1	100
M-CSF (21)	X14	F4	0	RH2_6dpi	260.5	226.3			3.55	3.55			1	130
M-CSF (21)	X15	G4	0	RHEV2_6dpi	361	326.8			5.07	5.07			1	55
M-CSF (21)	X16	H4	0	EV2_6dpi	674	639.8			9.81	9.81			1	15
M-CSF (21)	X17	A5	0	RHEV1_1dpi	335	300.8			4.67	4.67			1	28
M-CSF (21)	X18	B5	0	RHEV2_1dpi	319.5	285.3			4.44	4.44			1	64
M-CSF (21)	X19	C5	0	RHEV3_1dpi	342	307.8			4.78	4.78			1	59
M-CSF (21)	X20	D5	0	RHEV4_1dpi	268	233.8			3.66	3.66			1	98
M-CSF (21)	X21	E5	0	RHEV5_1dpi	241	206.8			3.25	3.25			1	53
M-CSF (21)	X22	F5	0	RH3_6dpi	240	205.8			3.23	3.23			1	55
M-CSF (21)	X23	G5	0	RHEV3_6dpi	329.5	295.3			4.59	4.59			1	52
M-CSF (21)	X24	H5	0	EV3_6dpi	435	400.8			6.19	6.19			1	19
M-CSF (21)	X25	A6	0	EV1_1dpi	343	308.8			4.79	4.79			1	61
M-CSF (21)	X26	B6	0	EV2_1dpi	297.5	263.3			4.11	4.11			1	60
M-CSF (21)	X27	C6	0	EV3_1dpi	349	314.8			4.89	4.89			1	67
M-CSF (21)	X28	D6	0	EV4_1dpi	233	198.8			3.13	3.13			1	98
M-CSF (21)	X29	E6	0	EV5_1dpi	169.5	135.3			2.16	2.16			1	82
M-CSF (21)	X30	F6	0	RH4_6dpi	336	301.8			4.69	4.69			1	65
M-CSF (21)	X31	G6	0	RHEV4_6dpi	374	339.8			5.26	5.26			1	61
M-CSF (21)	X32	H6	0	EV4_6dpi	792	757.8			11.61	11.61			1	8
M-CSF (21)	X33	A7	0	MK1	292	257.8			4.02	4.02			1	64
M-CSF (21)	X34	B7	0	MK2	190.5	156.3			2.48	2.48			1	84
M-CSF (21)	X35	C7	0	MK3	313.5	279.3			4.35	4.35			1	86
M-CSF (21)	X36	D7	0	MK4	193	158.8			2.52	2.52			1	79
M-CSF (21)	X37	E7	0	MK5	192	157.8			2.5	2.5			1	84
M-CSF (21)	X38	F7	0	RH5_6dpi	283.5	249.3			3.89	3.89			1	80
M-CSF (21)	X39	G7	0	RHEV5_6dpi	299.5	265.3			4.14	4.14			1	86
M-CSF (21)	X40	H7	0	EV5_6dpi	567	532.8			8.19	8.19			1	24
M-CSF (21)	X41	A8	0	WT1_2dpi	296.5	262.3			4.09	4.09			1	82
M-CSF (21)	X42	B8	0	WT2_2dpi	344	309.8			4.81	4.81			1	117
M-CSF (21)	X43	C8	0	WT3_2dpi	291.5	257.3			4.02	4.02			1	78
M-CSF (21)	X44	D8	0	WT4_2dpi	320	285.8			4.45	4.45			1	92
M-CSF (21)	X45	E8	0	WT5_2dpi	428	393.8			6.08	6.08			1	85
M-CSF (21)	X46	F8	0	G1_WT1	288.5	254.3			3.97	3.97			1	126
M-CSF (21)	X47	G8	0	G1_WT2	300	265.8			4.14	4.14			1	67
M-CSF (21)	X48	H8	0	G1_WT3	287	252.8			3.95	3.95			1	96
M-CSF (21)	X49	A9	0	RH1_2dpi	292	257.8			4.02	4.02			1	67
M-CSF (21)	X50	B9	0	RH2_2dpi	315	280.8			4.37	4.37			1	59
M-CSF (21)	X51	C9	0	RH3_2dpi	232	197.8			3.11	3.11			1	61
M-CSF (21)	X52	D9	0	RH4_2dpi	329.5	295.3			4.59	4.59			1	86
M-CSF (21)	X53	E9	0	RH5_2dpi	273	238.8			3.73	3.73			1	105
M-CSF (21)	X54	F9	0	G1_Vip1	205	170.8			2.7	2.7			1	91
M-CSF (21)	X55	G9	0	G1_Vip2	228	193.8			3.05	3.05			1	77
M-CSF (21)	X56	H9	0	G1_Vip3	216	181.8			2.87	2.87			1	91
M-CSF (21)	X57	A10	0	RHEV1_2dpi	301	266.8			4.16	4.16			1	93
M-CSF (21)	X58	B10	0	RHEV2_2dpi	309.5	275.3			4.29	4.29			1	94
M-CSF (21)	X59	C10	0	RHEV3_2dpi	307	272.8			4.25	4.25			1	94
M-CSF (21)	X60	D10	0	RHEV4_2dpi	278.5	244.3			3.82	3.82			1	84
M-CSF (21)	X61	E10	0	RHEV5_2dpi	280	245.8			3.84	3.84			1	83
M-CSF (21)	X62	F10	0	G2_WT1	337	302.8			4.7	4.7			1	71
M-CSF (21)	X63	G10	0	G2_WT2	339	304.8			4.73	4.73			1	72
M-CSF (21)	X64	H10	0	G2_WT3	277.5	243.3			3.8	3.8			1	98
M-CSF (21)	X65	A11	0	EV1_2dpi	289.5	255.3			3.98	3.98			1	78
M-CSF (21)	X66	B11	0	EV2_2dpi	408.5	374.3			5.79	5.79			1	74
M-CSF (21)	X67	C11	0	EV3_2dpi	302	267.8			4.17	4.17			1	88
M-CSF (21)	X68	D11	0	EV4_2dpi	445	410.8			6.34	6.34			1	63
M-CSF (21)	X69	E11	0	EV5_2dpi	271	236.8			3.7	3.7			1	94
M-CSF (21)	X70	F11	0	G2_WT4	255	220.8			3.46	3.46			1	99
M-CSF (21)	X71	G11	0	G2_Vip1	402.5	368.3			5.7	5.7			1	14
M-CSF (21)	X72	H11	0	G2_Vip2	458.5	424.3			6.54	6.54			1	70
M-CSF (21)	X73	A12	0	WT1_6dpi	1094	1059.8			16.28	16.28			1	21
M-CSF (21)	X74	B12	0	WT2_6dpi	856	821.8			12.6	12.6			1	34
M-CSF (21)	X75	C12	0	WT3_6dpi	670	635.8			9.75	9.75			1	31
M-CSF (21)	X76	D12	0	WT4_6dpi	863	828.8			12.7	12.7			1	44
M-CSF (21)	X77	E12	0	WT5_6dpi	521	486.8			7.49	7.49			1	13
M-CSF (21)	X78	F12	0	G2_Vip3	432	397.8			6.14	6.14			1	17
M-CSF (21)	X79	G12	0	G2_Vip4	473	438.8			6.76	6.76			1	45
M-CSF (21)	X80	H12	0	G2_Vip5	434.5	400.3			6.18	6.18			1	26
*** = Value not available; --- = Designated as an outlier
*Value = Value extrapolated beyond standard range
OOR = Out of Range; OOR> = Out of Range Above; OOR< = Out of Range Below
Exp Conc = Expected Concentration; Obs Conc = Observed Concentration
Conc in Range = Unknown sample concentrations within range where standards recovery is 80-120%
Conc In Range = 0.194 to 877.614 (equivalent to 9.5 to 17119.5 FI - Bkgd)
Regression Type: Logistic - 5PL
Std. Curve: FI = -1.88723 + (23091.2 + 1.88723) / ((1 + (Conc / 303.467)^-1.01416))^1.02071
FitProb. = 0.0256, ResVar. = 3.6638

## Sheet: IP-10 (22)
File Name: O:\SIgNLab\Immuno Monitoring\Luminex results\301-400\Lisa\2017-11-16 YiHao\YiHao_Procarta_36-plex_20171116_20171116_130300.rbx
Analyte: IP-10 (22)
Acquisition Date: 16-Nov-2017, 12:25 PM
Reader Serial Number: FM3DD10333001
Plate ID:
RP1 PMT (Volts): 520.97
RP1 Target: NA
Analyte	Type	Well	Outlier	Description	FI	FI - Bkgd	Std Dev	%CV	Conc in Range	Obs Conc	Exp Conc	(Obs/Exp) * 100	Dilution	Bead Count
IP-10 (22)	B	H1,H2	0	Reagent Name: Background0	32.5	32.5	0.71	2.18					1
IP-10 (22)	S1	G1,G2	0	Reagent Name: Standard1	56.5	24	3.54	6.26	0.41	0.41	0.43	96	1
IP-10 (22)	S2	F1,F2	0	Reagent Name: Standard2	121	88.5	2.83	2.34	1.75	1.75	1.71	102	1
IP-10 (22)	S3	E1,E2	0	Reagent Name: Standard3	398.8	366.3	33.59	8.42	7.17	7.17	6.84	105	1
IP-10 (22)	S4	D1,D2	0	Reagent Name: Standard4	1385	1352.5	38.18	2.76	25.45	25.45	27.34	93	1
IP-10 (22)	S5	C1,C2	0	Reagent Name: Standard5	6249.8	6217.3	749.18	11.99	114.75	114.75	109.38	105	1
IP-10 (22)	S6	B1,B2	0	Reagent Name: Standard6	16839	16806.5	1090.36	6.48	425.75	425.75	437.5	97	1
IP-10 (22)	S7	A1,A2	0	Reagent Name: Standard7	22485	22452.5	73.54	0.33	1960.39	1960.39	1750	112	1
IP-10 (22)	X1	A3	0	WT1_1dpi	13374	13341.5	0	0	284.4	284.4			1
IP-10 (22)	X2	B3	0	WT2_1dpi	10032	9999.5	0	0	194.31	194.31			1
IP-10 (22)	X3	C3	0	WT3_1dpi	10952	10919.5	0	0	216.57	216.57			1
IP-10 (22)	X4	D3	0	WT4_1dpi	12078	12045.5	0	0	246.15	246.15			1
IP-10 (22)	X5	E3	0	WT5_1dpi	13991	13958.5	0	0	304.65	304.65			1
IP-10 (22)	X6	F3	0	RH1_6dpi	21305.5	21273	0	0	982.58	982.58			1
IP-10 (22)	X7	G3	0	RHEV1_6dpi	22905	22872.5	0	0	OOR >	*10050.48			1
IP-10 (22)	X8	H3	0	EV1_6dpi	24954	24921.5	0	0	OOR >	OOR >			1
IP-10 (22)	X9	A4	0	RH1_1dpi	24470	24437.5	0	0	OOR >	OOR >			1
IP-10 (22)	X10	B4	0	RH2_1dpi	24573.5	24541	0	0	OOR >	OOR >			1
IP-10 (22)	X11	C4	0	RH3_1dpi	22847.5	22815	0	0	OOR >	*4788.73			1
IP-10 (22)	X12	D4	0	RH4_1dpi	25609.5	25577	0	0	OOR >	OOR >			1
IP-10 (22)	X13	E4	0	RH5_1dpi	14757	14724.5	0	0	332.11	332.11			1
IP-10 (22)	X14	F4	0	RH2_6dpi	21455	21422.5	0	0	1036.53	1036.53			1
IP-10 (22)	X15	G4	0	RHEV2_6dpi	23711	23678.5	0	0	OOR >	OOR >			1
IP-10 (22)	X16	H4	0	EV2_6dpi	24286	24253.5	0	0	OOR >	OOR >			1
IP-10 (22)	X17	A5	0	RHEV1_1dpi	22744	22711.5	0	0	OOR >	*3091.90			1
IP-10 (22)	X18	B5	0	RHEV2_1dpi	23020	22987.5	0	0	OOR >	OOR >			1
IP-10 (22)	X19	C5	0	RHEV3_1dpi	23054.5	23022	0	0	OOR >	OOR >			1
IP-10 (22)	X20	D5	0	RHEV4_1dpi	24723	24690.5	0	0	OOR >	OOR >			1
IP-10 (22)	X21	E5	0	RHEV5_1dpi	23872	23839.5	0	0	OOR >	OOR >			1
IP-10 (22)	X22	F5	0	RH3_6dpi	20119	20086.5	0	0	716.06	716.06			1
IP-10 (22)	X23	G5	0	RHEV3_6dpi	21639	21606.5	0	0	1115.02	1115.02			1
IP-10 (22)	X24	H5	0	EV3_6dpi	22939.5	22907	0	0	OOR >	OOR >			1
IP-10 (22)	X25	A6	0	EV1_1dpi	12104	12071.5	0	0	246.87	246.87			1
IP-10 (22)	X26	B6	0	EV2_1dpi	18980	18947.5	0	0	578.52	578.52			1
IP-10 (22)	X27	C6	0	EV3_1dpi	10341	10308.5	0	0	201.62	201.62			1
IP-10 (22)	X28	D6	0	EV4_1dpi	13910	13877.5	0	0	301.9	301.9			1
IP-10 (22)	X29	E6	0	EV5_1dpi	12720	12687.5	0	0	264.45	264.45			1
IP-10 (22)	X30	F6	0	RH4_6dpi	21166.5	21134	0	0	938.51	938.51			1
IP-10 (22)	X31	G6	0	RHEV4_6dpi	23181	23148.5	0	0	OOR >	OOR >			1
IP-10 (22)	X32	H6	0	EV4_6dpi	24171	24138.5	0	0	OOR >	OOR >			1
IP-10 (22)	X33	A7	0	MK1	914	881.5	0	0	16.82	16.82			1
IP-10 (22)	X34	B7	0	MK2	731	698.5	0	0	13.43	13.43			1
IP-10 (22)	X35	C7	0	MK3	917	884.5	0	0	16.88	16.88			1
IP-10 (22)	X36	D7	0	MK4	681.5	649	0	0	12.51	12.51			1
IP-10 (22)	X37	E7	0	MK5	574	541.5	0	0	10.49	10.49			1
IP-10 (22)	X38	F7	0	RH5_6dpi	21547	21514.5	0	0	1073.87	1073.87			1
IP-10 (22)	X39	G7	0	RHEV5_6dpi	22445	22412.5	0	0	1874.3	1874.3			1
IP-10 (22)	X40	H7	0	EV5_6dpi	22421	22388.5	0	0	1827.62	1827.62			1
IP-10 (22)	X41	A8	0	WT1_2dpi	25138	25105.5	0	0	OOR >	OOR >			1
IP-10 (22)	X42	B8	0	WT2_2dpi	24862	24829.5	0	0	OOR >	OOR >			1
IP-10 (22)	X43	C8	0	WT3_2dpi	24320.5	24288	0	0	OOR >	OOR >			1
IP-10 (22)	X44	D8	0	WT4_2dpi	24447	24414.5	0	0	OOR >	OOR >			1
IP-10 (22)	X45	E8	0	WT5_2dpi	24447	24414.5	0	0	OOR >	OOR >			1
IP-10 (22)	X46	F8	0	G1_WT1	24332	24299.5	0	0	OOR >	OOR >			1
IP-10 (22)	X47	G8	0	G1_WT2	24228.5	24196	0	0	OOR >	OOR >			1
IP-10 (22)	X48	H8	0	G1_WT3	23849	23816.5	0	0	OOR >	OOR >			1
IP-10 (22)	X49	A9	0	RH1_2dpi	22421	22388.5	0	0	1827.62	1827.62			1
IP-10 (22)	X50	B9	0	RH2_2dpi	23158	23125.5	0	0	OOR >	OOR >			1
IP-10 (22)	X51	C9	0	RH3_2dpi	22767	22734.5	0	0	OOR >	*3315.00			1
IP-10 (22)	X52	D9	0	RH4_2dpi	23365	23332.5	0	0	OOR >	OOR >			1
IP-10 (22)	X53	E9	0	RH5_2dpi	21938	21905.5	0	0	1285.35	1285.35			1
IP-10 (22)	X54	F9	0	G1_Vip1	23043	23010.5	0	0	OOR >	OOR >			1
IP-10 (22)	X55	G9	0	G1_Vip2	25529	25496.5	0	0	OOR >	OOR >			1
IP-10 (22)	X56	H9	0	G1_Vip3	23975.5	23943	0	0	OOR >	OOR >			1
IP-10 (22)	X57	A10	0	RHEV1_2dpi	22571.5	22539	0	0	OOR >	*2194.10			1
IP-10 (22)	X58	B10	0	RHEV2_2dpi	24090.5	24058	0	0	OOR >	OOR >			1
IP-10 (22)	X59	C10	0	RHEV3_2dpi	24412.5	24380	0	0	OOR >	OOR >			1
IP-10 (22)	X60	D10	0	RHEV4_2dpi	23619	23586.5	0	0	OOR >	OOR >			1
IP-10 (22)	X61	E10	0	RHEV5_2dpi	22386.5	22354	0	0	1766.03	1766.03			1
IP-10 (22)	X62	F10	0	G2_WT1	24010	23977.5	0	0	OOR >	OOR >			1
IP-10 (22)	X63	G10	0	G2_WT2	24378	24345.5	0	0	OOR >	OOR >			1
IP-10 (22)	X64	H10	0	G2_WT3	24908	24875.5	0	0	OOR >	OOR >			1
IP-10 (22)	X65	A11	0	EV1_2dpi	26093.5	26061	0	0	OOR >	OOR >			1
IP-10 (22)	X66	B11	0	EV2_2dpi	25506	25473.5	0	0	OOR >	OOR >			1
IP-10 (22)	X67	C11	0	EV3_2dpi	25967	25934.5	0	0	OOR >	OOR >			1
IP-10 (22)	X68	D11	0	EV4_2dpi	26059	26026.5	0	0	OOR >	OOR >			1
IP-10 (22)	X69	E11	0	EV5_2dpi	25000	24967.5	0	0	OOR >	OOR >			1
IP-10 (22)	X70	F11	0	G2_WT4	22859	22826.5	0	0	OOR >	*5208.53			1
IP-10 (22)	X71	G11	0	G2_Vip1	25391	25358.5	0	0	OOR >	OOR >			1
IP-10 (22)	X72	H11	0	G2_Vip2	24378	24345.5	0	0	OOR >	OOR >			1
IP-10 (22)	X73	A12	0	WT1_6dpi	22053	22020.5	0	0	1372.63	1372.63			1
IP-10 (22)	X74	B12	0	WT2_6dpi	22514	22481.5	0	0	OOR >	*2030.48			1
IP-10 (22)	X75	C12	0	WT3_6dpi	22583	22550.5	0	0	OOR >	*2231.68			1
IP-10 (22)	X76	D12	0	WT4_6dpi	22479	22446.5	0	0	1946.75	1946.75			1
IP-10 (22)	X77	E12	0	WT5_6dpi	21363	21330.5	0	0	1002.44	1002.44			1
IP-10 (22)	X78	F12	0	G2_Vip3	22721	22688.5	0	0	OOR >	*2908.14			1
IP-10 (22)	X79	G12	0	G2_Vip4	24942.5	24910	0	0	OOR >	OOR >			1
IP-10 (22)	X80	H12	0	G2_Vip5	23135	23102.5	0	0	OOR >	OOR >			1
Analyte	Type	Well	Outlier	Description	FI	FI - Bkgd	Std Dev	%CV	Conc in Range	Obs Conc	Exp Conc	(Obs/Exp) * 100	Dilution	Bead Count
IP-10 (22)	B	H1	0	Reagent Name: Background0	33	33							1	101
IP-10 (22)	B	H2	0	Reagent Name: Background0	32	32							1	81
IP-10 (22)	S1	G1	0	Reagent Name: Standard1	59	26.5			0.46	0.46	0.43	109	1	88
IP-10 (22)	S1	G2	0	Reagent Name: Standard1	54	21.5			OOR <	*0.36	0.43	84	1	59
IP-10 (22)	S2	F1	0	Reagent Name: Standard2	123	90.5			1.79	1.79	1.71	105	1	85
IP-10 (22)	S2	F2	0	Reagent Name: Standard2	119	86.5			1.71	1.71	1.71	100	1	91
IP-10 (22)	S3	E1	0	Reagent Name: Standard3	375	342.5			6.72	6.72	6.84	98	1	111
IP-10 (22)	S3	E2	0	Reagent Name: Standard3	422.5	390			7.63	7.63	6.84	112	1	96
IP-10 (22)	S4	D1	0	Reagent Name: Standard4	1412	1379.5			25.94	25.94	27.34	95	1	168
IP-10 (22)	S4	D2	0	Reagent Name: Standard4	1358	1325.5			24.95	24.95	27.34	91	1	124
IP-10 (22)	S5	C1	0	Reagent Name: Standard5	6779.5	6747			125.06	125.06	109.38	114	1	100
IP-10 (22)	S5	C2	0	Reagent Name: Standard5	5720	5687.5			104.62	104.62	109.38	96	1	74
IP-10 (22)	S6	B1	0	Reagent Name: Standard6	17610	17577.5			471.27	471.27	437.5	108	1	60
IP-10 (22)	S6	B2	0	Reagent Name: Standard6	16068	16035.5			387.03	387.03	437.5	88	1	120
IP-10 (22)	S7	A1	0	Reagent Name: Standard7	22433	22400.5			1850.54	1850.54	1750	106	1	80
IP-10 (22)	S7	A2	0	Reagent Name: Standard7	22537	22504.5			OOR >	*2091.56	1750	120	1	91
IP-10 (22)	X1	A3	0	WT1_1dpi	13374	13341.5			284.4	284.4			1	105
IP-10 (22)	X2	B3	0	WT2_1dpi	10032	9999.5			194.31	194.31			1	239
IP-10 (22)	X3	C3	0	WT3_1dpi	10952	10919.5			216.57	216.57			1	157
IP-10 (22)	X4	D3	0	WT4_1dpi	12078	12045.5			246.15	246.15			1	113
IP-10 (22)	X5	E3	0	WT5_1dpi	13991	13958.5			304.65	304.65			1	142
IP-10 (22)	X6	F3	0	RH1_6dpi	21305.5	21273			982.58	982.58			1	122
IP-10 (22)	X7	G3	0	RHEV1_6dpi	22905	22872.5			OOR >	*10050.48			1	103
IP-10 (22)	X8	H3	0	EV1_6dpi	24954	24921.5			OOR >	OOR >			1	333
IP-10 (22)	X9	A4	0	RH1_1dpi	24470	24437.5			OOR >	OOR >			1	187
IP-10 (22)	X10	B4	0	RH2_1dpi	24573.5	24541			OOR >	OOR >			1	154
IP-10 (22)	X11	C4	0	RH3_1dpi	22847.5	22815			OOR >	*4788.73			1	160
IP-10 (22)	X12	D4	0	RH4_1dpi	25609.5	25577			OOR >	OOR >			1	140
IP-10 (22)	X13	E4	0	RH5_1dpi	14757	14724.5			332.11	332.11			1	208
IP-10 (22)	X14	F4	0	RH2_6dpi	21455	21422.5			1036.53	1036.53			1	181
IP-10 (22)	X15	G4	0	RHEV2_6dpi	23711	23678.5			OOR >	OOR >			1	132
IP-10 (22)	X16	H4	0	EV2_6dpi	24286	24253.5			OOR >	OOR >			1	139
IP-10 (22)	X17	A5	0	RHEV1_1dpi	22744	22711.5			OOR >	*3091.90			1	104
IP-10 (22)	X18	B5	0	RHEV2_1dpi	23020	22987.5			OOR >	OOR >			1	123
IP-10 (22)	X19	C5	0	RHEV3_1dpi	23054.5	23022			OOR >	OOR >			1	114
IP-10 (22)	X20	D5	0	RHEV4_1dpi	24723	24690.5			OOR >	OOR >			1	175
IP-10 (22)	X21	E5	0	RHEV5_1dpi	23872	23839.5			OOR >	OOR >			1	239
IP-10 (22)	X22	F5	0	RH3_6dpi	20119	20086.5			716.06	716.06			1	91
IP-10 (22)	X23	G5	0	RHEV3_6dpi	21639	21606.5			1115.02	1115.02			1	122
IP-10 (22)	X24	H5	0	EV3_6dpi	22939.5	22907			OOR >	OOR >			1	130
IP-10 (22)	X25	A6	0	EV1_1dpi	12104	12071.5			246.87	246.87			1	125
IP-10 (22)	X26	B6	0	EV2_1dpi	18980	18947.5			578.52	578.52			1	118
IP-10 (22)	X27	C6	0	EV3_1dpi	10341	10308.5			201.62	201.62			1	192
IP-10 (22)	X28	D6	0	EV4_1dpi	13910	13877.5			301.9	301.9			1	115
IP-10 (22)	X29	E6	0	EV5_1dpi	12720	12687.5			264.45	264.45			1	203
IP-10 (22)	X30	F6	0	RH4_6dpi	21166.5	21134			938.51	938.51			1	128
IP-10 (22)	X31	G6	0	RHEV4_6dpi	23181	23148.5			OOR >	OOR >			1	220
IP-10 (22)	X32	H6	0	EV4_6dpi	24171	24138.5			OOR >	OOR >			1	115
IP-10 (22)	X33	A7	0	MK1	914	881.5			16.82	16.82			1	102
IP-10 (22)	X34	B7	0	MK2	731	698.5			13.43	13.43			1	137
IP-10 (22)	X35	C7	0	MK3	917	884.5			16.88	16.88			1	177
IP-10 (22)	X36	D7	0	MK4	681.5	649			12.51	12.51			1	112
IP-10 (22)	X37	E7	0	MK5	574	541.5			10.49	10.49			1	159
IP-10 (22)	X38	F7	0	RH5_6dpi	21547	21514.5			1073.87	1073.87			1	171
IP-10 (22)	X39	G7	0	RHEV5_6dpi	22445	22412.5			1874.3	1874.3			1	117
IP-10 (22)	X40	H7	0	EV5_6dpi	22421	22388.5			1827.62	1827.62			1	159
IP-10 (22)	X41	A8	0	WT1_2dpi	25138	25105.5			OOR >	OOR >			1	155
IP-10 (22)	X42	B8	0	WT2_2dpi	24862	24829.5			OOR >	OOR >			1	142
IP-10 (22)	X43	C8	0	WT3_2dpi	24320.5	24288			OOR >	OOR >			1	198
IP-10 (22)	X44	D8	0	WT4_2dpi	24447	24414.5			OOR >	OOR >			1	209
IP-10 (22)	X45	E8	0	WT5_2dpi	24447	24414.5			OOR >	OOR >			1	143
IP-10 (22)	X46	F8	0	G1_WT1	24332	24299.5			OOR >	OOR >			1	155
IP-10 (22)	X47	G8	0	G1_WT2	24228.5	24196			OOR >	OOR >			1	134
IP-10 (22)	X48	H8	0	G1_WT3	23849	23816.5			OOR >	OOR >			1	161
IP-10 (22)	X49	A9	0	RH1_2dpi	22421	22388.5			1827.62	1827.62			1	160
IP-10 (22)	X50	B9	0	RH2_2dpi	23158	23125.5			OOR >	OOR >			1	310
IP-10 (22)	X51	C9	0	RH3_2dpi	22767	22734.5			OOR >	*3315.00			1	158
IP-10 (22)	X52	D9	0	RH4_2dpi	23365	23332.5			OOR >	OOR >			1	127
IP-10 (22)	X53	E9	0	RH5_2dpi	21938	21905.5			1285.35	1285.35			1	192
IP-10 (22)	X54	F9	0	G1_Vip1	23043	23010.5			OOR >	OOR >			1	107
IP-10 (22)	X55	G9	0	G1_Vip2	25529	25496.5			OOR >	OOR >			1	121
IP-10 (22)	X56	H9	0	G1_Vip3	23975.5	23943			OOR >	OOR >			1	92
IP-10 (22)	X57	A10	0	RHEV1_2dpi	22571.5	22539			OOR >	*2194.10			1	154
IP-10 (22)	X58	B10	0	RHEV2_2dpi	24090.5	24058			OOR >	OOR >			1	152
IP-10 (22)	X59	C10	0	RHEV3_2dpi	24412.5	24380			OOR >	OOR >			1	234
IP-10 (22)	X60	D10	0	RHEV4_2dpi	23619	23586.5			OOR >	OOR >			1	90
IP-10 (22)	X61	E10	0	RHEV5_2dpi	22386.5	22354			1766.03	1766.03			1	172
IP-10 (22)	X62	F10	0	G2_WT1	24010	23977.5			OOR >	OOR >			1	155
IP-10 (22)	X63	G10	0	G2_WT2	24378	24345.5			OOR >	OOR >			1	164
IP-10 (22)	X64	H10	0	G2_WT3	24908	24875.5			OOR >	OOR >			1	159
IP-10 (22)	X65	A11	0	EV1_2dpi	26093.5	26061			OOR >	OOR >			1	108
IP-10 (22)	X66	B11	0	EV2_2dpi	25506	25473.5			OOR >	OOR >			1	151
IP-10 (22)	X67	C11	0	EV3_2dpi	25967	25934.5			OOR >	OOR >			1	133
IP-10 (22)	X68	D11	0	EV4_2dpi	26059	26026.5			OOR >	OOR >			1	122
IP-10 (22)	X69	E11	0	EV5_2dpi	25000	24967.5			OOR >	OOR >			1	105
IP-10 (22)	X70	F11	0	G2_WT4	22859	22826.5			OOR >	*5208.53			1	173
IP-10 (22)	X71	G11	0	G2_Vip1	25391	25358.5			OOR >	OOR >			1	118
IP-10 (22)	X72	H11	0	G2_Vip2	24378	24345.5			OOR >	OOR >			1	141
IP-10 (22)	X73	A12	0	WT1_6dpi	22053	22020.5			1372.63	1372.63			1	103
IP-10 (22)	X74	B12	0	WT2_6dpi	22514	22481.5			OOR >	*2030.48			1	101
IP-10 (22)	X75	C12	0	WT3_6dpi	22583	22550.5			OOR >	*2231.68			1	117
IP-10 (22)	X76	D12	0	WT4_6dpi	22479	22446.5			1946.75	1946.75			1	124
IP-10 (22)	X77	E12	0	WT5_6dpi	21363	21330.5			1002.44	1002.44			1	71
IP-10 (22)	X78	F12	0	G2_Vip3	22721	22688.5			OOR >	*2908.14			1	131
IP-10 (22)	X79	G12	0	G2_Vip4	24942.5	24910			OOR >	OOR >			1	226
IP-10 (22)	X80	H12	0	G2_Vip5	23135	23102.5			OOR >	OOR >			1	249
*** = Value not available; --- = Designated as an outlier
*Value = Value extrapolated beyond standard range
OOR = Out of Range; OOR> = Out of Range Above; OOR< = Out of Range Below
Exp Conc = Expected Concentration; Obs Conc = Observed Concentration
Conc in Range = Unknown sample concentrations within range where standards recovery is 80-120%
Conc In Range = 0.411 to 1960.390 (equivalent to 24.0 to 22452.5 FI - Bkgd)
Regression Type: Logistic - 5PL
Std. Curve: FI = 5.70877 + (22889.3 - 5.70877) / ((1 + (Conc / 384.321)^-2.00945))^0.518831
FitProb. = 0.1782, ResVar. = 1.7247

## Sheet: IL-4 (26)
File Name: O:\SIgNLab\Immuno Monitoring\Luminex results\301-400\Lisa\2017-11-16 YiHao\YiHao_Procarta_36-plex_20171116_20171116_130300.rbx
Analyte: IL-4 (26)
Acquisition Date: 16-Nov-2017, 12:25 PM
Reader Serial Number: FM3DD10333001
Plate ID:
RP1 PMT (Volts): 520.97
RP1 Target: NA
Analyte	Type	Well	Outlier	Description	FI	FI - Bkgd	Std Dev	%CV	Conc in Range	Obs Conc	Exp Conc	(Obs/Exp) * 100	Dilution	Bead Count
IL-4 (26)	B	H1,H2	0	Reagent Name: Background0	12.3	12.3	1.06	8.66					1
IL-4 (26)	S1	G1,G2	0	Reagent Name: Standard1	31.8	19.5	3.89	12.25	1.31	1.31	1.31	100	1
IL-4 (26)	S2	F1,F2	0	Reagent Name: Standard2	88.5	76.3	2.12	2.4	5.19	5.19	5.22	99	1
IL-4 (26)	S3	E1,E2	0	Reagent Name: Standard3	322	309.8	21.92	6.81	21.56	21.56	20.9	103	1
IL-4 (26)	S4	D1,D2	0	Reagent Name: Standard4	1102	1089.8	9.9	0.9	79.69	79.69	83.59	95	1
IL-4 (26)	S5	C1,C2	0	Reagent Name: Standard5	4125.5	4113.3	243.95	5.91	350.28	350.28	334.38	105	1
IL-4 (26)	S6	B1,B2	0	Reagent Name: Standard6	11117.5	11105.3	632.86	5.69	1306.69	1306.69	1337.5	98	1
IL-4 (26)	S7	A1,A2	0	Reagent Name: Standard7	23423	23410.8	472.35	2.02	5393.32	5393.32	5350	101	1
IL-4 (26)	X1	A3	0	WT1_1dpi	30	17.8	0	0	OOR <	*1.19			1
IL-4 (26)	X2	B3	0	WT2_1dpi	23	10.8	0	0	OOR <	*0.71			1
IL-4 (26)	X3	C3	0	WT3_1dpi	27	14.8	0	0	OOR <	*0.98			1
IL-4 (26)	X4	D3	0	WT4_1dpi	23	10.8	0	0	OOR <	*0.71			1
IL-4 (26)	X5	E3	0	WT5_1dpi	26	13.8	0	0	OOR <	*0.91			1
IL-4 (26)	X6	F3	0	RH1_6dpi	63	50.8	0	0	3.44	3.44			1
IL-4 (26)	X7	G3	0	RHEV1_6dpi	60	47.8	0	0	3.24	3.24			1
IL-4 (26)	X8	H3	0	EV1_6dpi	61	48.8	0	0	3.3	3.3			1
IL-4 (26)	X9	A4	0	RH1_1dpi	39	26.8	0	0	1.8	1.8			1
IL-4 (26)	X10	B4	0	RH2_1dpi	46.5	34.3	0	0	2.31	2.31			1
IL-4 (26)	X11	C4	0	RH3_1dpi	35	22.8	0	0	1.53	1.53			1
IL-4 (26)	X12	D4	0	RH4_1dpi	116	103.8	0	0	7.09	7.09			1
IL-4 (26)	X13	E4	0	RH5_1dpi	27	14.8	0	0	OOR <	*0.98			1
IL-4 (26)	X14	F4	0	RH2_6dpi	82	69.8	0	0	4.75	4.75			1
IL-4 (26)	X15	G4	0	RHEV2_6dpi	87	74.8	0	0	5.09	5.09			1
IL-4 (26)	X16	H4	0	EV2_6dpi	129.5	117.3	0	0	8.03	8.03			1
IL-4 (26)	X17	A5	0	RHEV1_1dpi	43	30.8	0	0	2.07	2.07			1
IL-4 (26)	X18	B5	0	RHEV2_1dpi	54	41.8	0	0	2.83	2.83			1
IL-4 (26)	X19	C5	0	RHEV3_1dpi	72	59.8	0	0	4.06	4.06			1
IL-4 (26)	X20	D5	0	RHEV4_1dpi	56	43.8	0	0	2.96	2.96			1
IL-4 (26)	X21	E5	0	RHEV5_1dpi	51	38.8	0	0	2.62	2.62			1
IL-4 (26)	X22	F5	0	RH3_6dpi	56	43.8	0	0	2.96	2.96			1
IL-4 (26)	X23	G5	0	RHEV3_6dpi	55	42.8	0	0	2.89	2.89			1
IL-4 (26)	X24	H5	0	EV3_6dpi	59	46.8	0	0	3.17	3.17			1
IL-4 (26)	X25	A6	0	EV1_1dpi	27	14.8	0	0	OOR <	*0.98			1
IL-4 (26)	X26	B6	0	EV2_1dpi	29	16.8	0	0	OOR <	*1.12			1
IL-4 (26)	X27	C6	0	EV3_1dpi	25	12.8	0	0	OOR <	*0.85			1
IL-4 (26)	X28	D6	0	EV4_1dpi	24	11.8	0	0	OOR <	*0.78			1
IL-4 (26)	X29	E6	0	EV5_1dpi	24	11.8	0	0	OOR <	*0.78			1
IL-4 (26)	X30	F6	0	RH4_6dpi	81	68.8	0	0	4.68	4.68			1
IL-4 (26)	X31	G6	0	RHEV4_6dpi	55.5	43.3	0	0	2.93	2.93			1
IL-4 (26)	X32	H6	0	EV4_6dpi	67	54.8	0	0	3.72	3.72			1
IL-4 (26)	X33	A7	0	MK1	25	12.8	0	0	OOR <	*0.85			1
IL-4 (26)	X34	B7	0	MK2	24	11.8	0	0	OOR <	*0.78			1
IL-4 (26)	X35	C7	0	MK3	24	11.8	0	0	OOR <	*0.78			1
IL-4 (26)	X36	D7	0	MK4	19	6.8	0	0	OOR <	*0.44			1
IL-4 (26)	X37	E7	0	MK5	19	6.8	0	0	OOR <	*0.44			1
IL-4 (26)	X38	F7	0	RH5_6dpi	59	46.8	0	0	3.17	3.17			1
IL-4 (26)	X39	G7	0	RHEV5_6dpi	108	95.8	0	0	6.54	6.54			1
IL-4 (26)	X40	H7	0	EV5_6dpi	51	38.8	0	0	2.62	2.62			1
IL-4 (26)	X41	A8	0	WT1_2dpi	1014	1001.8	0	0	72.89	72.89			1
IL-4 (26)	X42	B8	0	WT2_2dpi	691	678.8	0	0	48.43	48.43			1
IL-4 (26)	X43	C8	0	WT3_2dpi	379.5	367.3	0	0	25.67	25.67			1
IL-4 (26)	X44	D8	0	WT4_2dpi	672	659.8	0	0	47.02	47.02			1
IL-4 (26)	X45	E8	0	WT5_2dpi	527	514.8	0	0	36.34	36.34			1
IL-4 (26)	X46	F8	0	G1_WT1	62	49.8	0	0	3.37	3.37			1
IL-4 (26)	X47	G8	0	G1_WT2	64.5	52.3	0	0	3.54	3.54			1
IL-4 (26)	X48	H8	0	G1_WT3	50	37.8	0	0	2.55	2.55			1
IL-4 (26)	X49	A9	0	RH1_2dpi	69	56.8	0	0	3.85	3.85			1
IL-4 (26)	X50	B9	0	RH2_2dpi	103	90.8	0	0	6.19	6.19			1
IL-4 (26)	X51	C9	0	RH3_2dpi	71.5	59.3	0	0	4.02	4.02			1
IL-4 (26)	X52	D9	0	RH4_2dpi	69	56.8	0	0	3.85	3.85			1
IL-4 (26)	X53	E9	0	RH5_2dpi	72	59.8	0	0	4.06	4.06			1
IL-4 (26)	X54	F9	0	G1_Vip1	42.5	30.3	0	0	2.04	2.04			1
IL-4 (26)	X55	G9	0	G1_Vip2	37	24.8	0	0	1.66	1.66			1
IL-4 (26)	X56	H9	0	G1_Vip3	43	30.8	0	0	2.07	2.07			1
IL-4 (26)	X57	A10	0	RHEV1_2dpi	105	92.8	0	0	6.33	6.33			1
IL-4 (26)	X58	B10	0	RHEV2_2dpi	179	166.8	0	0	11.47	11.47			1
IL-4 (26)	X59	C10	0	RHEV3_2dpi	88	75.8	0	0	5.16	5.16			1
IL-4 (26)	X60	D10	0	RHEV4_2dpi	98	85.8	0	0	5.85	5.85			1
IL-4 (26)	X61	E10	0	RHEV5_2dpi	105	92.8	0	0	6.33	6.33			1
IL-4 (26)	X62	F10	0	G2_WT1	99	86.8	0	0	5.92	5.92			1
IL-4 (26)	X63	G10	0	G2_WT2	56	43.8	0	0	2.96	2.96			1
IL-4 (26)	X64	H10	0	G2_WT3	44	31.8	0	0	2.14	2.14			1
IL-4 (26)	X65	A11	0	EV1_2dpi	914	901.8	0	0	65.23	65.23			1
IL-4 (26)	X66	B11	0	EV2_2dpi	908	895.8	0	0	64.77	64.77			1
IL-4 (26)	X67	C11	0	EV3_2dpi	2215	2202.8	0	0	170.97	170.97			1
IL-4 (26)	X68	D11	0	EV4_2dpi	640.5	628.3	0	0	44.69	44.69			1
IL-4 (26)	X69	E11	0	EV5_2dpi	504	491.8	0	0	34.66	34.66			1
IL-4 (26)	X70	F11	0	G2_WT4	43	30.8	0	0	2.07	2.07			1
IL-4 (26)	X71	G11	0	G2_Vip1	59	46.8	0	0	3.17	3.17			1
IL-4 (26)	X72	H11	0	G2_Vip2	52.5	40.3	0	0	2.72	2.72			1
IL-4 (26)	X73	A12	0	WT1_6dpi	141.5	129.3	0	0	8.86	8.86			1
IL-4 (26)	X74	B12	0	WT2_6dpi	93	80.8	0	0	5.5	5.5			1
IL-4 (26)	X75	C12	0	WT3_6dpi	74	61.8	0	0	4.2	4.2			1
IL-4 (26)	X76	D12	0	WT4_6dpi	58	45.8	0	0	3.1	3.1			1
IL-4 (26)	X77	E12	0	WT5_6dpi	64	51.8	0	0	3.51	3.51			1
IL-4 (26)	X78	F12	0	G2_Vip3	66	53.8	0	0	3.65	3.65			1
IL-4 (26)	X79	G12	0	G2_Vip4	56	43.8	0	0	2.96	2.96			1
IL-4 (26)	X80	H12	0	G2_Vip5	55.5	43.3	0	0	2.93	2.93			1
Analyte	Type	Well	Outlier	Description	FI	FI - Bkgd	Std Dev	%CV	Conc in Range	Obs Conc	Exp Conc	(Obs/Exp) * 100	Dilution	Bead Count
IL-4 (26)	B	H1	0	Reagent Name: Background0	11.5	11.5							1	126
IL-4 (26)	B	H2	0	Reagent Name: Background0	13	13							1	96
IL-4 (26)	S1	G1	0	Reagent Name: Standard1	34.5	22.3			1.49	1.49	1.31	114	1	86
IL-4 (26)	S1	G2	0	Reagent Name: Standard1	29	16.8			OOR <	*1.12	1.31	86	1	93
IL-4 (26)	S2	F1	0	Reagent Name: Standard2	87	74.8			5.09	5.09	5.22	97	1	124
IL-4 (26)	S2	F2	0	Reagent Name: Standard2	90	77.8			5.3	5.3	5.22	101	1	127
IL-4 (26)	S3	E1	0	Reagent Name: Standard3	337.5	325.3			22.66	22.66	20.9	108	1	152
IL-4 (26)	S3	E2	0	Reagent Name: Standard3	306.5	294.3			20.45	20.45	20.9	98	1	128
IL-4 (26)	S4	D1	0	Reagent Name: Standard4	1095	1082.8			79.15	79.15	83.59	95	1	205
IL-4 (26)	S4	D2	0	Reagent Name: Standard4	1109	1096.8			80.24	80.24	83.59	96	1	146
IL-4 (26)	S5	C1	0	Reagent Name: Standard5	4298	4285.8			367.94	367.94	334.38	110	1	105
IL-4 (26)	S5	C2	0	Reagent Name: Standard5	3953	3940.8			332.88	332.88	334.38	100	1	101
IL-4 (26)	S6	B1	0	Reagent Name: Standard6	11565	11552.8			1388.52	1388.52	1337.5	104	1	72
IL-4 (26)	S6	B2	0	Reagent Name: Standard6	10670	10657.8			1227.85	1227.85	1337.5	92	1	144
IL-4 (26)	S7	A1	0	Reagent Name: Standard7	23089	23076.8			5201.79	5201.79	5350	97	1	129
IL-4 (26)	S7	A2	0	Reagent Name: Standard7	23757	23744.8			OOR >	*5592.37	5350	105	1	104
IL-4 (26)	X1	A3	0	WT1_1dpi	30	17.8			OOR <	*1.19			1	113
IL-4 (26)	X2	B3	0	WT2_1dpi	23	10.8			OOR <	*0.71			1	306
IL-4 (26)	X3	C3	0	WT3_1dpi	27	14.8			OOR <	*0.98			1	201
IL-4 (26)	X4	D3	0	WT4_1dpi	23	10.8			OOR <	*0.71			1	119
IL-4 (26)	X5	E3	0	WT5_1dpi	26	13.8			OOR <	*0.91			1	189
IL-4 (26)	X6	F3	0	RH1_6dpi	63	50.8			3.44	3.44			1	163
IL-4 (26)	X7	G3	0	RHEV1_6dpi	60	47.8			3.24	3.24			1	143
IL-4 (26)	X8	H3	0	EV1_6dpi	61	48.8			3.3	3.3			1	375
IL-4 (26)	X9	A4	0	RH1_1dpi	39	26.8			1.8	1.8			1	211
IL-4 (26)	X10	B4	0	RH2_1dpi	46.5	34.3			2.31	2.31			1	176
IL-4 (26)	X11	C4	0	RH3_1dpi	35	22.8			1.53	1.53			1	225
IL-4 (26)	X12	D4	0	RH4_1dpi	116	103.8			7.09	7.09			1	155
IL-4 (26)	X13	E4	0	RH5_1dpi	27	14.8			OOR <	*0.98			1	221
IL-4 (26)	X14	F4	0	RH2_6dpi	82	69.8			4.75	4.75			1	211
IL-4 (26)	X15	G4	0	RHEV2_6dpi	87	74.8			5.09	5.09			1	171
IL-4 (26)	X16	H4	0	EV2_6dpi	129.5	117.3			8.03	8.03			1	180
IL-4 (26)	X17	A5	0	RHEV1_1dpi	43	30.8			2.07	2.07			1	137
IL-4 (26)	X18	B5	0	RHEV2_1dpi	54	41.8			2.83	2.83			1	183
IL-4 (26)	X19	C5	0	RHEV3_1dpi	72	59.8			4.06	4.06			1	161
IL-4 (26)	X20	D5	0	RHEV4_1dpi	56	43.8			2.96	2.96			1	209
IL-4 (26)	X21	E5	0	RHEV5_1dpi	51	38.8			2.62	2.62			1	309
IL-4 (26)	X22	F5	0	RH3_6dpi	56	43.8			2.96	2.96			1	129
IL-4 (26)	X23	G5	0	RHEV3_6dpi	55	42.8			2.89	2.89			1	149
IL-4 (26)	X24	H5	0	EV3_6dpi	59	46.8			3.17	3.17			1	173
IL-4 (26)	X25	A6	0	EV1_1dpi	27	14.8			OOR <	*0.98			1	214
IL-4 (26)	X26	B6	0	EV2_1dpi	29	16.8			OOR <	*1.12			1	167
IL-4 (26)	X27	C6	0	EV3_1dpi	25	12.8			OOR <	*0.85			1	230
IL-4 (26)	X28	D6	0	EV4_1dpi	24	11.8			OOR <	*0.78			1	147
IL-4 (26)	X29	E6	0	EV5_1dpi	24	11.8			OOR <	*0.78			1	298
IL-4 (26)	X30	F6	0	RH4_6dpi	81	68.8			4.68	4.68			1	150
IL-4 (26)	X31	G6	0	RHEV4_6dpi	55.5	43.3			2.93	2.93			1	232
IL-4 (26)	X32	H6	0	EV4_6dpi	67	54.8			3.72	3.72			1	188
IL-4 (26)	X33	A7	0	MK1	25	12.8			OOR <	*0.85			1	153
IL-4 (26)	X34	B7	0	MK2	24	11.8			OOR <	*0.78			1	159
IL-4 (26)	X35	C7	0	MK3	24	11.8			OOR <	*0.78			1	229
IL-4 (26)	X36	D7	0	MK4	19	6.8			OOR <	*0.44			1	164
IL-4 (26)	X37	E7	0	MK5	19	6.8			OOR <	*0.44			1	204
IL-4 (26)	X38	F7	0	RH5_6dpi	59	46.8			3.17	3.17			1	177
IL-4 (26)	X39	G7	0	RHEV5_6dpi	108	95.8			6.54	6.54			1	128
IL-4 (26)	X40	H7	0	EV5_6dpi	51	38.8			2.62	2.62			1	180
IL-4 (26)	X41	A8	0	WT1_2dpi	1014	1001.8			72.89	72.89			1	204
IL-4 (26)	X42	B8	0	WT2_2dpi	691	678.8			48.43	48.43			1	183
IL-4 (26)	X43	C8	0	WT3_2dpi	379.5	367.3			25.67	25.67			1	278
IL-4 (26)	X44	D8	0	WT4_2dpi	672	659.8			47.02	47.02			1	264
IL-4 (26)	X45	E8	0	WT5_2dpi	527	514.8			36.34	36.34			1	171
IL-4 (26)	X46	F8	0	G1_WT1	62	49.8			3.37	3.37			1	208
IL-4 (26)	X47	G8	0	G1_WT2	64.5	52.3			3.54	3.54			1	152
IL-4 (26)	X48	H8	0	G1_WT3	50	37.8			2.55	2.55			1	207
IL-4 (26)	X49	A9	0	RH1_2dpi	69	56.8			3.85	3.85			1	205
IL-4 (26)	X50	B9	0	RH2_2dpi	103	90.8			6.19	6.19			1	397
IL-4 (26)	X51	C9	0	RH3_2dpi	71.5	59.3			4.02	4.02			1	198
IL-4 (26)	X52	D9	0	RH4_2dpi	69	56.8			3.85	3.85			1	146
IL-4 (26)	X53	E9	0	RH5_2dpi	72	59.8			4.06	4.06			1	297
IL-4 (26)	X54	F9	0	G1_Vip1	42.5	30.3			2.04	2.04			1	132
IL-4 (26)	X55	G9	0	G1_Vip2	37	24.8			1.66	1.66			1	154
IL-4 (26)	X56	H9	0	G1_Vip3	43	30.8			2.07	2.07			1	138
IL-4 (26)	X57	A10	0	RHEV1_2dpi	105	92.8			6.33	6.33			1	210
IL-4 (26)	X58	B10	0	RHEV2_2dpi	179	166.8			11.47	11.47			1	235
IL-4 (26)	X59	C10	0	RHEV3_2dpi	88	75.8			5.16	5.16			1	286
IL-4 (26)	X60	D10	0	RHEV4_2dpi	98	85.8			5.85	5.85			1	107
IL-4 (26)	X61	E10	0	RHEV5_2dpi	105	92.8			6.33	6.33			1	207
IL-4 (26)	X62	F10	0	G2_WT1	99	86.8			5.92	5.92			1	237
IL-4 (26)	X63	G10	0	G2_WT2	56	43.8			2.96	2.96			1	201
IL-4 (26)	X64	H10	0	G2_WT3	44	31.8			2.14	2.14			1	185
IL-4 (26)	X65	A11	0	EV1_2dpi	914	901.8			65.23	65.23			1	130
IL-4 (26)	X66	B11	0	EV2_2dpi	908	895.8			64.77	64.77			1	161
IL-4 (26)	X67	C11	0	EV3_2dpi	2215	2202.8			170.97	170.97			1	181
IL-4 (26)	X68	D11	0	EV4_2dpi	640.5	628.3			44.69	44.69			1	154
IL-4 (26)	X69	E11	0	EV5_2dpi	504	491.8			34.66	34.66			1	155
IL-4 (26)	X70	F11	0	G2_WT4	43	30.8			2.07	2.07			1	255
IL-4 (26)	X71	G11	0	G2_Vip1	59	46.8			3.17	3.17			1	203
IL-4 (26)	X72	H11	0	G2_Vip2	52.5	40.3			2.72	2.72			1	162
IL-4 (26)	X73	A12	0	WT1_6dpi	141.5	129.3			8.86	8.86			1	128
IL-4 (26)	X74	B12	0	WT2_6dpi	93	80.8			5.5	5.5			1	146
IL-4 (26)	X75	C12	0	WT3_6dpi	74	61.8			4.2	4.2			1	151
IL-4 (26)	X76	D12	0	WT4_6dpi	58	45.8			3.1	3.1			1	189
IL-4 (26)	X77	E12	0	WT5_6dpi	64	51.8			3.51	3.51			1	113
IL-4 (26)	X78	F12	0	G2_Vip3	66	53.8			3.65	3.65			1	211
IL-4 (26)	X79	G12	0	G2_Vip4	56	43.8			2.96	2.96			1	319
IL-4 (26)	X80	H12	0	G2_Vip5	55.5	43.3			2.93	2.93			1	310
*** = Value not available; --- = Designated as an outlier
*Value = Value extrapolated beyond standard range
OOR = Out of Range; OOR> = Out of Range Above; OOR< = Out of Range Below
Exp Conc = Expected Concentration; Obs Conc = Observed Concentration
Conc in Range = Unknown sample concentrations within range where standards recovery is 80-120%
Conc In Range = 1.306 to 5393.318 (equivalent to 19.5 to 23410.8 FI - Bkgd)
Regression Type: Logistic - 5PL
Std. Curve: FI = 0.311369 + (45400 - 0.311369) / ((1 + (Conc / 3046)^-0.756309))^1.32397
FitProb. = 0.4580, ResVar. = 0.7809

## Sheet: IL-5 (27)
File Name: O:\SIgNLab\Immuno Monitoring\Luminex results\301-400\Lisa\2017-11-16 YiHao\YiHao_Procarta_36-plex_20171116_20171116_130300.rbx
Analyte: IL-5 (27)
Acquisition Date: 16-Nov-2017, 12:25 PM
Reader Serial Number: FM3DD10333001
Plate ID:
RP1 PMT (Volts): 520.97
RP1 Target: NA
Analyte	Type	Well	Outlier	Description	FI	FI - Bkgd	Std Dev	%CV	Conc in Range	Obs Conc	Exp Conc	(Obs/Exp) * 100	Dilution	Bead Count
IL-5 (27)	B	H1,H2	0	Reagent Name: Background0	12.3	12.3	1.06	8.66					1
IL-5 (27)	S1	G1,G2	1	Reagent Name: Standard1	---	---					2.43		1
IL-5 (27)	S2	F1,F2	2	Reagent Name: Standard2	15	2.8	0	0	9.49	9.49	9.72	98	1
IL-5 (27)	S3	E1,E2	2	Reagent Name: Standard3	26	13.8	0	0	39.87	39.87	38.87	103	1
IL-5 (27)	S4	D1,D2	0	Reagent Name: Standard4	61.5	49.3	3.54	5.75	154.1	154.1	155.47	99	1
IL-5 (27)	S5	C1,C2	0	Reagent Name: Standard5	185.8	173.5	6.72	3.62	620.1	620.1	621.88	100	1
IL-5 (27)	S6	B1,B2	0	Reagent Name: Standard6	613.8	601.5	15.91	2.59	2493.45	2493.45	2487.5	100	1
IL-5 (27)	S7	A1,A2	0	Reagent Name: Standard7	2046	2033.8	33.94	1.66	9950.02	9950.02	9950	100	1
IL-5 (27)	X1	A3	0	WT1_1dpi	27	14.8	0	0	42.82	42.82			1
IL-5 (27)	X2	B3	0	WT2_1dpi	23	10.8	0	0	31.17	31.17			1
IL-5 (27)	X3	C3	0	WT3_1dpi	27.5	15.3	0	0	44.3	44.3			1
IL-5 (27)	X4	D3	0	WT4_1dpi	23	10.8	0	0	31.17	31.17			1
IL-5 (27)	X5	E3	0	WT5_1dpi	20	7.8	0	0	22.73	22.73			1
IL-5 (27)	X6	F3	0	RH1_6dpi	38.5	26.3	0	0	78.16	78.16			1
IL-5 (27)	X7	G3	0	RHEV1_6dpi	44.5	32.3	0	0	97.4	97.4			1
IL-5 (27)	X8	H3	0	EV1_6dpi	37	24.8	0	0	73.42	73.42			1
IL-5 (27)	X9	A4	0	RH1_1dpi	34	21.8	0	0	64.06	64.06			1
IL-5 (27)	X10	B4	0	RH2_1dpi	33	20.8	0	0	60.97	60.97			1
IL-5 (27)	X11	C4	0	RH3_1dpi	32	19.8	0	0	57.89	57.89			1
IL-5 (27)	X12	D4	0	RH4_1dpi	34	21.8	0	0	64.06	64.06			1
IL-5 (27)	X13	E4	0	RH5_1dpi	27	14.8	0	0	42.82	42.82			1
IL-5 (27)	X14	F4	0	RH2_6dpi	34.5	22.3	0	0	65.61	65.61			1
IL-5 (27)	X15	G4	0	RHEV2_6dpi	37	24.8	0	0	73.42	73.42			1
IL-5 (27)	X16	H4	0	EV2_6dpi	43.5	31.3	0	0	94.16	94.16			1
IL-5 (27)	X17	A5	0	RHEV1_1dpi	36.5	24.3	0	0	71.85	71.85			1
IL-5 (27)	X18	B5	0	RHEV2_1dpi	27	14.8	0	0	42.82	42.82			1
IL-5 (27)	X19	C5	0	RHEV3_1dpi	37	24.8	0	0	73.42	73.42			1
IL-5 (27)	X20	D5	0	RHEV4_1dpi	29	16.8	0	0	48.79	48.79			1
IL-5 (27)	X21	E5	0	RHEV5_1dpi	25	12.8	0	0	36.94	36.94			1
IL-5 (27)	X22	F5	0	RH3_6dpi	35	22.8	0	0	67.16	67.16			1
IL-5 (27)	X23	G5	0	RHEV3_6dpi	35	22.8	0	0	67.16	67.16			1
IL-5 (27)	X24	H5	0	EV3_6dpi	32	19.8	0	0	57.89	57.89			1
IL-5 (27)	X25	A6	0	EV1_1dpi	26	13.8	0	0	39.87	39.87			1
IL-5 (27)	X26	B6	0	EV2_1dpi	26	13.8	0	0	39.87	39.87			1
IL-5 (27)	X27	C6	0	EV3_1dpi	24.5	12.3	0	0	35.49	35.49			1
IL-5 (27)	X28	D6	0	EV4_1dpi	32	19.8	0	0	57.89	57.89			1
IL-5 (27)	X29	E6	0	EV5_1dpi	30	17.8	0	0	51.8	51.8			1
IL-5 (27)	X30	F6	0	RH4_6dpi	39	26.8	0	0	79.74	79.74			1
IL-5 (27)	X31	G6	0	RHEV4_6dpi	38	25.8	0	0	76.58	76.58			1
IL-5 (27)	X32	H6	0	EV4_6dpi	35	22.8	0	0	67.16	67.16			1
IL-5 (27)	X33	A7	0	MK1	28	15.8	0	0	45.79	45.79			1
IL-5 (27)	X34	B7	0	MK2	29	16.8	0	0	48.79	48.79			1
IL-5 (27)	X35	C7	0	MK3	31	18.8	0	0	54.84	54.84			1
IL-5 (27)	X36	D7	0	MK4	26	13.8	0	0	39.87	39.87			1
IL-5 (27)	X37	E7	0	MK5	22	9.8	0	0	28.32	28.32			1
IL-5 (27)	X38	F7	0	RH5_6dpi	39	26.8	0	0	79.74	79.74			1
IL-5 (27)	X39	G7	0	RHEV5_6dpi	34	21.8	0	0	64.06	64.06			1
IL-5 (27)	X40	H7	0	EV5_6dpi	31	18.8	0	0	54.84	54.84			1
IL-5 (27)	X41	A8	0	WT1_2dpi	37	24.8	0	0	73.42	73.42			1
IL-5 (27)	X42	B8	0	WT2_2dpi	42	29.8	0	0	89.33	89.33			1
IL-5 (27)	X43	C8	0	WT3_2dpi	29	16.8	0	0	48.79	48.79			1
IL-5 (27)	X44	D8	0	WT4_2dpi	49	36.8	0	0	112.12	112.12			1
IL-5 (27)	X45	E8	0	WT5_2dpi	34	21.8	0	0	64.06	64.06			1
IL-5 (27)	X46	F8	0	G1_WT1	35	22.8	0	0	67.16	67.16			1
IL-5 (27)	X47	G8	0	G1_WT2	39	26.8	0	0	79.74	79.74			1
IL-5 (27)	X48	H8	0	G1_WT3	42.5	30.3	0	0	90.94	90.94			1
IL-5 (27)	X49	A9	0	RH1_2dpi	28	15.8	0	0	45.79	45.79			1
IL-5 (27)	X50	B9	0	RH2_2dpi	38	25.8	0	0	76.58	76.58			1
IL-5 (27)	X51	C9	0	RH3_2dpi	27	14.8	0	0	42.82	42.82			1
IL-5 (27)	X52	D9	0	RH4_2dpi	33.5	21.3	0	0	62.51	62.51			1
IL-5 (27)	X53	E9	0	RH5_2dpi	30	17.8	0	0	51.8	51.8			1
IL-5 (27)	X54	F9	0	G1_Vip1	28.5	16.3	0	0	47.29	47.29			1
IL-5 (27)	X55	G9	0	G1_Vip2	39	26.8	0	0	79.74	79.74			1
IL-5 (27)	X56	H9	0	G1_Vip3	28	15.8	0	0	45.79	45.79			1
IL-5 (27)	X57	A10	0	RHEV1_2dpi	33	20.8	0	0	60.97	60.97			1
IL-5 (27)	X58	B10	0	RHEV2_2dpi	32	19.8	0	0	57.89	57.89			1
IL-5 (27)	X59	C10	0	RHEV3_2dpi	26.5	14.3	0	0	41.34	41.34			1
IL-5 (27)	X60	D10	0	RHEV4_2dpi	33.5	21.3	0	0	62.51	62.51			1
IL-5 (27)	X61	E10	0	RHEV5_2dpi	27	14.8	0	0	42.82	42.82			1
IL-5 (27)	X62	F10	0	G2_WT1	27	14.8	0	0	42.82	42.82			1
IL-5 (27)	X63	G10	0	G2_WT2	34	21.8	0	0	64.06	64.06			1
IL-5 (27)	X64	H10	0	G2_WT3	35.5	23.3	0	0	68.72	68.72			1
IL-5 (27)	X65	A11	0	EV1_2dpi	37.5	25.3	0	0	75	75			1
IL-5 (27)	X66	B11	0	EV2_2dpi	45	32.8	0	0	99.03	99.03			1
IL-5 (27)	X67	C11	0	EV3_2dpi	52	39.8	0	0	122.06	122.06			1
IL-5 (27)	X68	D11	0	EV4_2dpi	52	39.8	0	0	122.06	122.06			1
IL-5 (27)	X69	E11	0	EV5_2dpi	45	32.8	0	0	99.03	99.03			1
IL-5 (27)	X70	F11	0	G2_WT4	35.5	23.3	0	0	68.72	68.72			1
IL-5 (27)	X71	G11	0	G2_Vip1	36	23.8	0	0	70.29	70.29			1
IL-5 (27)	X72	H11	0	G2_Vip2	42	29.8	0	0	89.33	89.33			1
IL-5 (27)	X73	A12	0	WT1_6dpi	30.5	18.3	0	0	53.32	53.32			1
IL-5 (27)	X74	B12	0	WT2_6dpi	29.5	17.3	0	0	50.29	50.29			1
IL-5 (27)	X75	C12	0	WT3_6dpi	20.5	8.3	0	0	24.11	24.11			1
IL-5 (27)	X76	D12	0	WT4_6dpi	27	14.8	0	0	42.82	42.82			1
IL-5 (27)	X77	E12	0	WT5_6dpi	42	29.8	0	0	89.33	89.33			1
IL-5 (27)	X78	F12	0	G2_Vip3	41	28.8	0	0	86.12	86.12			1
IL-5 (27)	X79	G12	0	G2_Vip4	28	15.8	0	0	45.79	45.79			1
IL-5 (27)	X80	H12	0	G2_Vip5	43.5	31.3	0	0	94.16	94.16			1
Analyte	Type	Well	Outlier	Description	FI	FI - Bkgd	Std Dev	%CV	Conc in Range	Obs Conc	Exp Conc	(Obs/Exp) * 100	Dilution	Bead Count
IL-5 (27)	B	H1	0	Reagent Name: Background0	13	13							1	80
IL-5 (27)	B	H2	0	Reagent Name: Background0	11.5	11.5							1	56
IL-5 (27)	S1	G1	1	Reagent Name: Standard1	14	1.8					2.43		1	56
IL-5 (27)	S1	G2	1	Reagent Name: Standard1	14	1.8					2.43		1	59
IL-5 (27)	S2	F1	0	Reagent Name: Standard2	15	2.8			9.49	9.49	9.72	98	1	55
IL-5 (27)	S2	F2	1	Reagent Name: Standard2	18	5.8					9.72		1	61
IL-5 (27)	S3	E1	1	Reagent Name: Standard3	17	4.8					38.87		1	59
IL-5 (27)	S3	E2	0	Reagent Name: Standard3	26	13.8			39.87	39.87	38.87	103	1	86
IL-5 (27)	S4	D1	0	Reagent Name: Standard4	64	51.8			162.67	162.67	155.47	105	1	85
IL-5 (27)	S4	D2	0	Reagent Name: Standard4	59	46.8			145.59	145.59	155.47	94	1	67
IL-5 (27)	S5	C1	0	Reagent Name: Standard5	181	168.8			601.2	601.2	621.88	97	1	54
IL-5 (27)	S5	C2	0	Reagent Name: Standard5	190.5	178.3			639.06	639.06	621.88	103	1	58
IL-5 (27)	S6	B1	0	Reagent Name: Standard6	625	612.8			2545.84	2545.84	2487.5	102	1	50
IL-5 (27)	S6	B2	0	Reagent Name: Standard6	602.5	590.3			2441.17	2441.17	2487.5	98	1	62
IL-5 (27)	S7	A1	0	Reagent Name: Standard7	2070	2057.8			OOR >	*10092.02	9950	101	1	85
IL-5 (27)	S7	A2	0	Reagent Name: Standard7	2022	2009.8			9808.96	9808.96	9950	99	1	57
IL-5 (27)	X1	A3	0	WT1_1dpi	27	14.8			42.82	42.82			1	83
IL-5 (27)	X2	B3	0	WT2_1dpi	23	10.8			31.17	31.17			1	145
IL-5 (27)	X3	C3	0	WT3_1dpi	27.5	15.3			44.3	44.3			1	144
IL-5 (27)	X4	D3	0	WT4_1dpi	23	10.8			31.17	31.17			1	77
IL-5 (27)	X5	E3	0	WT5_1dpi	20	7.8			22.73	22.73			1	112
IL-5 (27)	X6	F3	0	RH1_6dpi	38.5	26.3			78.16	78.16			1	88
IL-5 (27)	X7	G3	0	RHEV1_6dpi	44.5	32.3			97.4	97.4			1	74
IL-5 (27)	X8	H3	0	EV1_6dpi	37	24.8			73.42	73.42			1	159
IL-5 (27)	X9	A4	0	RH1_1dpi	34	21.8			64.06	64.06			1	131
IL-5 (27)	X10	B4	0	RH2_1dpi	33	20.8			60.97	60.97			1	94
IL-5 (27)	X11	C4	0	RH3_1dpi	32	19.8			57.89	57.89			1	122
IL-5 (27)	X12	D4	0	RH4_1dpi	34	21.8			64.06	64.06			1	112
IL-5 (27)	X13	E4	0	RH5_1dpi	27	14.8			42.82	42.82			1	114
IL-5 (27)	X14	F4	0	RH2_6dpi	34.5	22.3			65.61	65.61			1	108
IL-5 (27)	X15	G4	0	RHEV2_6dpi	37	24.8			73.42	73.42			1	92
IL-5 (27)	X16	H4	0	EV2_6dpi	43.5	31.3			94.16	94.16			1	78
IL-5 (27)	X17	A5	0	RHEV1_1dpi	36.5	24.3			71.85	71.85			1	74
IL-5 (27)	X18	B5	0	RHEV2_1dpi	27	14.8			42.82	42.82			1	95
IL-5 (27)	X19	C5	0	RHEV3_1dpi	37	24.8			73.42	73.42			1	80
IL-5 (27)	X20	D5	0	RHEV4_1dpi	29	16.8			48.79	48.79			1	107
IL-5 (27)	X21	E5	0	RHEV5_1dpi	25	12.8			36.94	36.94			1	155
IL-5 (27)	X22	F5	0	RH3_6dpi	35	22.8			67.16	67.16			1	67
IL-5 (27)	X23	G5	0	RHEV3_6dpi	35	22.8			67.16	67.16			1	88
IL-5 (27)	X24	H5	0	EV3_6dpi	32	19.8			57.89	57.89			1	76
IL-5 (27)	X25	A6	0	EV1_1dpi	26	13.8			39.87	39.87			1	117
IL-5 (27)	X26	B6	0	EV2_1dpi	26	13.8			39.87	39.87			1	81
IL-5 (27)	X27	C6	0	EV3_1dpi	24.5	12.3			35.49	35.49			1	136
IL-5 (27)	X28	D6	0	EV4_1dpi	32	19.8			57.89	57.89			1	85
IL-5 (27)	X29	E6	0	EV5_1dpi	30	17.8			51.8	51.8			1	163
IL-5 (27)	X30	F6	0	RH4_6dpi	39	26.8			79.74	79.74			1	78
IL-5 (27)	X31	G6	0	RHEV4_6dpi	38	25.8			76.58	76.58			1	141
IL-5 (27)	X32	H6	0	EV4_6dpi	35	22.8			67.16	67.16			1	52
IL-5 (27)	X33	A7	0	MK1	28	15.8			45.79	45.79			1	72
IL-5 (27)	X34	B7	0	MK2	29	16.8			48.79	48.79			1	85
IL-5 (27)	X35	C7	0	MK3	31	18.8			54.84	54.84			1	113
IL-5 (27)	X36	D7	0	MK4	26	13.8			39.87	39.87			1	99
IL-5 (27)	X37	E7	0	MK5	22	9.8			28.32	28.32			1	113
IL-5 (27)	X38	F7	0	RH5_6dpi	39	26.8			79.74	79.74			1	94
IL-5 (27)	X39	G7	0	RHEV5_6dpi	34	21.8			64.06	64.06			1	69
IL-5 (27)	X40	H7	0	EV5_6dpi	31	18.8			54.84	54.84			1	74
IL-5 (27)	X41	A8	0	WT1_2dpi	37	24.8			73.42	73.42			1	138
IL-5 (27)	X42	B8	0	WT2_2dpi	42	29.8			89.33	89.33			1	101
IL-5 (27)	X43	C8	0	WT3_2dpi	29	16.8			48.79	48.79			1	143
IL-5 (27)	X44	D8	0	WT4_2dpi	49	36.8			112.12	112.12			1	119
IL-5 (27)	X45	E8	0	WT5_2dpi	34	21.8			64.06	64.06			1	115
IL-5 (27)	X46	F8	0	G1_WT1	35	22.8			67.16	67.16			1	88
IL-5 (27)	X47	G8	0	G1_WT2	39	26.8			79.74	79.74			1	82
IL-5 (27)	X48	H8	0	G1_WT3	42.5	30.3			90.94	90.94			1	90
IL-5 (27)	X49	A9	0	RH1_2dpi	28	15.8			45.79	45.79			1	115
IL-5 (27)	X50	B9	0	RH2_2dpi	38	25.8			76.58	76.58			1	181
IL-5 (27)	X51	C9	0	RH3_2dpi	27	14.8			42.82	42.82			1	121
IL-5 (27)	X52	D9	0	RH4_2dpi	33.5	21.3			62.51	62.51			1	116
IL-5 (27)	X53	E9	0	RH5_2dpi	30	17.8			51.8	51.8			1	160
IL-5 (27)	X54	F9	0	G1_Vip1	28.5	16.3			47.29	47.29			1	66
IL-5 (27)	X55	G9	0	G1_Vip2	39	26.8			79.74	79.74			1	83
IL-5 (27)	X56	H9	0	G1_Vip3	28	15.8			45.79	45.79			1	55
IL-5 (27)	X57	A10	0	RHEV1_2dpi	33	20.8			60.97	60.97			1	129
IL-5 (27)	X58	B10	0	RHEV2_2dpi	32	19.8			57.89	57.89			1	130
IL-5 (27)	X59	C10	0	RHEV3_2dpi	26.5	14.3			41.34	41.34			1	144
IL-5 (27)	X60	D10	0	RHEV4_2dpi	33.5	21.3			62.51	62.51			1	64
IL-5 (27)	X61	E10	0	RHEV5_2dpi	27	14.8			42.82	42.82			1	127
IL-5 (27)	X62	F10	0	G2_WT1	27	14.8			42.82	42.82			1	117
IL-5 (27)	X63	G10	0	G2_WT2	34	21.8			64.06	64.06			1	91
IL-5 (27)	X64	H10	0	G2_WT3	35.5	23.3			68.72	68.72			1	96
IL-5 (27)	X65	A11	0	EV1_2dpi	37.5	25.3			75	75			1	80
IL-5 (27)	X66	B11	0	EV2_2dpi	45	32.8			99.03	99.03			1	84
IL-5 (27)	X67	C11	0	EV3_2dpi	52	39.8			122.06	122.06			1	91
IL-5 (27)	X68	D11	0	EV4_2dpi	52	39.8			122.06	122.06			1	86
IL-5 (27)	X69	E11	0	EV5_2dpi	45	32.8			99.03	99.03			1	71
IL-5 (27)	X70	F11	0	G2_WT4	35.5	23.3			68.72	68.72			1	94
IL-5 (27)	X71	G11	0	G2_Vip1	36	23.8			70.29	70.29			1	89
IL-5 (27)	X72	H11	0	G2_Vip2	42	29.8			89.33	89.33			1	61
IL-5 (27)	X73	A12	0	WT1_6dpi	30.5	18.3			53.32	53.32			1	58
IL-5 (27)	X74	B12	0	WT2_6dpi	29.5	17.3			50.29	50.29			1	86
IL-5 (27)	X75	C12	0	WT3_6dpi	20.5	8.3			24.11	24.11			1	86
IL-5 (27)	X76	D12	0	WT4_6dpi	27	14.8			42.82	42.82			1	83
IL-5 (27)	X77	E12	0	WT5_6dpi	42	29.8			89.33	89.33			1	56
IL-5 (27)	X78	F12	0	G2_Vip3	41	28.8			86.12	86.12			1	77
IL-5 (27)	X79	G12	0	G2_Vip4	28	15.8			45.79	45.79			1	150
IL-5 (27)	X80	H12	0	G2_Vip5	43.5	31.3			94.16	94.16			1	128
*** = Value not available; --- = Designated as an outlier
*Value = Value extrapolated beyond standard range
OOR = Out of Range; OOR> = Out of Range Above; OOR< = Out of Range Below
Exp Conc = Expected Concentration; Obs Conc = Observed Concentration
Conc in Range = Unknown sample concentrations within range where standards recovery is 80-120%
Conc In Range = 9.486 to 9950.016 (equivalent to 2.8 to 2033.8 FI - Bkgd)
Regression Type: Logistic - 5PL
Std. Curve: FI = -1.50706 + (3482.68 + 1.50706) / ((1 + (Conc / 17932.6)^-4.45842))^0.199407
FitProb. = 0.7983, ResVar. = 0.0653

[truncated: 64 more sheets: IL-6 (28), IFN-alpha (30), IL-22 (33), IL-9 (34), IL-13 (35), IL-27 (36), IL-23 (37), IFN-gamma (38), IL-12p70 (39), GM-CSF (42), GRO-alpha (43), RANTES (44), TNF-alpha (45), MIP-1 alpha (47), MCP-3 (48), MCP-1 (51), IL-17A (52), IL-15 IL-15R (54), MIP-2 (55), IL-1 alpha (56) …]
